# Supplementary material for: Brasilterpenes A–E, Bergamotane Sesquiterpenoid Derivatives with Hypoglycemic Activity from the Deep Sea-Derived Fungus Paraconiothyrium brasiliense HDN15-135
Source: MDPI journal article supplement (doi:10.3390/md20050338), 2022-05-23
Supplement: s1 [file s1]

# Supplementary Materials

Brasilterpenes A-E, bergamotane sesquiterpenoid derivatives with  
hypoglycemic activity from the deep sea-derived fungus

*Paraconiothyrium brasiliense* HDN15-135

Wenxue Wang <sup>1,‡</sup>, Yeqin Shi <sup>2,‡</sup>, Yuanyuan Liu <sup>1</sup>, Yundong Zhang <sup>1</sup>, Jiajin Wu <sup>1</sup>,  
Guojian Zhang <sup>1,3</sup>, Qian Che <sup>1</sup>, Tianjiao Zhu <sup>1</sup>, Mingyu Li <sup>2,\*</sup>, and Dehai Li <sup>1,3,\*</sup>

<sup>1</sup> Key Laboratory of Marine Drugs, Chinese Ministry of Education, School of Medicine and Pharmacy, Ocean University of China, Qingdao 266003, China; bx\_wwx@163.com (W.W.); lyy19970310@163.com (Y.L.); zhangyundong0908@163.com (Y.Z.); wjj981123@163.com (J.W.); zhangguojian@ouc.edu.cn (G.Z.); cheqian064@ouc.edu.cn (Q.C.); zhutj@ouc.edu.cn (T.Z.)

<sup>2</sup> Fujian Provincial Key Laboratory of Innovative Drug Target Research, School of Pharmaceutical Science, Xiamen University, Xiamen 361102, China; syq001235@163.com (Y.S.)

<sup>3</sup> Laboratory for Marine Drugs and Bioproducts of Qingdao National Laboratory for Marine Science and Technology, Qingdao 266237, China

## Contents

|                                                                                                                              |    |
|------------------------------------------------------------------------------------------------------------------------------|----|
| <b>Figure S1</b> HPLC analysis of the crude extract of HDN15-135.....                                                        | 1  |
| <b>Figure S2</b> Structures of reported bergamotane sesquiterpenoids.....                                                    | 1  |
| <b>Figure S3</b> HRESIMS spectrum of brasilterpene A ( <b>1</b> ).....                                                       | 4  |
| <b>Figure S4</b> IR spectrum (KBr) of brasilterpene A ( <b>1</b> ).....                                                      | 4  |
| <b>Figure S5</b> <sup>1</sup> H NMR spectrum (DMSO- <i>d</i> <sub>6</sub> , 400 MHz) of brasilterpene A ( <b>1</b> ).....    | 5  |
| <b>Figure S6</b> DEPTQ-NMR spectrum (DMSO- <i>d</i> <sub>6</sub> , 100 MHz) of brasilterpene A ( <b>1</b> ).....             | 5  |
| <b>Figure S7</b> HSQC spectrum of brasilterpene A ( <b>1</b> ).....                                                          | 6  |
| <b>Figure S8</b> HMBC spectrum of brasilterpene A ( <b>1</b> ) .....                                                         | 6  |
| <b>Figure S9</b> <sup>1</sup> H- <sup>1</sup> H COSY spectrum of brasilterpene A ( <b>1</b> ) .....                          | 7  |
| <b>Figure S10</b> NOESY spectrum of brasilterpene A ( <b>1</b> ) .....                                                       | 7  |
| <b>Figure S11</b> HRESIMS spectrum of brasilterpene B ( <b>2</b> ).....                                                      | 8  |
| <b>Figure S12</b> IR spectrum (KBr) of brasilterpene B ( <b>2</b> ) .....                                                    | 8  |
| <b>Figure S13</b> <sup>1</sup> H NMR spectrum (DMSO- <i>d</i> <sub>6</sub> , 400 MHz) of brasilterpene B ( <b>2</b> ).....   | 9  |
| <b>Figure S14</b> DEPTQ-NMR spectrum (DMSO- <i>d</i> <sub>6</sub> , 125 MHz) of brasilterpene B ( <b>2</b> ).....            | 9  |
| <b>Figure S15</b> HSQC spectrum of brasilterpene B ( <b>2</b> ) .....                                                        | 10 |
| <b>Figure S16</b> HMBC spectrum of brasilterpene B ( <b>2</b> ) .....                                                        | 10 |
| <b>Figure S17</b> <sup>1</sup> H- <sup>1</sup> H COSY spectrum of brasilterpene B ( <b>2</b> ).....                          | 11 |
| <b>Figure S18</b> NOESY spectrum of brasilterpene B ( <b>2</b> ).....                                                        | 11 |
| <b>Figure S19</b> HRESIMS spectrum of brasilterpene C ( <b>3</b> ).....                                                      | 12 |
| <b>Figure S20</b> IR spectrum (KBr) of brasilterpene C ( <b>3</b> ) .....                                                    | 12 |
| <b>Figure S21</b> <sup>1</sup> H NMR spectrum (DMSO- <i>d</i> <sub>6</sub> , 500 MHz) of brasilterpene C ( <b>3</b> ).....   | 13 |
| <b>Figure S22</b> <sup>13</sup> C NMR spectrum (DMSO- <i>d</i> <sub>6</sub> , 100 MHz) of brasilterpene C ( <b>3</b> ) ..... | 13 |
| <b>Figure S23</b> HSQC spectrum of brasilterpene C ( <b>3</b> ) .....                                                        | 14 |
| <b>Figure S24</b> HMBC spectrum of brasilterpene C ( <b>3</b> ) .....                                                        | 14 |
| <b>Figure S25</b> <sup>1</sup> H- <sup>1</sup> H COSY spectrum of brasilterpene C ( <b>3</b> ).....                          | 14 |
| <b>Figure S26</b> NOESY spectrum of brasilterpene C ( <b>3</b> ).....                                                        | 15 |
| <b>Figure S27</b> HRESIMS spectrum of brasilterpene D ( <b>4</b> ) .....                                                     | 15 |
| <b>Figure S28</b> IR spectrum (KBr) of brasilterpene D ( <b>4</b> ) .....                                                    | 16 |
| <b>Figure S29</b> <sup>1</sup> H NMR spectrum (DMSO- <i>d</i> <sub>6</sub> , 500 MHz) of brasilterpene D ( <b>4</b> ) .....  | 16 |
| <b>Figure S30</b> <sup>13</sup> C NMR spectrum (DMSO- <i>d</i> <sub>6</sub> , 100 MHz) of brasilterpene D ( <b>4</b> ) ..... | 17 |
| <b>Figure S31</b> HSQC spectrum of brasilterpene D ( <b>4</b> ) .....                                                        | 18 |
| <b>Figure S32</b> HMBC spectrum of brasilterpene D ( <b>4</b> ).....                                                         | 18 |
| <b>Figure S33</b> <sup>1</sup> H- <sup>1</sup> H COSY spectrum of brasilterpene D ( <b>4</b> ).....                          | 18 |
| <b>Figure S34</b> NOESY spectrum of brasilterpene D ( <b>4</b> ).....                                                        | 19 |

|                                                                                                                                                                                                                                                                                 |    |
|---------------------------------------------------------------------------------------------------------------------------------------------------------------------------------------------------------------------------------------------------------------------------------|----|
| <b>Figure S35</b> HRESIMS spectrum of brasilterpene E ( <b>5</b> ).....                                                                                                                                                                                                         | 19 |
| <b>Figure S36</b> IR spectrum (KBr) of brasilterpene E ( <b>5</b> ).....                                                                                                                                                                                                        | 20 |
| <b>Figure S37</b> <sup>1</sup> H NMR spectrum (DMSO- <i>d</i> <sub>6</sub> , 600 MHz) of brasilterpene E ( <b>5</b> ).....                                                                                                                                                      | 21 |
| <b>Figure S38</b> DEPTQ-NMR spectrum (DMSO- <i>d</i> <sub>6</sub> , 100 MHz) of brasilterpene E ( <b>5</b> )...                                                                                                                                                                 | 21 |
| <b>Figure S39</b> HSQC spectrum of brasilterpene E ( <b>5</b> ).....                                                                                                                                                                                                            | 22 |
| <b>Figure S40</b> HMBC spectrum of brasilterpene E ( <b>5</b> ) .....                                                                                                                                                                                                           | 22 |
| <b>Figure S41</b> <sup>1</sup> H- <sup>1</sup> H COSY spectrum of brasilterpene E ( <b>5</b> ) .....                                                                                                                                                                            | 23 |
| <b>Figure S42</b> NOESY spectrum of brasilterpene E ( <b>5</b> ) .....                                                                                                                                                                                                          | 23 |
| <b>Figure S43</b> DFT-optimized structures for low-energy conformers of <b>1a</b> (1 <i>S</i> ,3 <i>R</i> ,5 <i>R</i> ,6 <i>S</i> ,9 <i>S</i> ,14 <i>S</i> - <b>1</b> ) at B3LYP/6-31+G(d) level in DMSO (PCM). .....                                                           | 24 |
| <b>Table S1</b> Harmonic frequencies (cm <sup>-1</sup> ) of compound <b>1a</b> . .....                                                                                                                                                                                          | 25 |
| <b>Table S2</b> Important thermodynamic parameters (a.u.) and Boltzmann distributions of the optimized compound <b>1a</b> at B3LYP/6-31G+(d) level of theory with PCM solvent model for DMSO. ....                                                                              | 25 |
| <b>Table S3</b> Cartesian coordinates of the low-energy re-optimized conformers of compound <b>1a</b> (1 <i>S</i> ,3 <i>R</i> ,5 <i>R</i> ,6 <i>S</i> ,9 <i>S</i> ,14 <i>S</i> - <b>1</b> ) calculated at B3LYP/6-31+G(d) level of theory with PCM solvent model for DMSO. .... | 25 |
| <b>Figure S44</b> DFT-optimized structures for low-energy conformers of <b>1b</b> (1 <i>S</i> ,3 <i>S</i> ,5 <i>R</i> ,6 <i>S</i> ,9 <i>S</i> ,14 <i>S</i> - <b>1</b> ) at B3LYP/6-31+G(d) level in DMSO (PCM).....                                                             | 35 |
| <b>Table S4</b> Harmonic frequencies (cm <sup>-1</sup> ) of compound <b>1b</b> . ....                                                                                                                                                                                           | 35 |
| <b>Table S5</b> Important thermodynamic parameters (a.u.) and Boltzmann distributions of the optimized compound <b>1b</b> at B3LYP/6-31G+(d) level of theory with PCM solvent model for DMSO. ....                                                                              | 36 |
| <b>Table S6</b> Cartesian coordinates of the low-energy re-optimized conformers of compound <b>1b</b> (1 <i>S</i> ,3 <i>S</i> ,5 <i>R</i> ,6 <i>S</i> ,9 <i>S</i> ,14 <i>S</i> - <b>1</b> ) calculated at B3LYP/6-31+G(d) level of theory with PCM solvent model for DMSO. .... | 36 |
| <b>Table S7</b> Calculated <sup>1</sup> H and <sup>13</sup> C NMR chemical shifts of compound <b>1a</b> . ....                                                                                                                                                                  | 43 |
| <b>Table S8</b> Calculated <sup>1</sup> H and <sup>13</sup> C NMR chemical shifts of compound <b>1b</b> . ....                                                                                                                                                                  | 45 |
| <b>Figure S45</b> Correlation plots of experimental <sup>13</sup> C NMR chemical shifts of brasilterpene A ( <b>1</b> ) corresponding calculated <sup>13</sup> C NMR chemical shifts of <b>1a</b> and <b>1b</b> . ....                                                          | 47 |
| <b>Table S9</b> DP4+ analysis using the calculated shielding tensors for compound <b>1a</b> and <b>1b</b> . ....                                                                                                                                                                | 48 |
| <b>Figure S46</b> DFT-optimized structures for low-energy conformers of <b>1</b> (1 <i>S</i> ,3 <i>S</i> ,5 <i>R</i> ,6 <i>S</i> ,9 <i>S</i> ,14 <i>S</i> - <b>1</b> ) at B3LYP/6-31+G(d) level in MeOH (PCM). ....                                                             | 48 |
| <b>Table S10</b> Harmonic frequencies (cm <sup>-1</sup> ) of compound <b>1</b> . ....                                                                                                                                                                                           | 49 |
| <b>Table S11</b> Important thermodynamic parameters (a.u.) and Boltzmann distributions of the optimized compound <b>1</b> at B3LYP/6-31G+(d) level of theory with PCM solvent model for MeOH.....                                                                               | 49 |

|                                                                                                                                                                                                                                                                                |    |
|--------------------------------------------------------------------------------------------------------------------------------------------------------------------------------------------------------------------------------------------------------------------------------|----|
| <b>Table S12</b> Cartesian coordinates of the low-energy re-optimized conformers of compound <b>1</b> (1 <i>S</i> ,3 <i>S</i> ,5 <i>R</i> ,6 <i>S</i> ,9 <i>S</i> ,14 <i>S</i> - <b>1</b> ) calculated at B3LYP/6-31+G(d) level of theory with PCM solvent model for MeOH..... | 49 |
| <b>Figure S47</b> DFT-optimized structures for low-energy conformers of <b>2</b> (1 <i>S</i> ,3 <i>S</i> ,5 <i>R</i> ,6 <i>S</i> ,9 <i>S</i> ,14 <i>R</i> - <b>2</b> ) at B3LYP/6-31+G(d) level in MeOH (PCM).....                                                             | 55 |
| <b>Table S13</b> Harmonic frequencies (cm <sup>-1</sup> ) of compound <b>2</b> . ....                                                                                                                                                                                          | 55 |
| <b>Table S14</b> Important thermodynamic parameters (a.u.) and Boltzmann distributions of the optimized compound <b>2</b> at B3LYP/6-31G+(d) level of theory with PCM solvent model for MeOH.....                                                                              | 56 |
| <b>Table S15</b> Cartesian coordinates of the low-energy re-optimized conformers of compound <b>2</b> (1 <i>S</i> ,3 <i>S</i> ,5 <i>R</i> ,6 <i>S</i> ,9 <i>S</i> ,14 <i>R</i> - <b>2</b> ) calculated at B3LYP/6-31+G(d) level of theory with PCM solvent model for MeOH..... | 56 |
| <b>Figure S48</b> DFT-optimized structures for low-energy conformers of <b>3</b> (1 <i>S</i> ,5 <i>S</i> ,6 <i>S</i> ,9 <i>S</i> ,14 <i>S</i> - <b>3</b> ) at B3LYP/6-31+G(d) level in MeOH (PCM). ....                                                                        | 59 |
| <b>Table S16</b> Harmonic frequencies (cm <sup>-1</sup> ) of compound <b>3</b> . ....                                                                                                                                                                                          | 60 |
| <b>Table S17</b> Important thermodynamic parameters (a.u.) and Boltzmann distributions of the optimized compound <b>3</b> at B3LYP/6-31G+(d) level of theory with PCM solvent model for MeOH.....                                                                              | 61 |
| <b>Table S18</b> Cartesian coordinates of the low-energy re-optimized conformers of compound <b>3</b> (1 <i>S</i> ,5 <i>S</i> ,6 <i>S</i> ,9 <i>S</i> ,14 <i>S</i> - <b>3</b> ) calculated at B3LYP/6-31+G(d) level of theory with PCM solvent model for MeOH.....             | 61 |
| <b>Figure S49</b> DFT-optimized structures for low-energy conformers of <b>4</b> (1 <i>S</i> ,5 <i>S</i> ,6 <i>S</i> ,9 <i>S</i> ,14 <i>R</i> - <b>4</b> ) at B3LYP/6-31+G(d) level in MeOH (PCM). ....                                                                        | 67 |
| <b>Table S19</b> Harmonic frequencies (cm <sup>-1</sup> ) of compound <b>4</b> . ....                                                                                                                                                                                          | 67 |
| <b>Table S20</b> Important thermodynamic parameters (a.u.) and Boltzmann distributions of the optimized compound <b>4</b> at B3LYP/6-31G+(d) level of theory with PCM solvent model for MeOH.....                                                                              | 67 |
| <b>Table S21</b> Cartesian coordinates of the low-energy re-optimized conformers of compound <b>4</b> (1 <i>S</i> ,5 <i>S</i> ,6 <i>S</i> ,9 <i>S</i> ,14 <i>R</i> - <b>4</b> ) calculated at B3LYP/6-31+G(d) level of theory with PCM solvent model for MeOH.....             | 68 |
| <b>Figure S50</b> DFT-optimized structures for low-energy conformers of <b>5</b> (1 <i>S</i> ,5 <i>S</i> ,6 <i>S</i> ,9 <i>S</i> ,14 <i>R</i> - <b>5</b> ) at B3LYP/tzvp level in MeOH (PCM). ....                                                                             | 71 |
| <b>Table S22</b> Harmonic frequencies (cm <sup>-1</sup> ) of compound <b>5</b> . ....                                                                                                                                                                                          | 72 |
| <b>Table S23</b> Important thermodynamic parameters (a.u.) and Boltzmann distributions of the optimized compound <b>5</b> at B3LYP/tzvp level of theory with PCM solvent model for MeOH. ....                                                                                  | 72 |
| <b>Table S24</b> Cartesian coordinates of the low-energy re-optimized conformers of compound <b>5</b> (1 <i>S</i> ,5 <i>S</i> ,6 <i>S</i> ,9 <i>S</i> ,14 <i>R</i> - <b>5</b> ) calculated at B3LYP/tzvp level of theory with PCM solvent model for MeOH. ....                 | 72 |

**Figure S1** HPLC analysis of the crude extract of HDN15-135

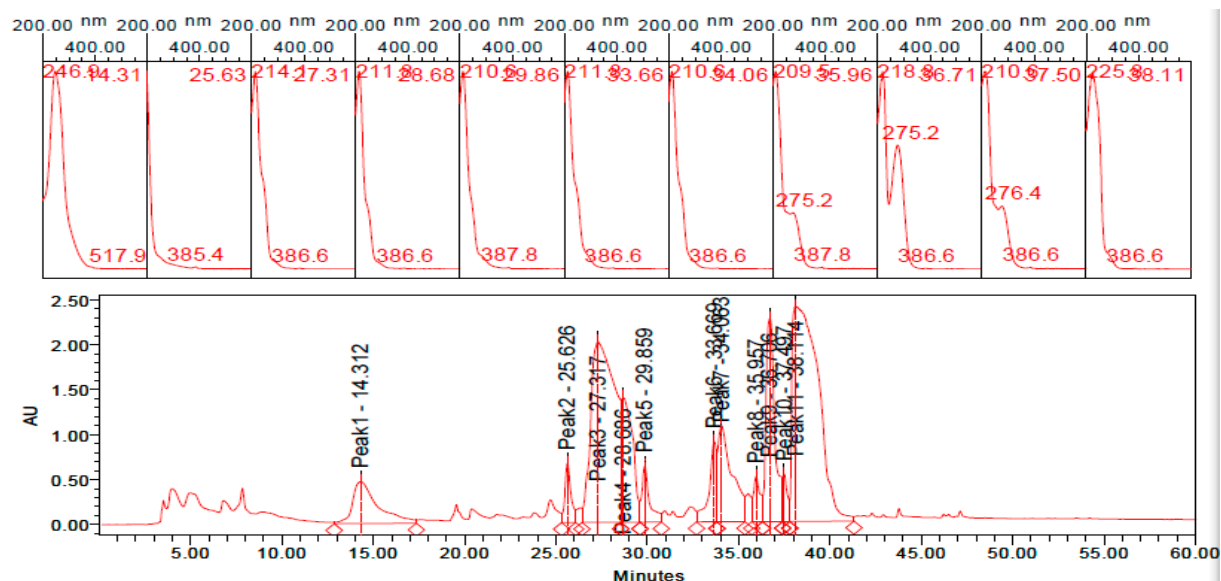

**Figure S2** Structures of reported bergamotane sesquiterpenoids

### Type I bicyclo[3.1.1]heptan [1-9]

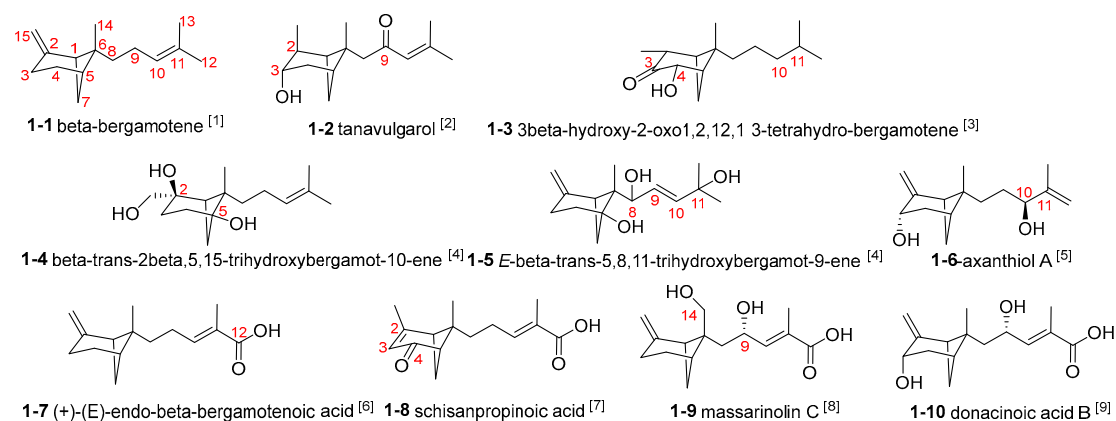

### Type II tricyclo[4.3.0.0<sup>4,7</sup>]nonane [9-14]

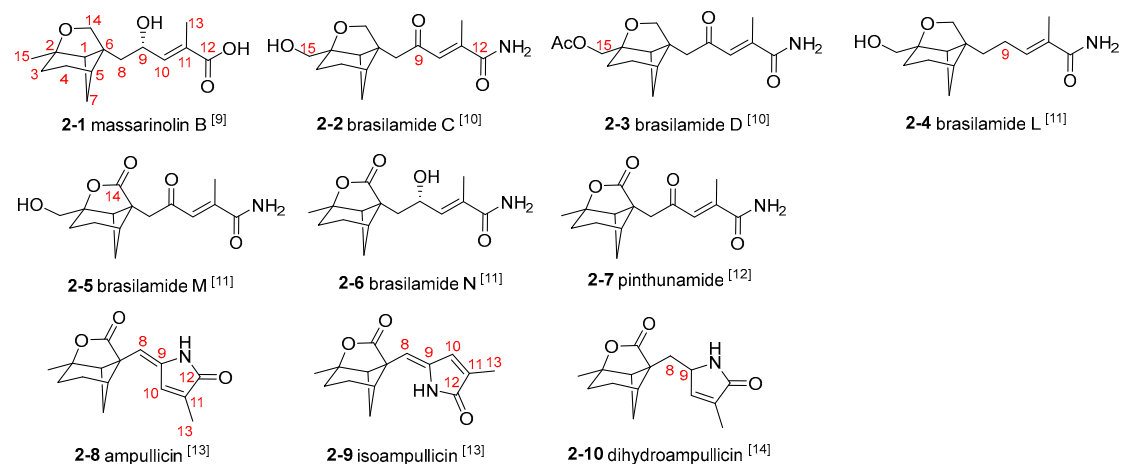

### Type III tricyclo[3.3.1.0<sup>2,7</sup>]nonane [10, 11]

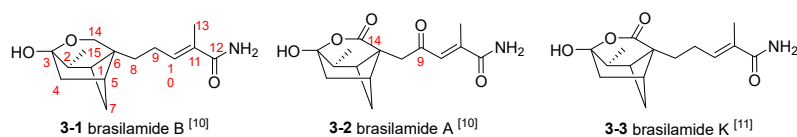

### Type IV 6/4/5/5 tetracyclic skeleton [8, 9, 15-17]

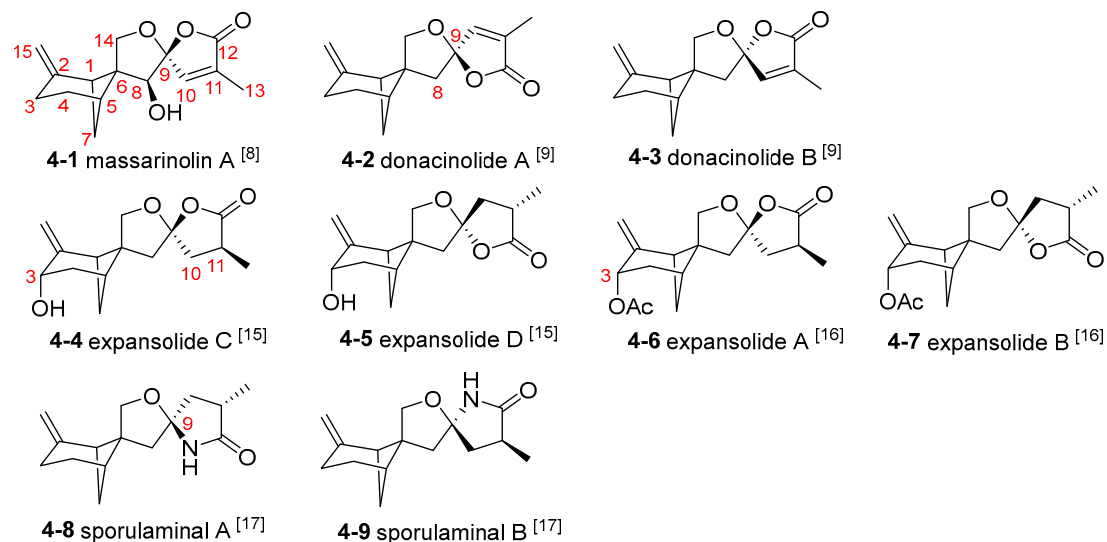

### Type V 5/6/4/5 tetracyclic skeleton [9]

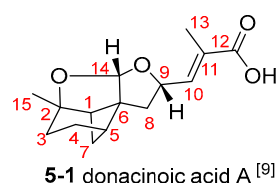

## References

- [1] Kulkarni, K. S.; Paknikar, S. K.; Vaidya, A. S.; Kelkar, G. R.; Bates, R. B.; Bhattacharyya, S. C. Structure of  $\beta$ -bergamotene. *Tetrahedron Lett.* **1963**, 4, 505-511. [https://doi.org/10.1016/S0040-4039\(01\)90662-8](https://doi.org/10.1016/S0040-4039(01)90662-8).
- [2] Chandra, A.; Misra, L. N.; Thakur, R. S. Tanavulgarol, an oxygenated sesquiterpene with an uncommon skeleton from *Tanacetum vulgare*. *Phytochemistry* **1987**, 26, 3077-3078. [https://doi.org/10.1016/S0031-9422\(00\)84600-2](https://doi.org/10.1016/S0031-9422(00)84600-2).
- [3] Misra, L. N.; Ahmad, A. An oxygenated tetrahydrobergamotene from the essential oil of *Dracocephalum nutans*. *Planta Med.* **1992**, 58, 478-479. <https://doi.org/10.1055/s-2006-961524>.
- [4] Wang, Y.; Li, D. H.; Li, Z. L.; Sun, Y. J.; Hua, H. M.; Liu, T.; Bai, J. Terpenoids from the marine-derived fungus *Aspergillus fumigatus* YK-7. *Molecules* **2016**, 21, 31. <https://doi.org/10.3390/molecules21010031>.
- [5] Yin, H.; Jiang, N.; Guo, C.; Gao, J.-M. A new bergamotane sesquiterpenoid from the rhizomes of *Amomum villosum* var. *xanthioides*. *Nat. Prod. Res.* **2021**, 35, 377-383. <https://doi.org/10.1080/14786419.2019.1633649>.

- [6] Breeden, D. C.; Young, T. E.; Coates, R. M.; Juvik, J. A. Identification and bioassay of kairomones for *Helicoverpa zea*. *J. Chem. Ecol.* **1996**, *22*, 513-539. <https://doi.org/10.1007/BF02033653>.
- [7] Liu, M.; Hu, Z. X.; Luo, Y. Q.; Zhou, M.; Wang, W. G.; Li, X. N.; Du, X.; Pu, J. X.; Sun, H. D. Two new compounds from *Schisandra propinqua* var. *propinqua*. *Nat. Prod. Bioprospect.* **2017**, *7*, 257-262. <https://doi.org/10.1007/s13659-017-0129-7>.
- [8] Oh, H.; Gloer, J. B.; Shearer, C. A. Massarinolins A-C: new bioactive sesquiterpenoids from the aquatic fungus *Massarina tunicata*. *J. Nat. Prod.* **1999**, *62*, 497-501. <https://doi.org/10.1021/np980447+>.
- [9] Zhao, Z. Z.; Zhao, K.; Chen, H. P.; Bai, X.; Zhang, L.; Liu, J. K. Terpenoids from the mushroom-associated fungus *Montagnula donacina*. *Phytochemistry* **2018**, *147*, 21-29. <https://doi.org/10.1016/j.phytochem.2017.12.015>.
- [10] Liu, L.; Gao, H.; Chen, X.; Cai, X.; Yang, L.; Guo, L.; Yao, X.; Che, Y. Brasilamides A-D: sesquiterpenoids from the plant endophytic fungus *Paraconiothyrium brasiliense*. *Eur. J. Org. Chem.* **2010**, *2010*, 3302-3306. <https://doi.org/10.1002/ejoc.201000284>.
- [11] Guo, Z.; Ren, F.; Che, Y.; Liu, G.; Liu, L. New bergamotane sesquiterpenoids from the plant endophytic fungus *Paraconiothyrium brasiliense*. *Molecules* **2015**, *20*, 14611-14620. <https://doi.org/10.3390/molecules200814611>.
- [12] Kimura, Y.; Nakajima, H.; Hamasaki, T. Pinthunamide, a new tricyclic sesquiterpene amide produced by a fungus, *Ampullifernia* sp. *Tetrahedron Lett.* **1989**, *30*, 1267-1270. [https://doi.org/10.1016/S0040-4039\(00\)72732-8](https://doi.org/10.1016/S0040-4039(00)72732-8).
- [13] Kimura, Y.; Nakajima, H.; Hamasaki, T.; Matsumoto, T.; Matsuda, Y.; Tsuneda, A. Ampullicin and isoampullicin, new metabolites from an *Ampulliferina*-like fungus sp. No. 27. *Agric. Biol. Chem.* **1990**, *54*, 813-814. <https://doi.org/10.1271/bbb1961.54.813>.
- [14] Kimura, Y.; Matsumoto, T.; Nakajima, H.; Hamasaki, T.; Matsuda, Y. Dihydroampullicin, a new plant growth regulators produced by the *Ampulliferina*-like fungus sp. No. 27. *Biosci. Biotechnol. Biochem.* **1993**, *57*, 687-688. <https://doi.org/10.1271/bbb.57.687>.
- [15] Ying, Y. M.; Fang, C. A.; Yao, F. Q.; Yu, Y.; Shen, Y.; Hou, Z. N.; Wang, Z.; Zhang, W.; Shan, W. G.; Zhan, Z. J. Bergamotane sesquiterpenes with alpha-glucosidase inhibitory activity from the plant pathogenic fungus *Penicillium expansum*. *Chem. Biodivers.* **2017**, *14*, e1600184. <https://doi.org/10.1002/cbdv.201600184>.
- [16] Massias, M.; Rebuffat, S.; Molho, L.; Chiaroni, A.; Riche, C.; Bodo, B. Expansolides A and B: tetracyclic sesquiterpene lactones from *Penicillium expansum*. *J. Am. Chem. Soc.* **1990**, *112*, 8112-8115. <https://doi.org/10.1021/ja00178a039>.
- [17] Zhang, L. H.; Feng, B. M.; Chen, G.; Li, S. G.; Sun, Y.; Wu, H. H.; Bai, J.; Hua, H. M.; Wang, H. F.; Pei, Y. H. Sporulaminals A and B: a pair of unusual epimeric spiroaminal derivatives from a marine-derived fungus *Paraconiothyrium sporulosum* YK-03. *RSC Adv.* **2016**, *6*, 42361-42366. <https://doi.org/10.1039/c6ra01401a>.

**Figure S3** HRESIMS spectrum of brasilterpene A (**1**)

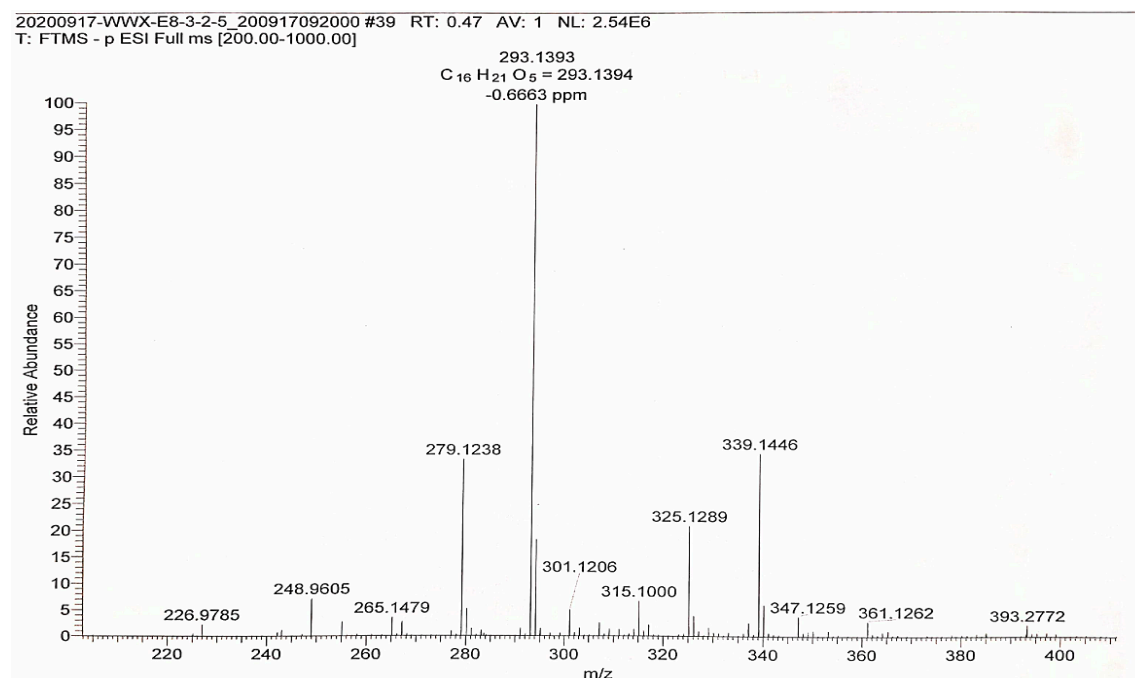

**Figure S4** IR spectrum (KBr) of brasilterpene A (**1**)

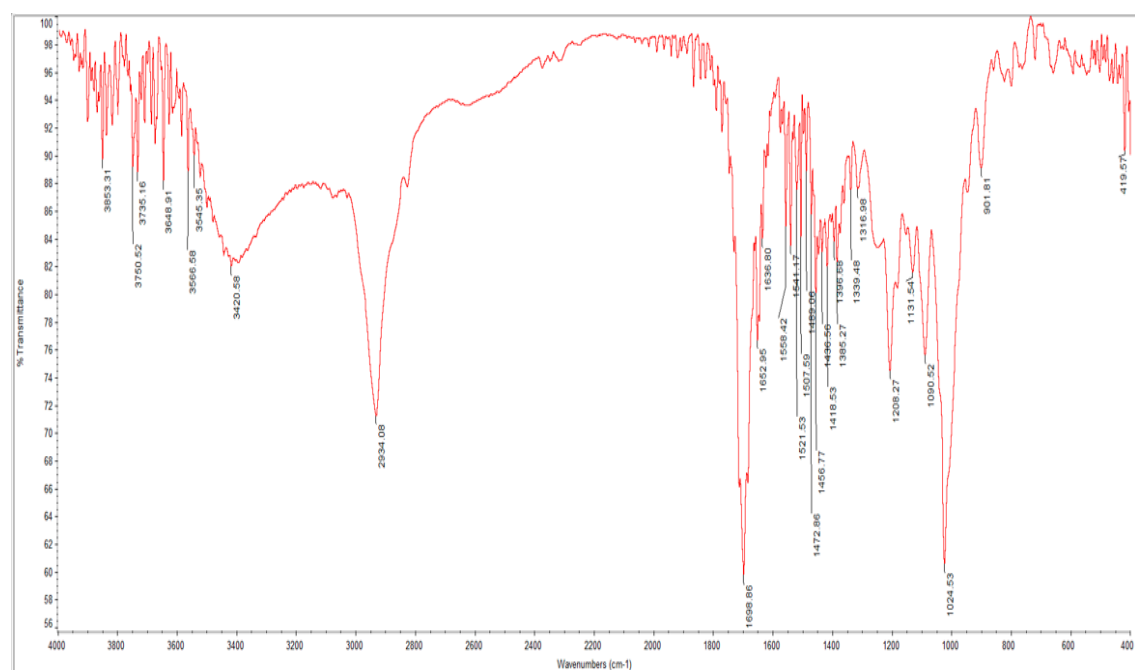



**Figure S5**  $^1\text{H}$  NMR spectrum (DMSO- $d_6$ , 400 MHz) of brasilterpene A (**1**)

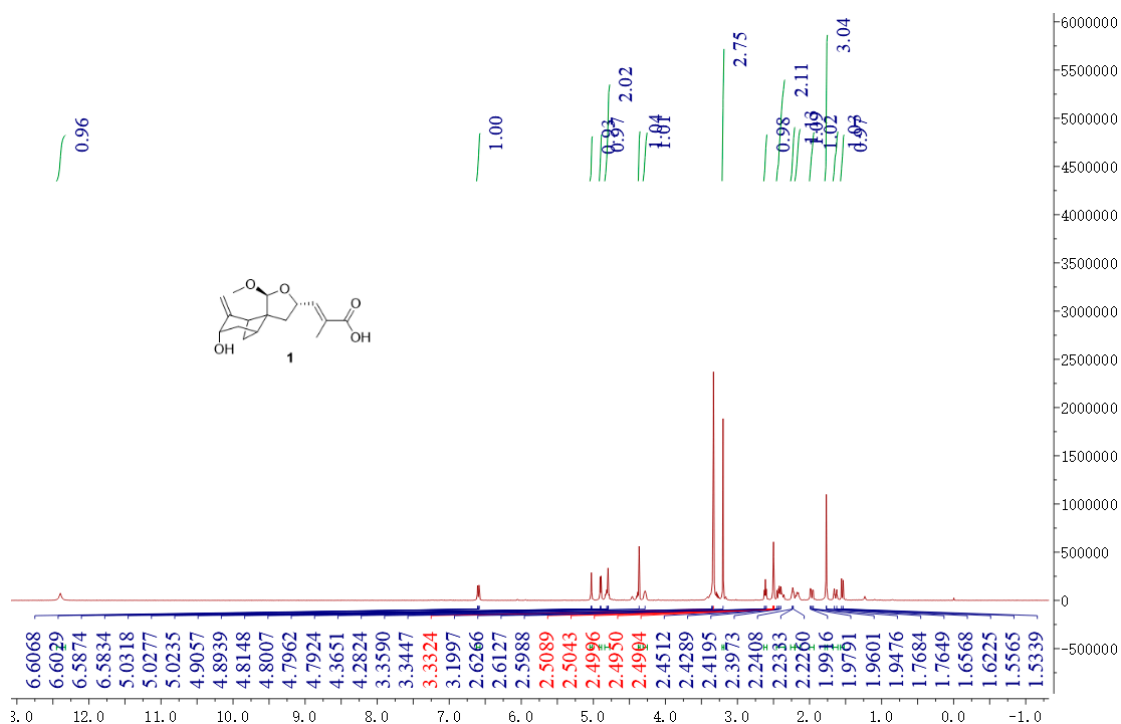

**Figure S6** DEPTQ-NMR spectrum (DMSO- $d_6$ , 100 MHz) of brasilterpene A (**1**)

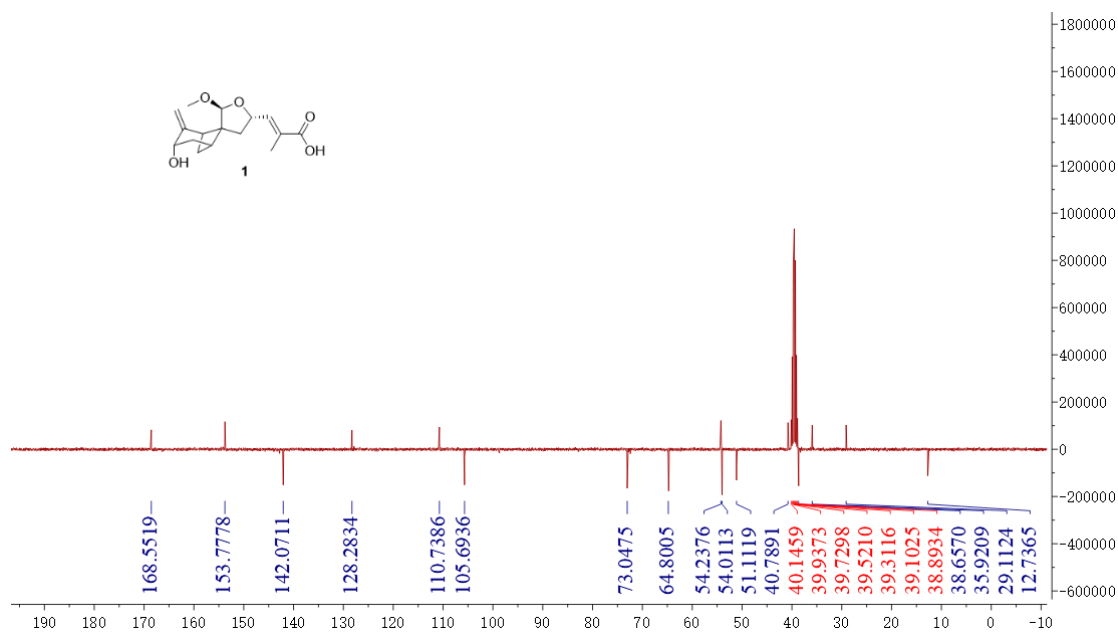

**Figure S7** HSQC spectrum of brasilterpene A (**1**)

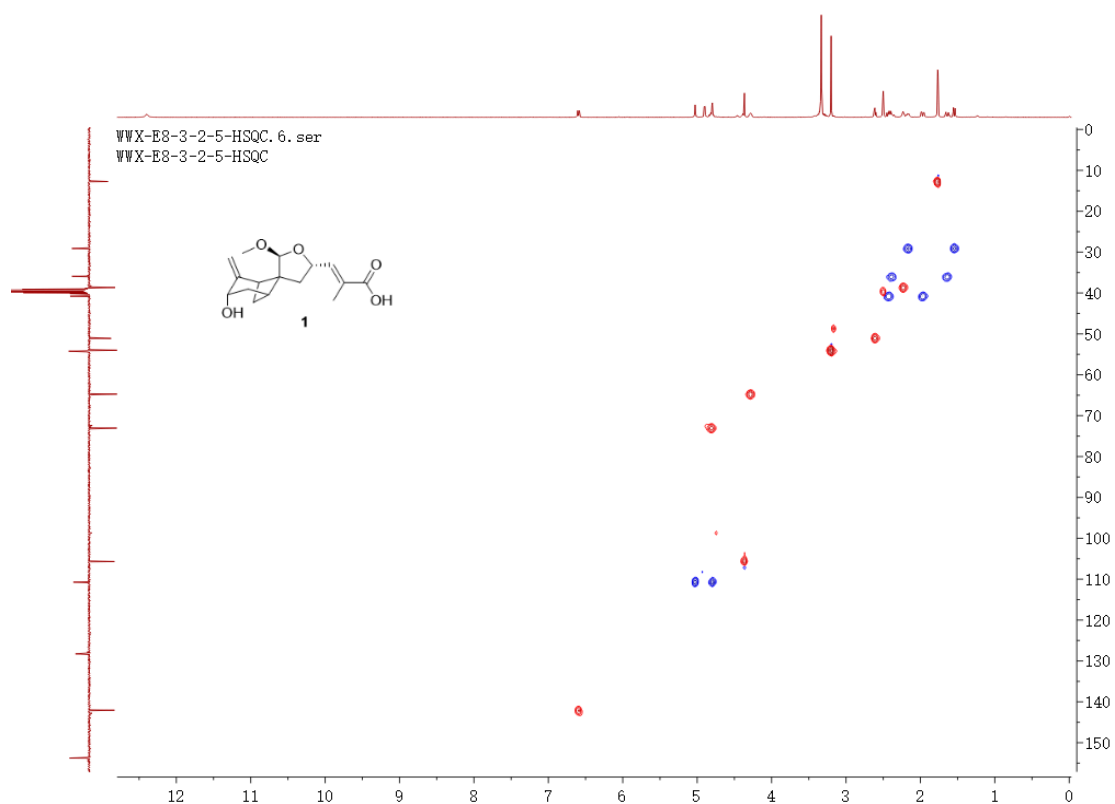

**Figure S8** HMBC spectrum of brasilterpene A (**1**)

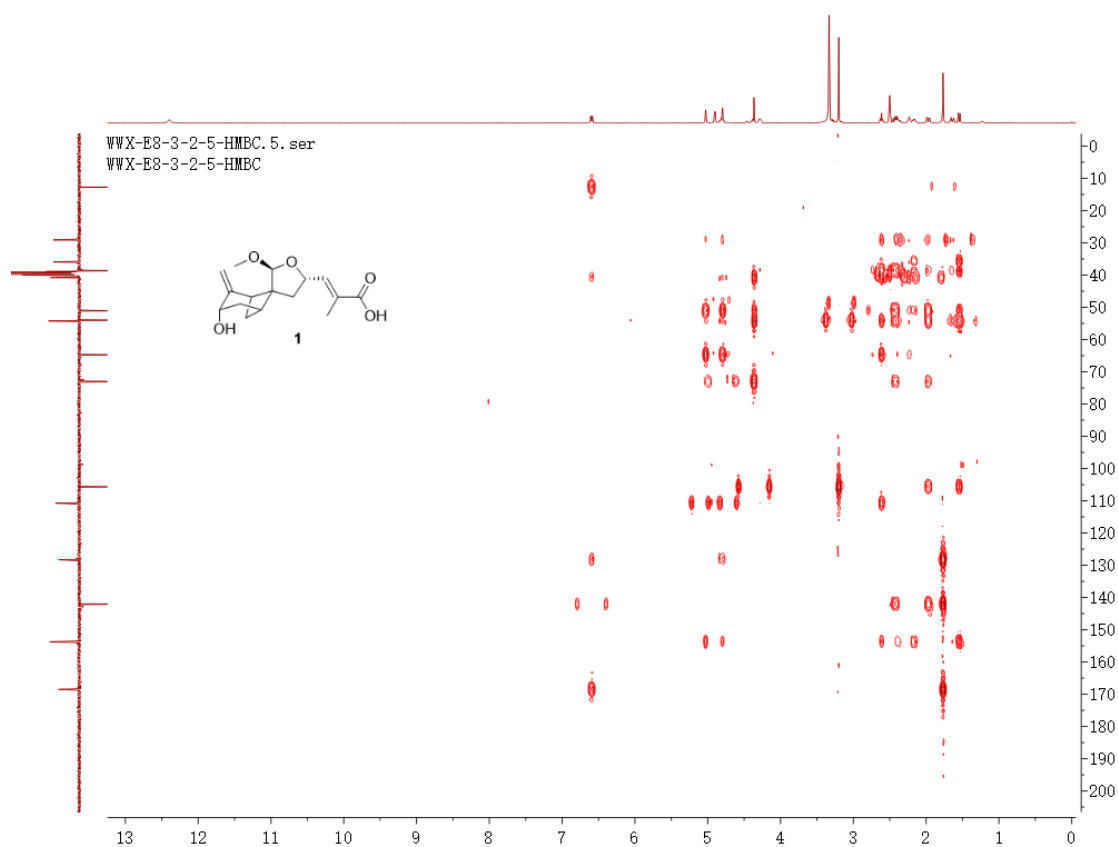

**Figure S9**  $^1\text{H}$ - $^1\text{H}$  COSY spectrum of brasilterpene A (**1**)

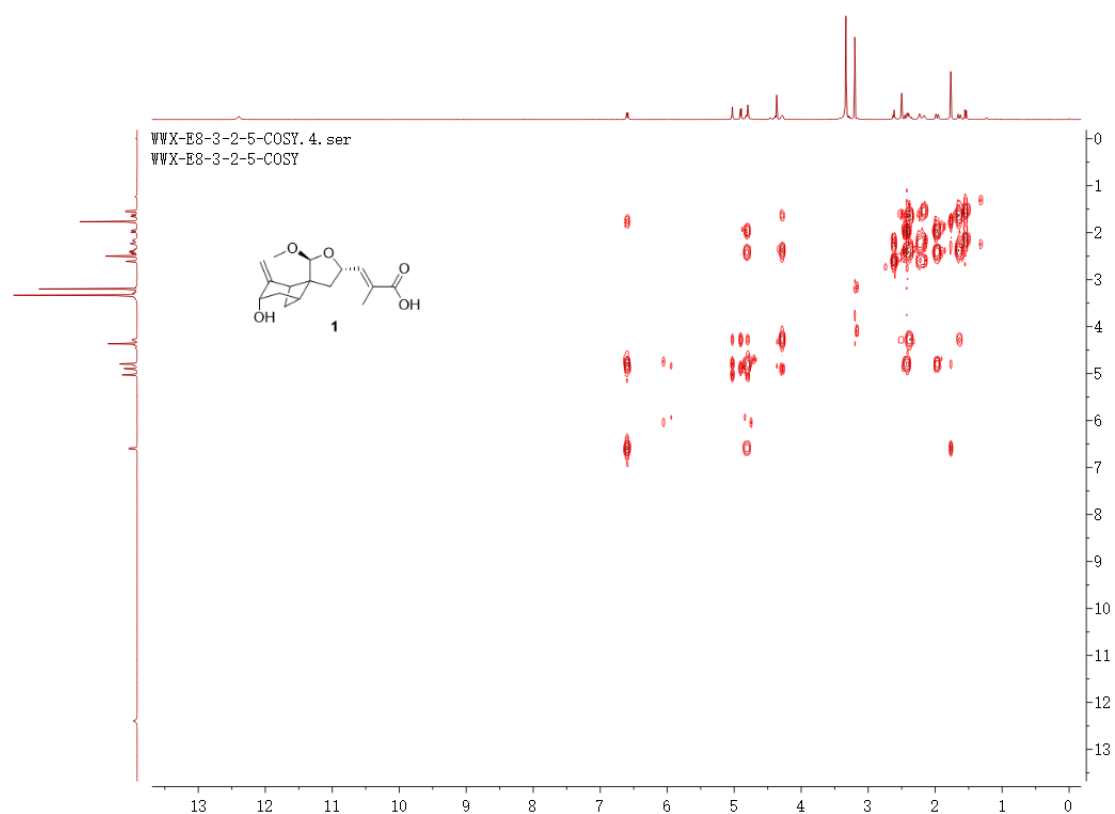

**Figure S10** NOESY spectrum of brasilterpene A (**1**)

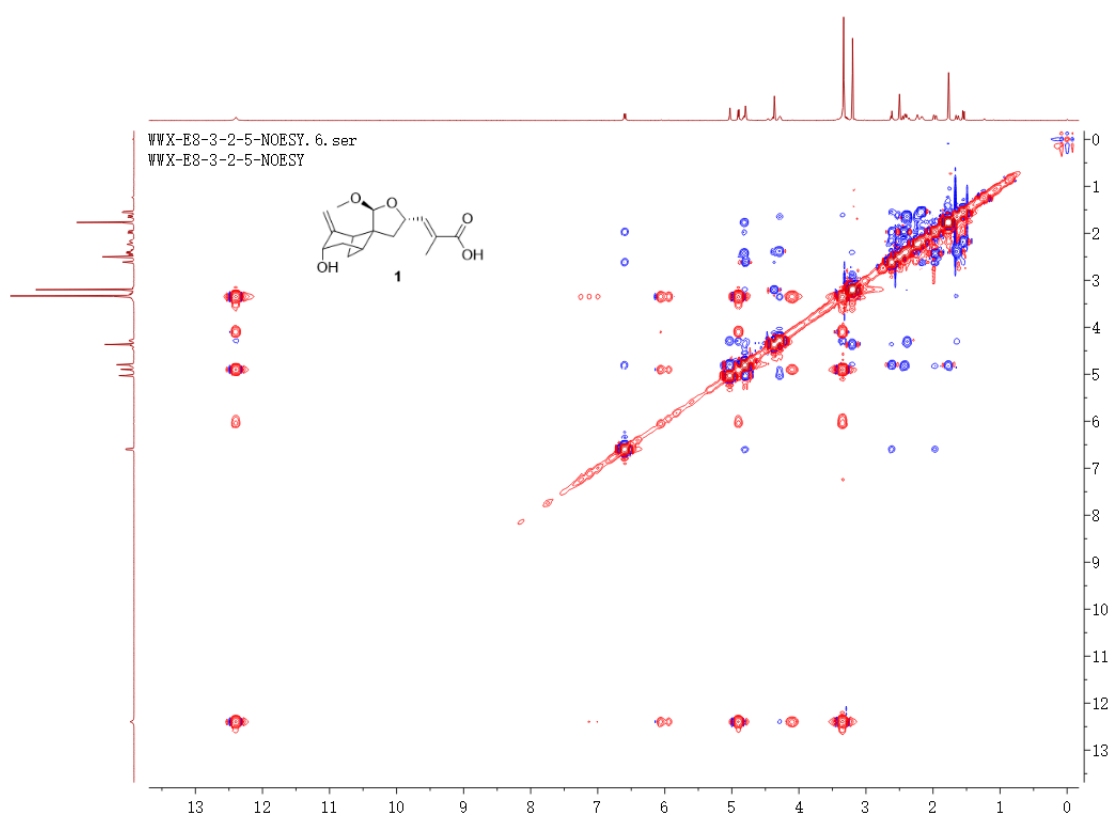

**Figure S11** HRESIMS spectrum of brasilterpene B (**2**)

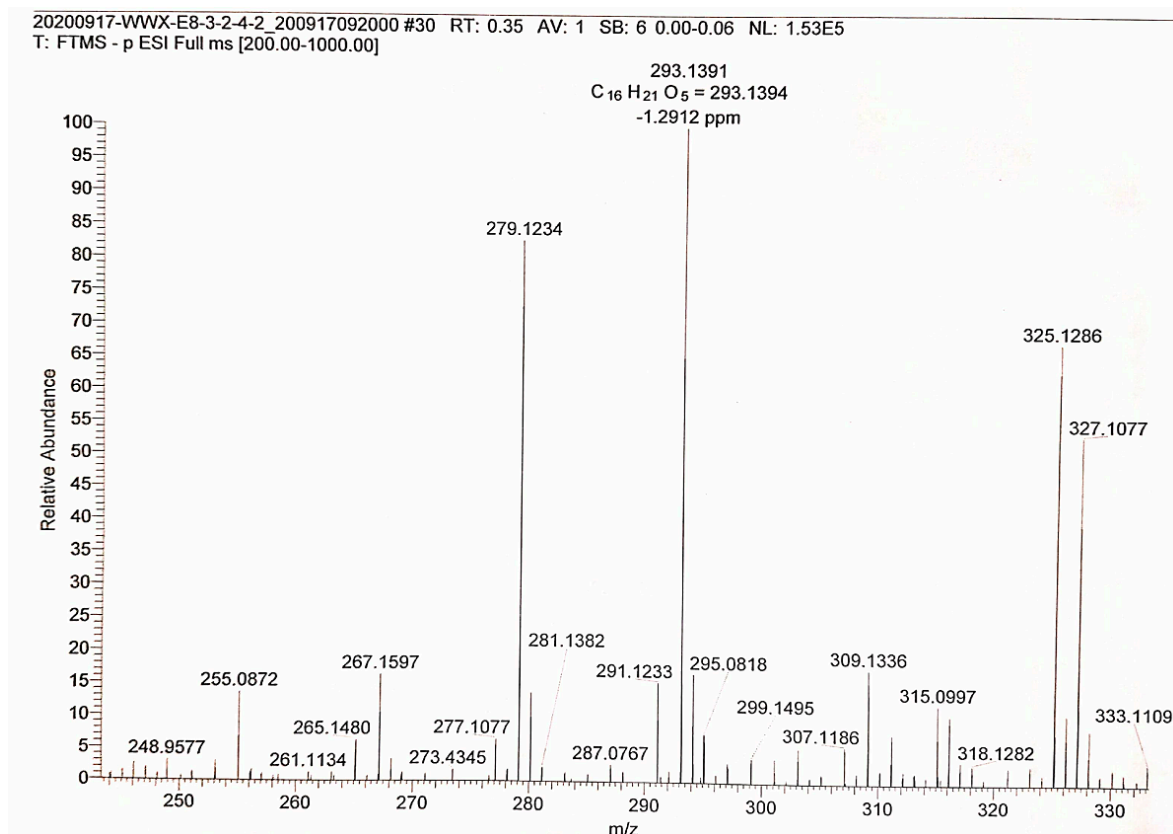

**Figure S12** IR spectrum (KBr) of brasilterpene B (**2**)

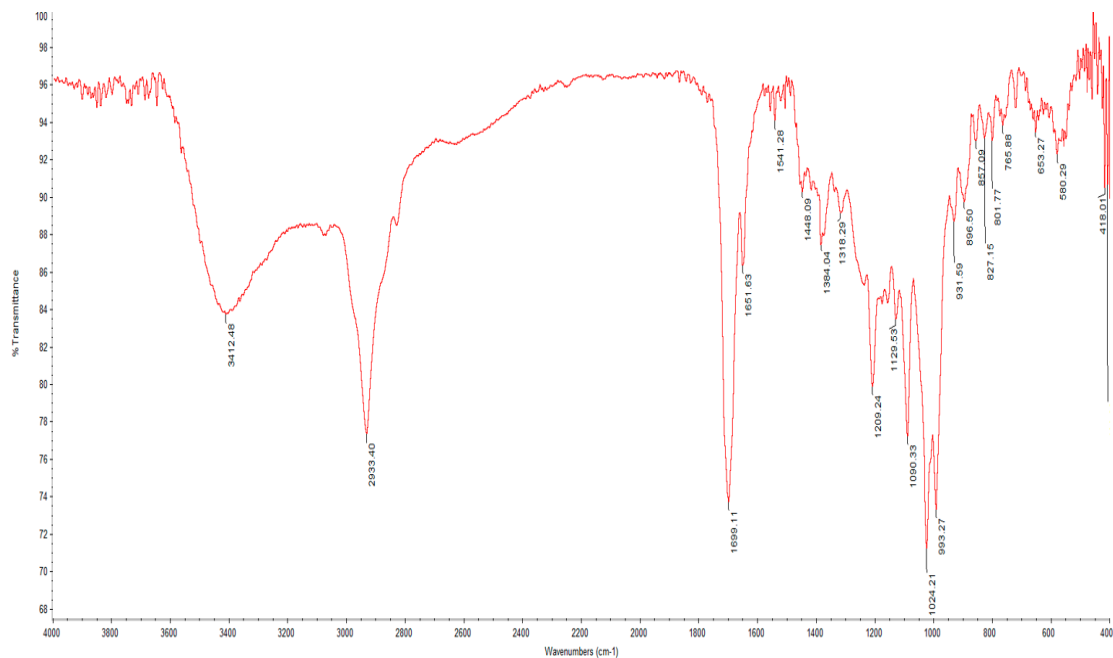

Chemical structure of compound **2** is shown as an inset. The structure is a bicyclic molecule with a hydroxyl group, an acetoxy group, and a vinyl group.

<sup>1</sup>H NMR spectrum (CDCl<sub>3</sub>) of compound **2**. The x-axis represents the chemical shift in ppm, ranging from -1.0 to 3.0. The y-axis represents the intensity of the signal. The spectrum shows several peaks, with integration values provided for some of them.

Integration values (from left to right): 0.98, 0.96, 1.08, 1.06, 1.00, 0.96, 1.08, 1.99, 0.98, 3.02, 0.94.

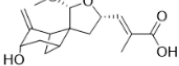
  
**2**



168.6238  
 154.2985  
 143.0316  
 127.8474  
 108.6427  
 104.8512  
 73.5704  
 64.5428  
 64.4357  
 54.3251  
 47.4512  
 40.0203  
 39.8541  
 39.6869  
 39.5199  
 39.3525  
 39.1861  
 39.0182  
 38.4291  
 38.4104  
 36.0312  
 30.9564  
 12.4090

**Figure S15 HSQC spectrum of brasilterpene B (2)**

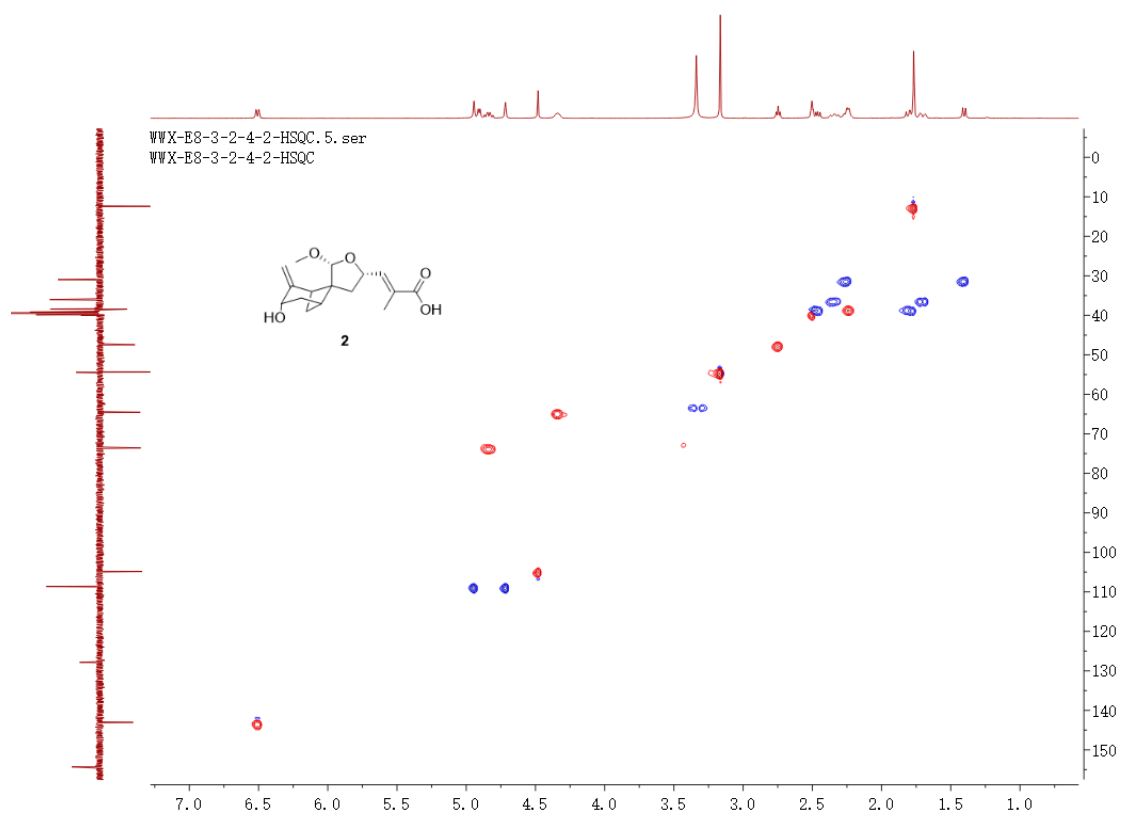

**Figure S16 HMBC spectrum of brasilterpene B (2)**

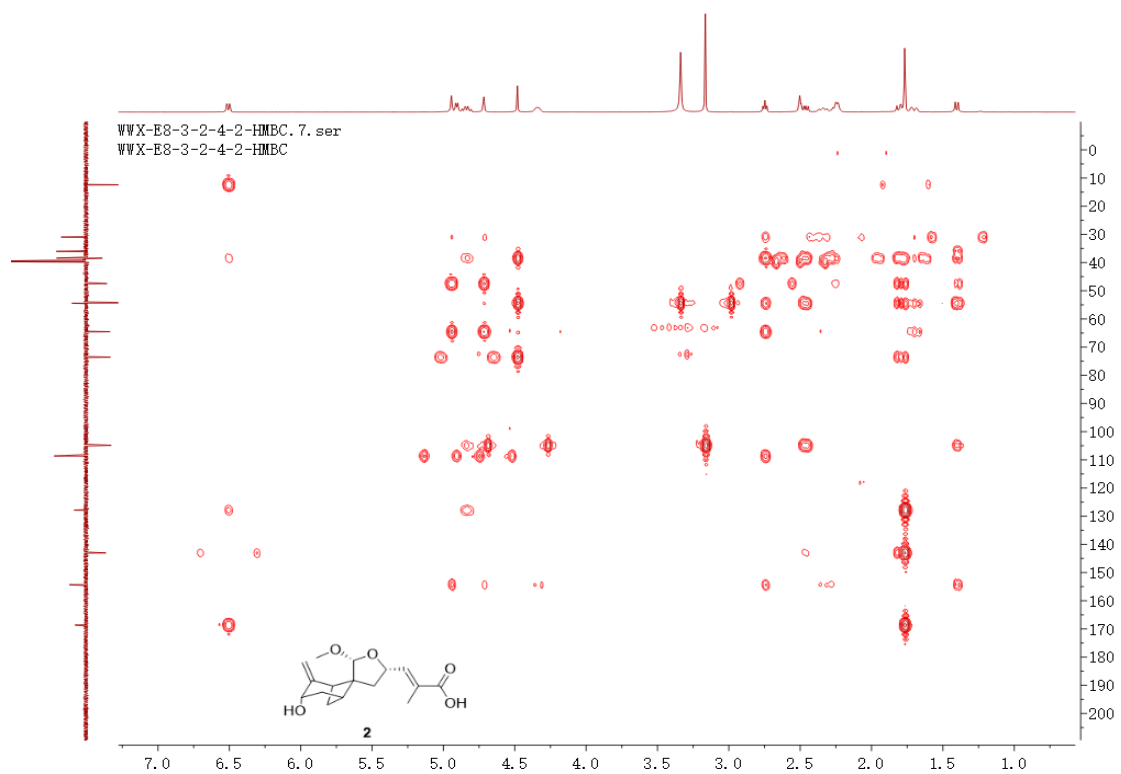

**Figure S17**  $^1\text{H}$ - $^1\text{H}$  COSY spectrum of brasilterpene B (**2**)

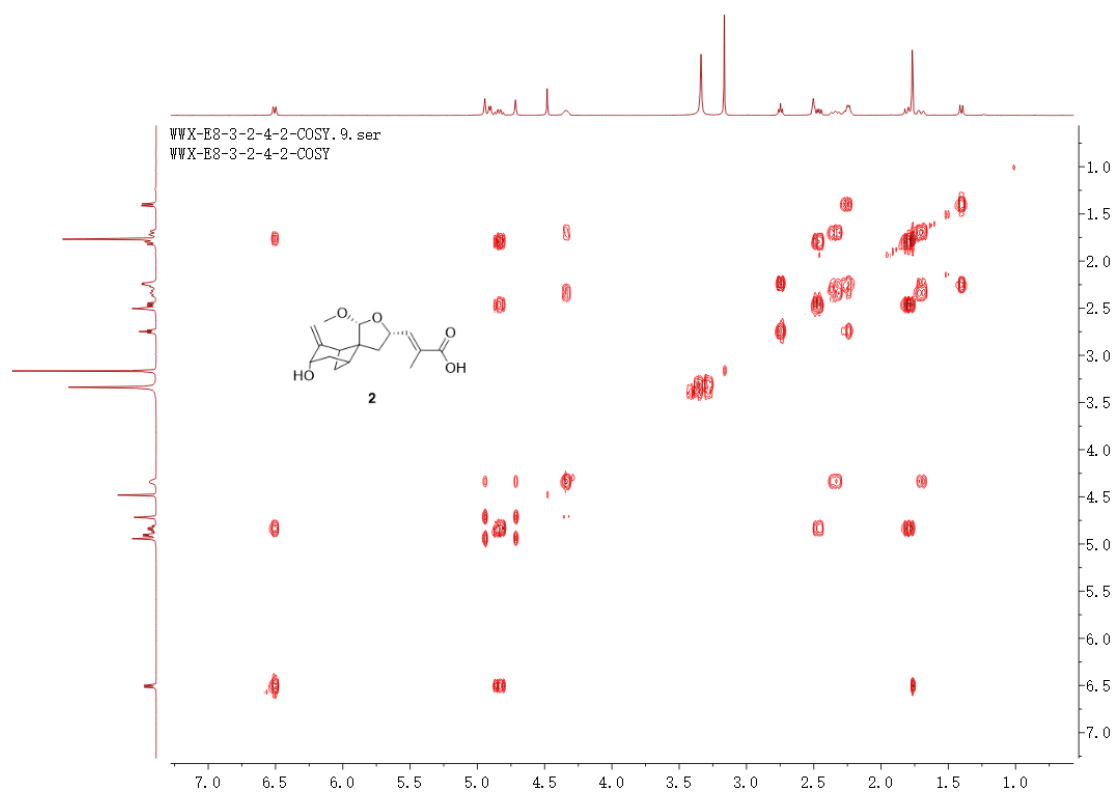

**Figure S18** NOESY spectrum of brasilterpene B (**2**)

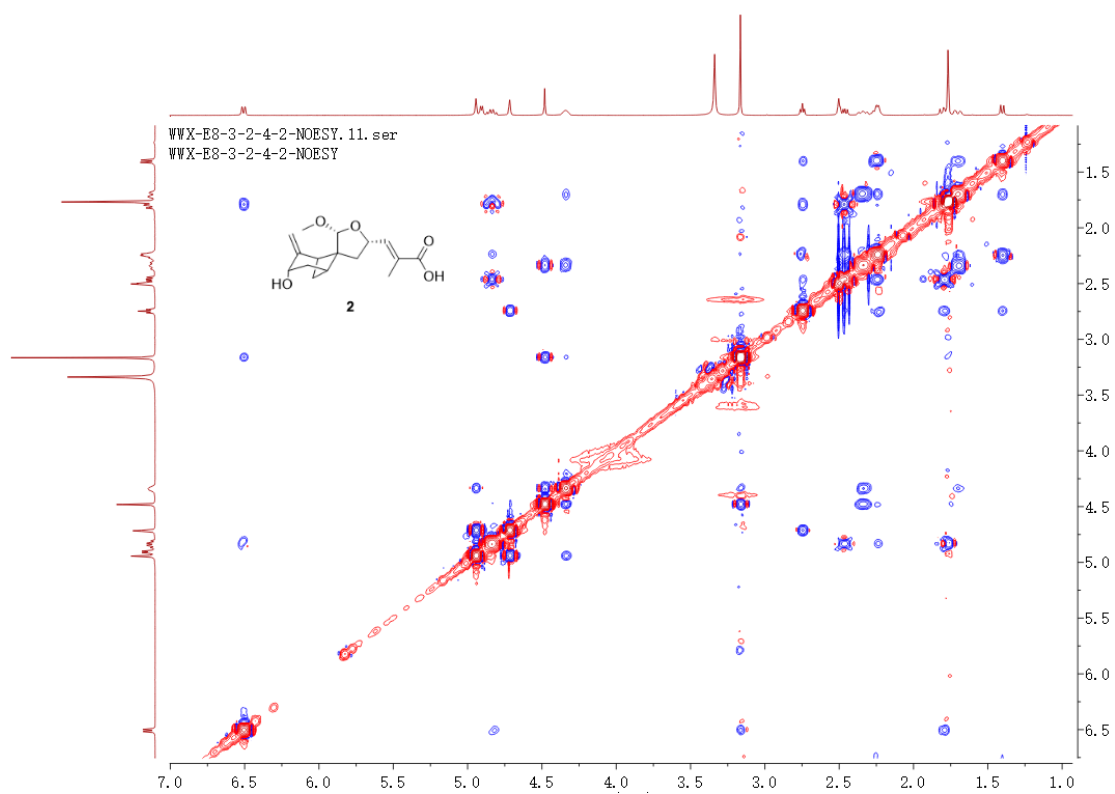

**Figure S19** HRESIMS spectrum of brasilterpene C (**3**)

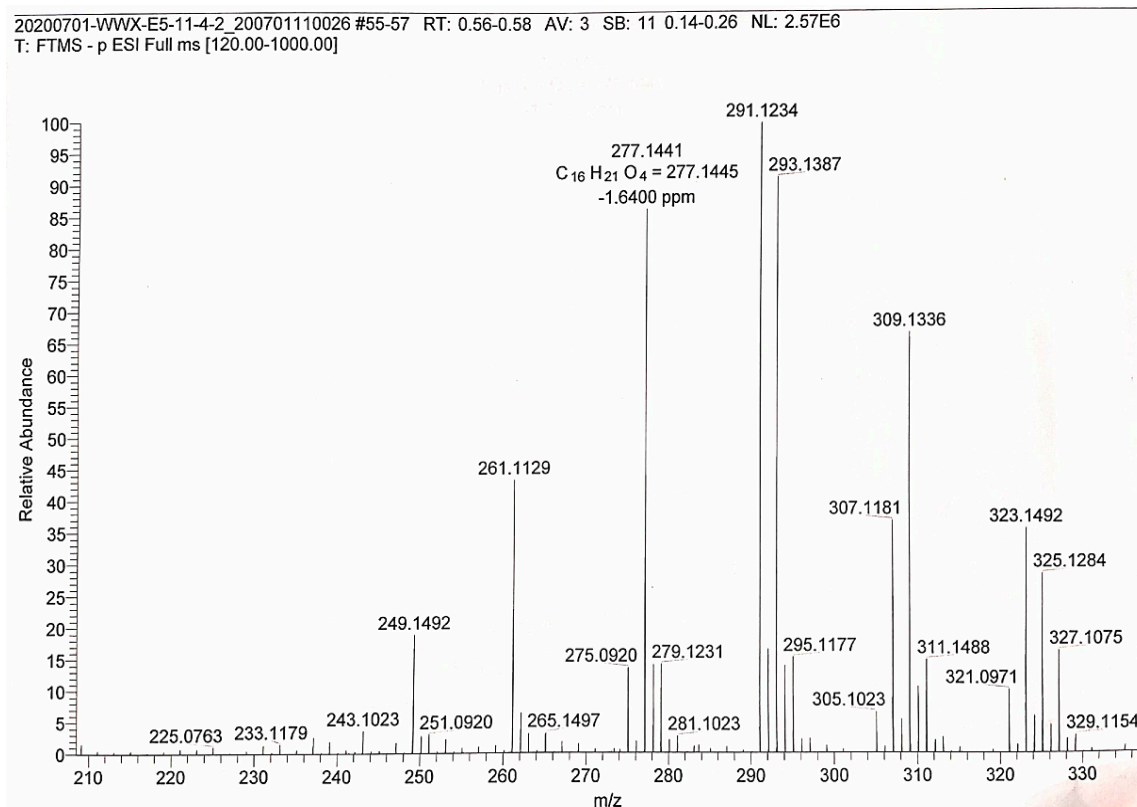

**Figure S20** IR spectrum (KBr) of brasilterpene C (**3**)

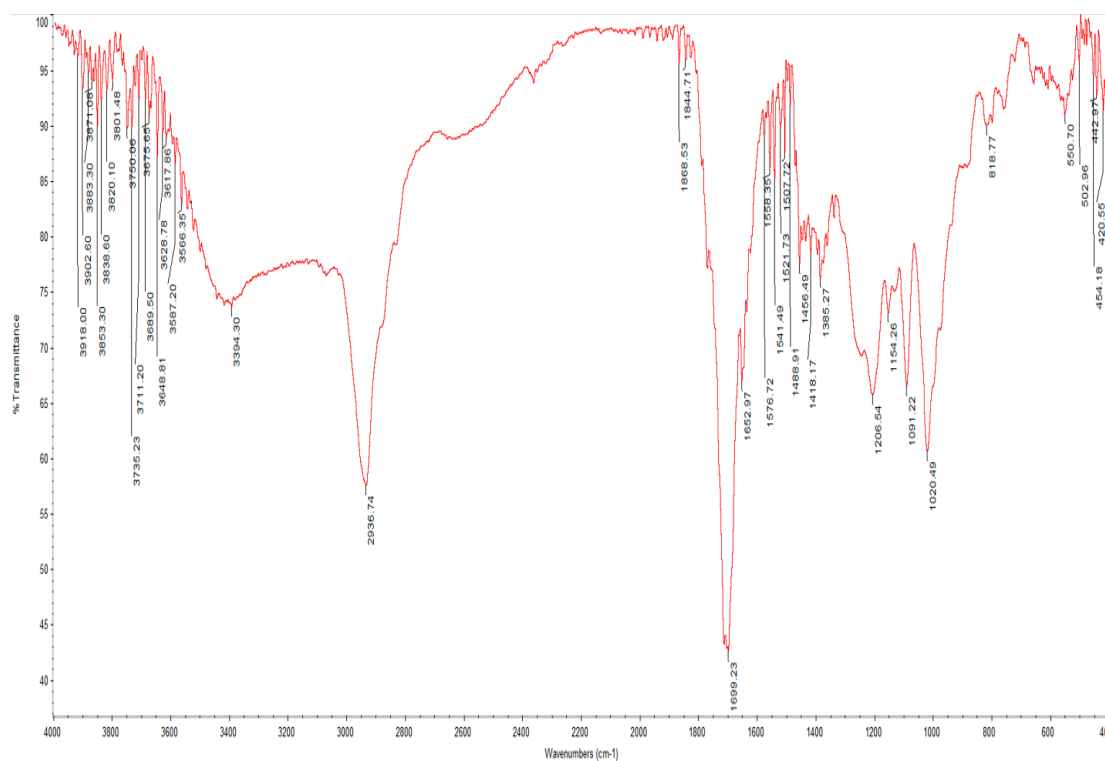



**Figure S21**  $^1\text{H}$  NMR spectrum (DMSO- $d_6$ , 500 MHz) of brasilterpene C (**3**)

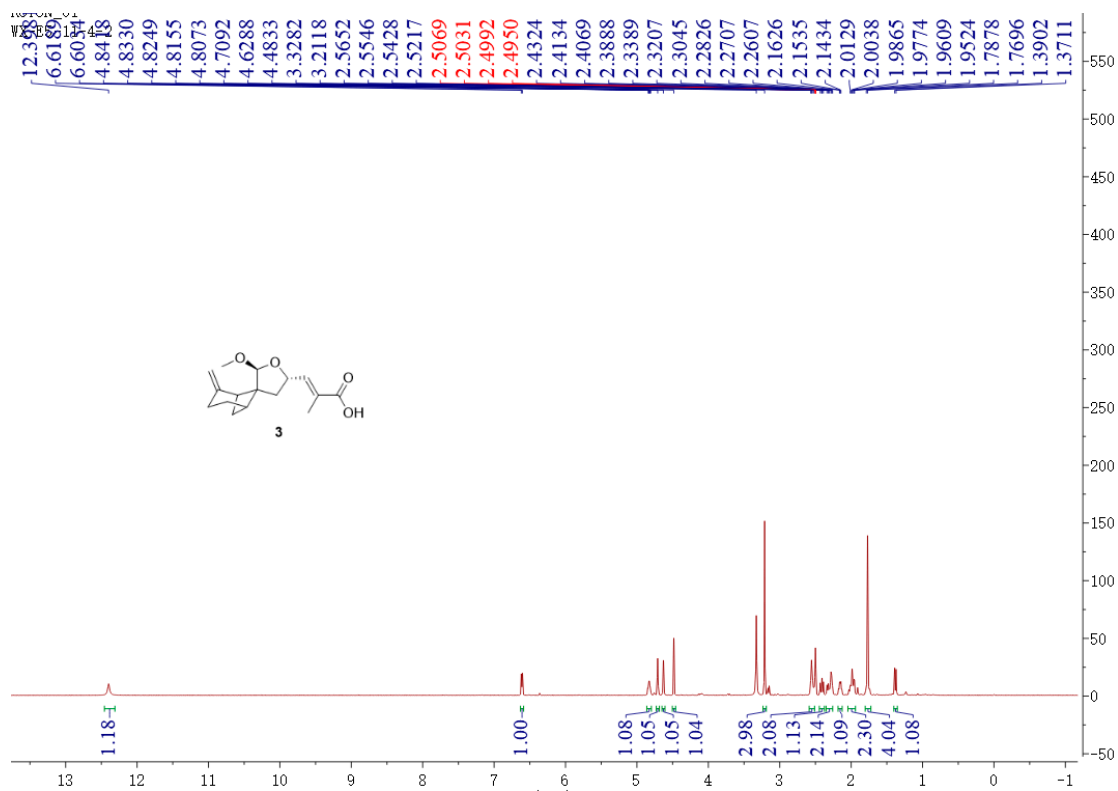

**Figure S22**  $^{13}\text{C}$  NMR spectrum (DMSO- $d_6$ , 100 MHz) of brasilterpene C (**3**)

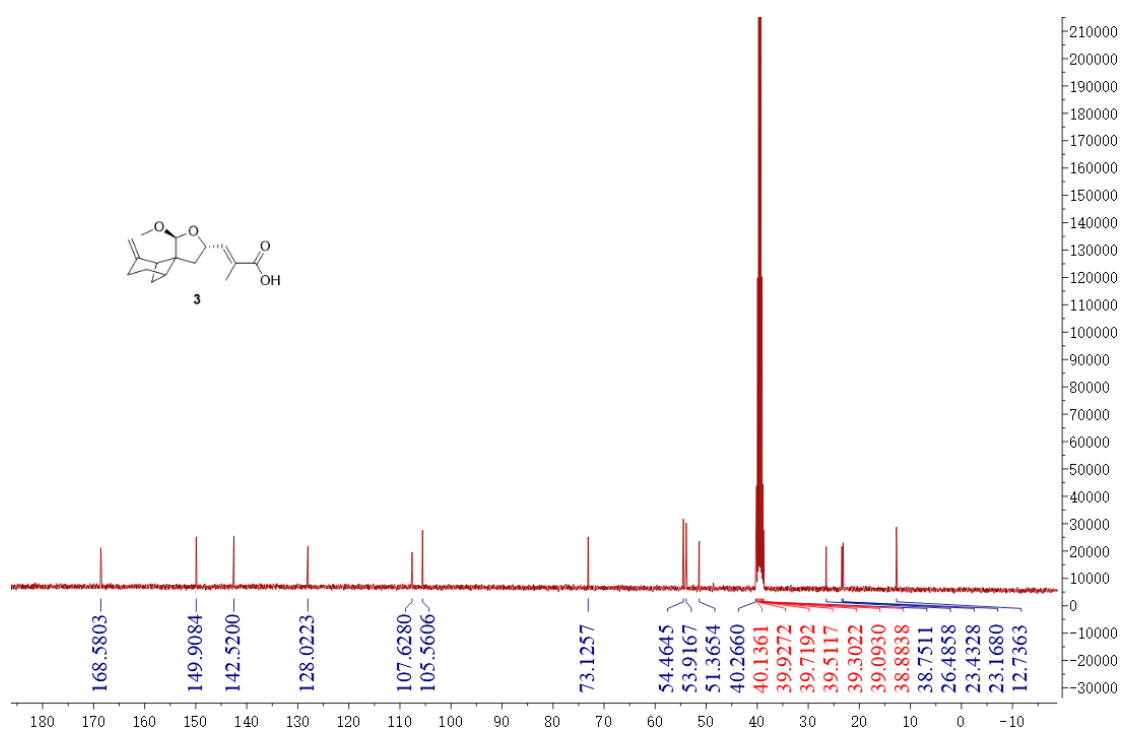

**Figure S23** HSQC spectrum of brasilterpene C (**3**)

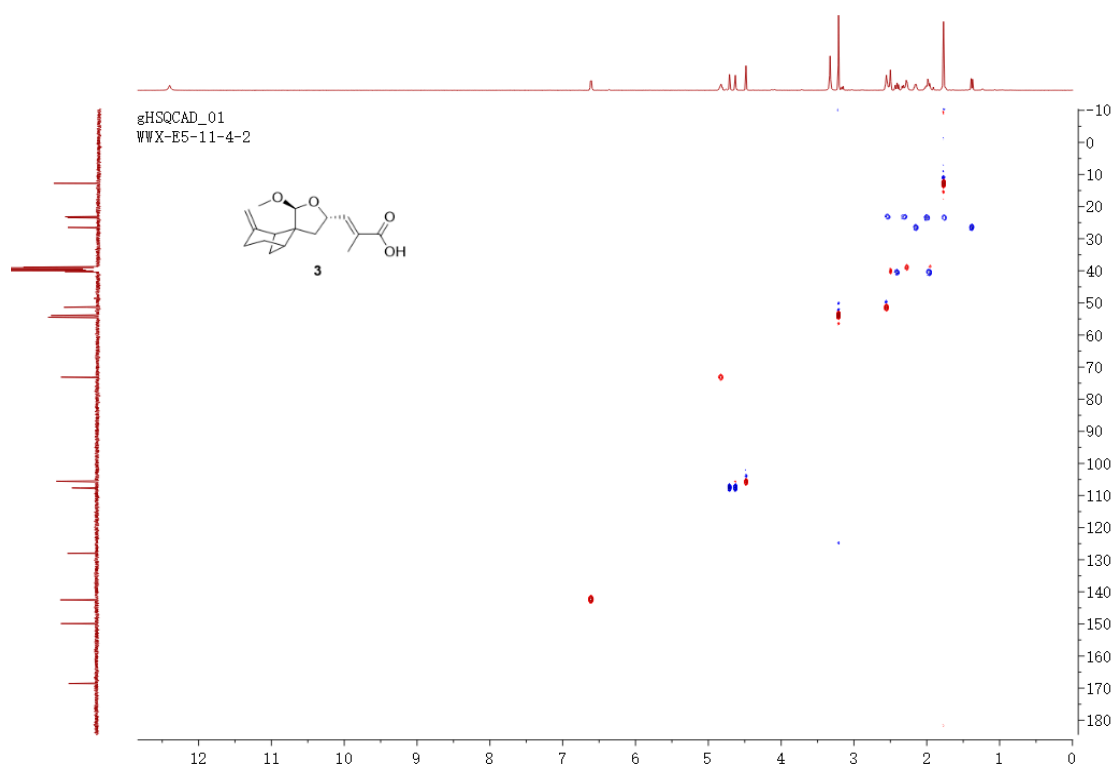

**Figure S24** HMBC spectrum of brasilterpene C (**3**)

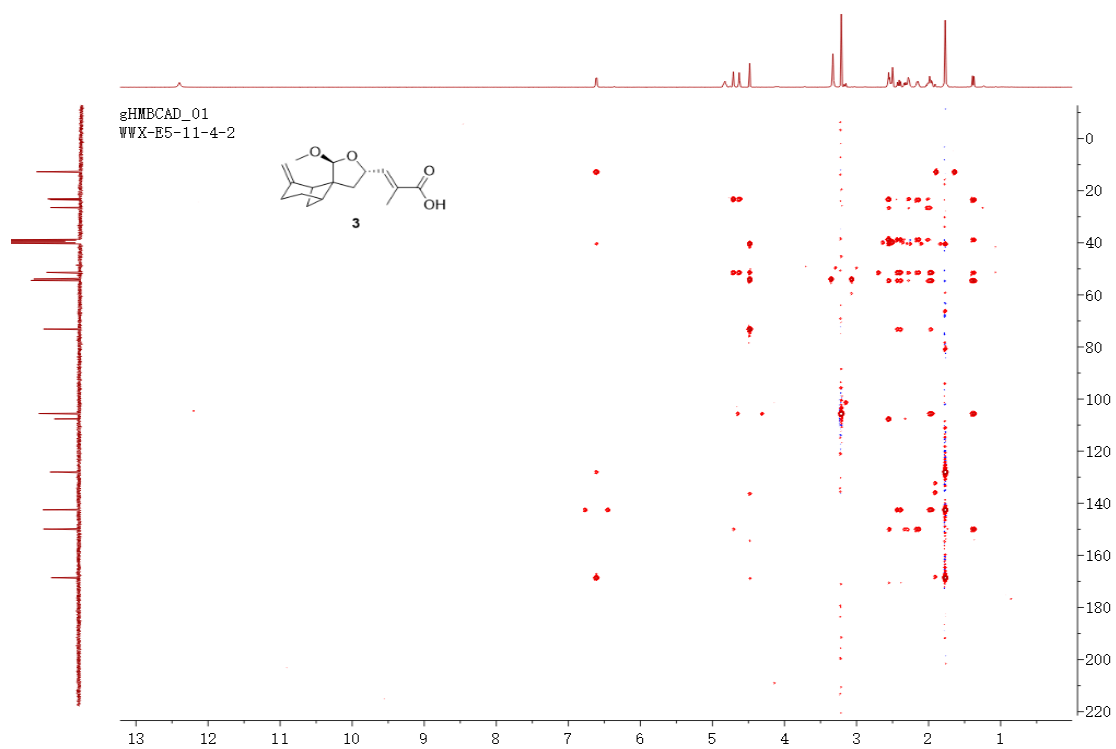

**Figure S25**  $^1\text{H}$ - $^1\text{H}$  COSY spectrum of brasilterpene C (**3**)

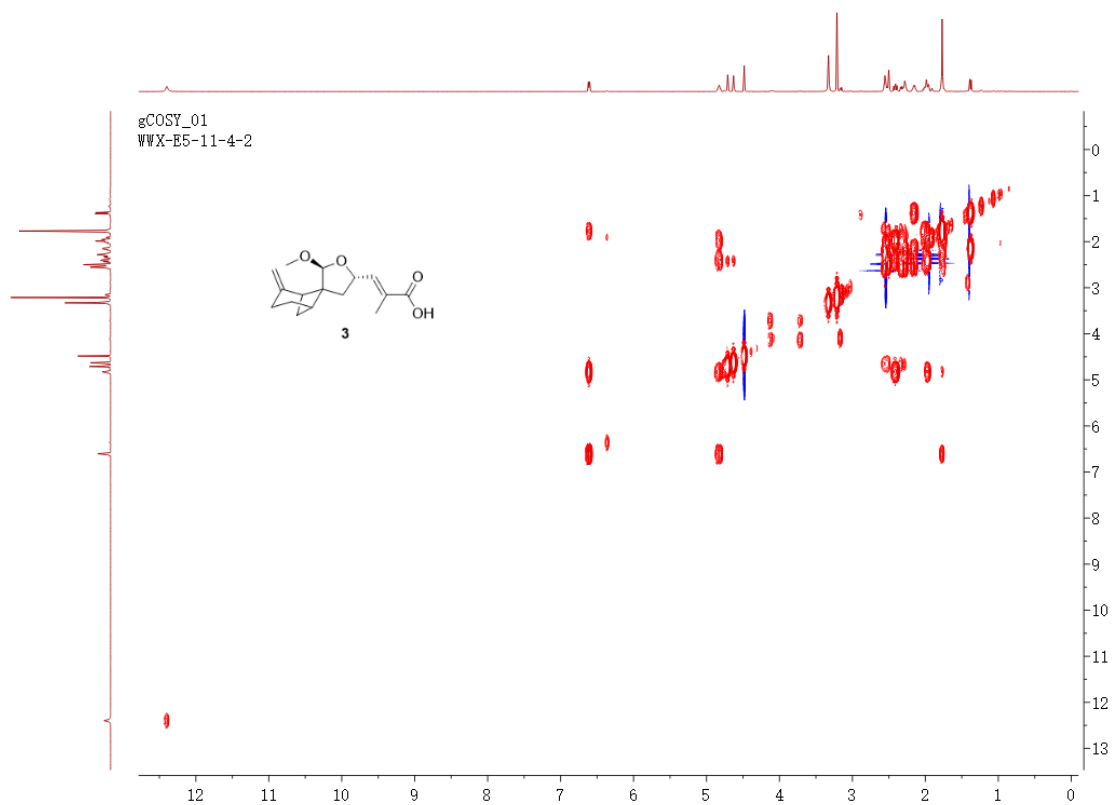

**Figure S26** NOESY spectrum of brasilterpene C (3)

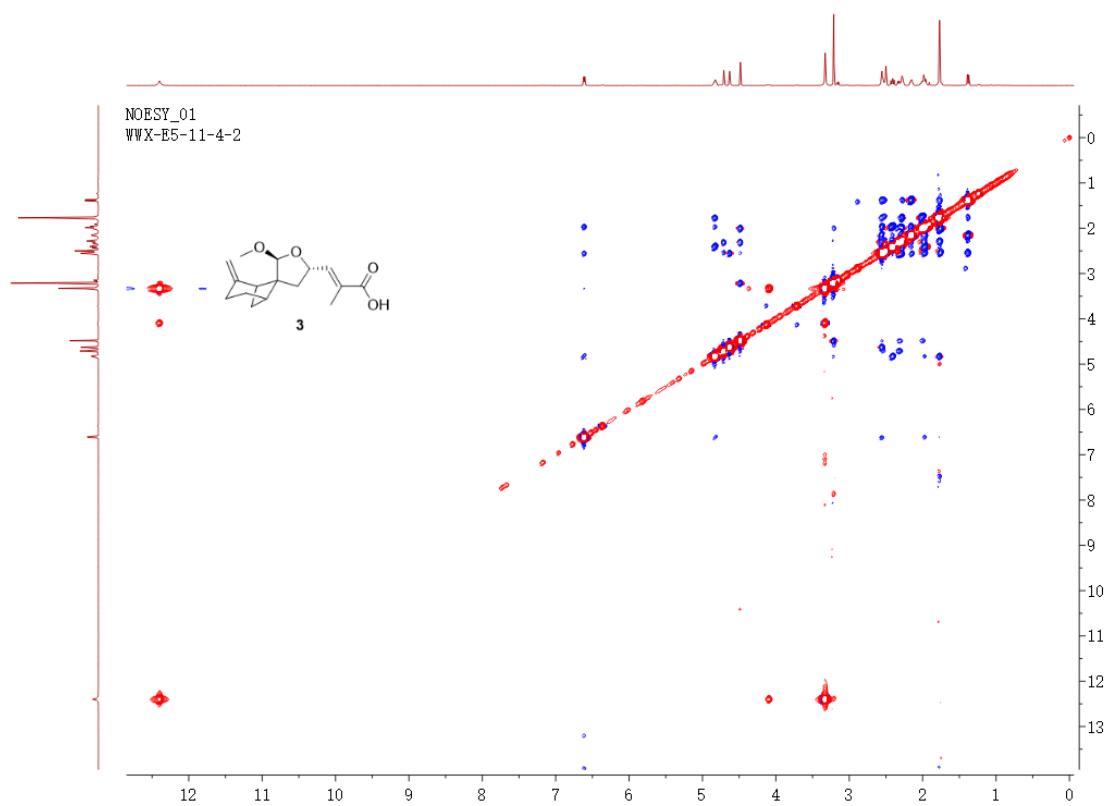

**Figure S27** HRESIMS spectrum of brasilterpene D (4)

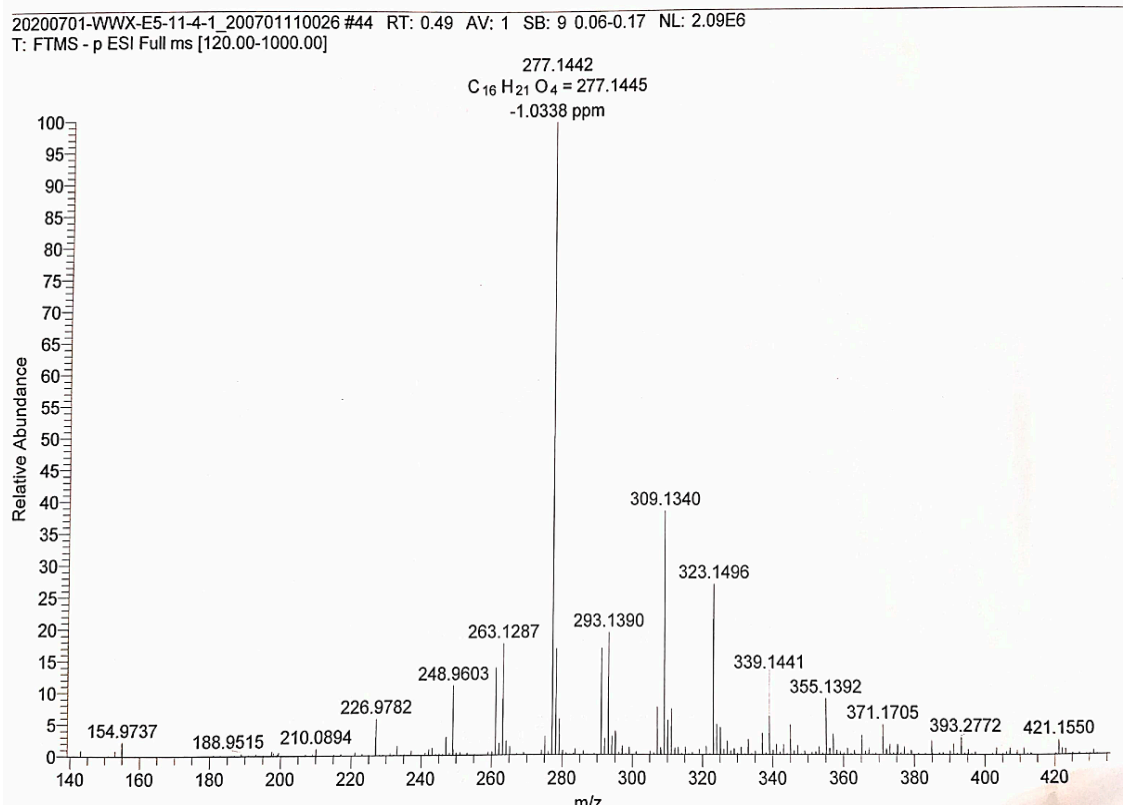

**Figure S28** IR spectrum (KBr) of brasilterpene D (**4**)

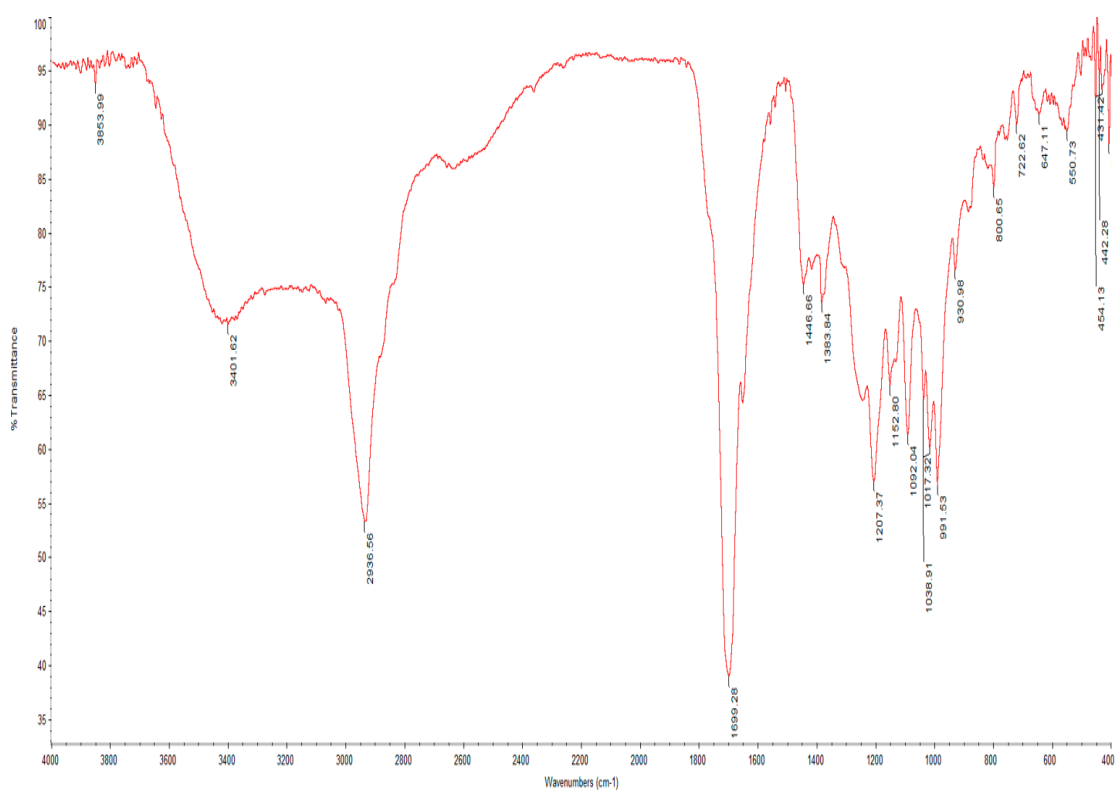

**Figure S29**  $^1H$  NMR spectrum (DMSO- $d_6$ , 500 MHz) of brasilterpene D (**4**)

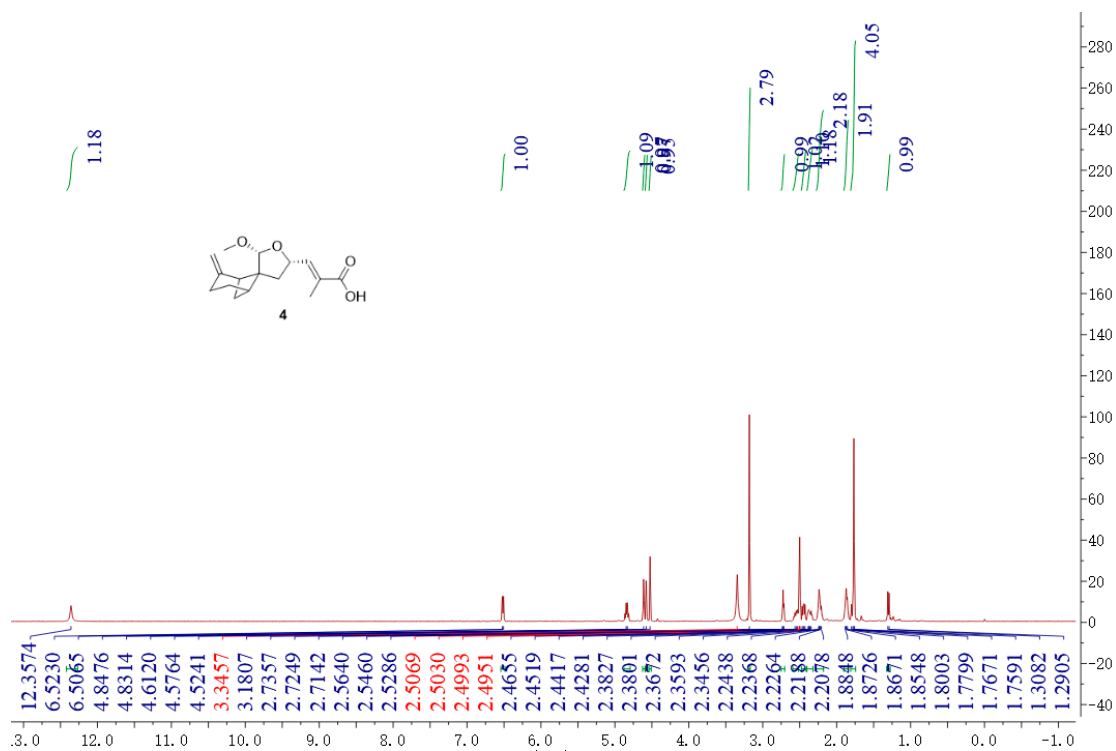

**Figure S30** <sup>13</sup>C NMR spectrum (DMSO-*d*<sub>6</sub>, 100 MHz) of brasilterpene D (4)

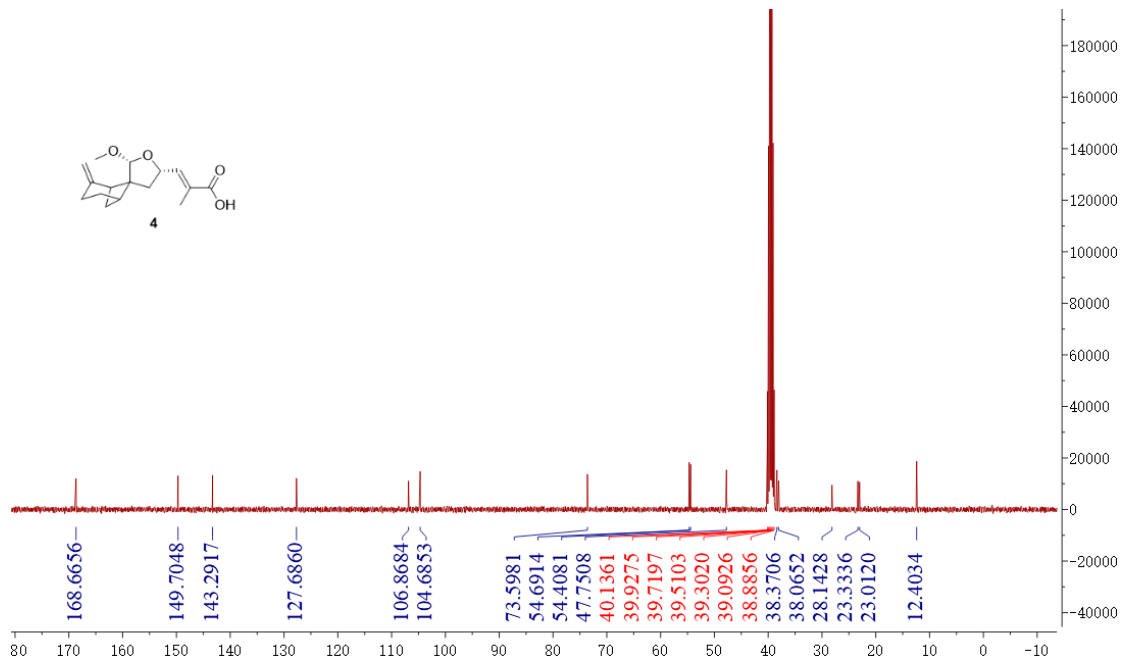

**Figure S31** HSQC spectrum of brasilterpene D (**4**)

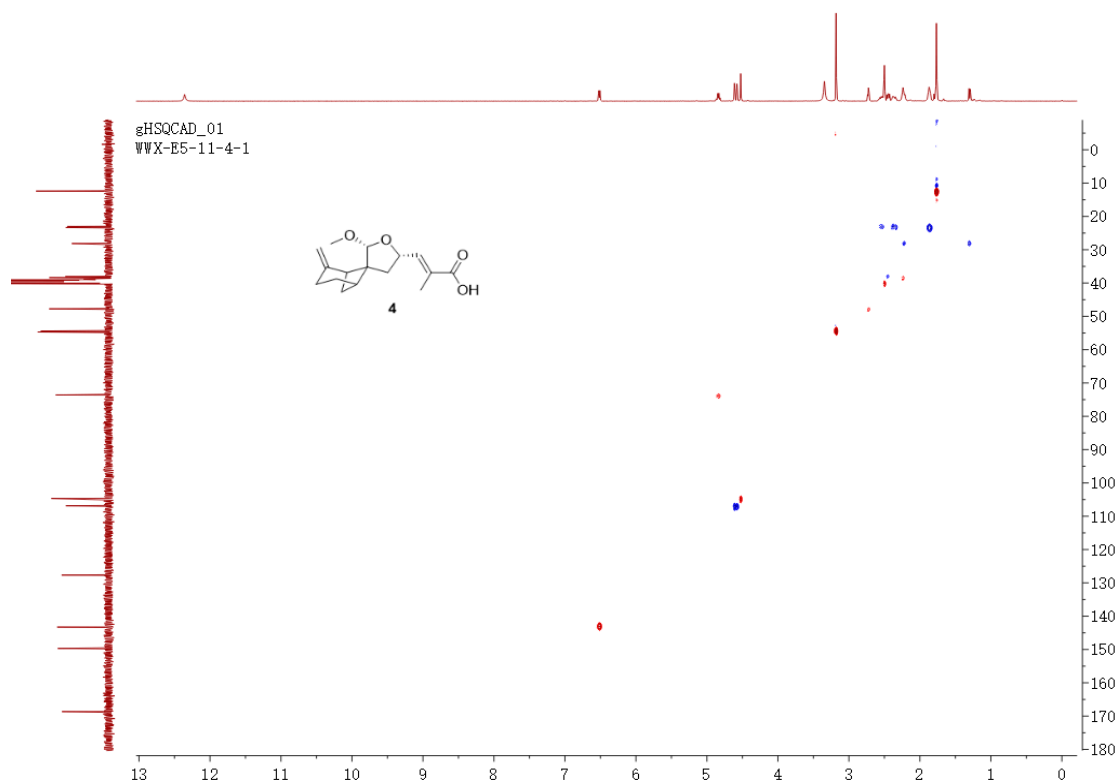

**Figure S32** HMBC spectrum of brasilterpene D (**4**)

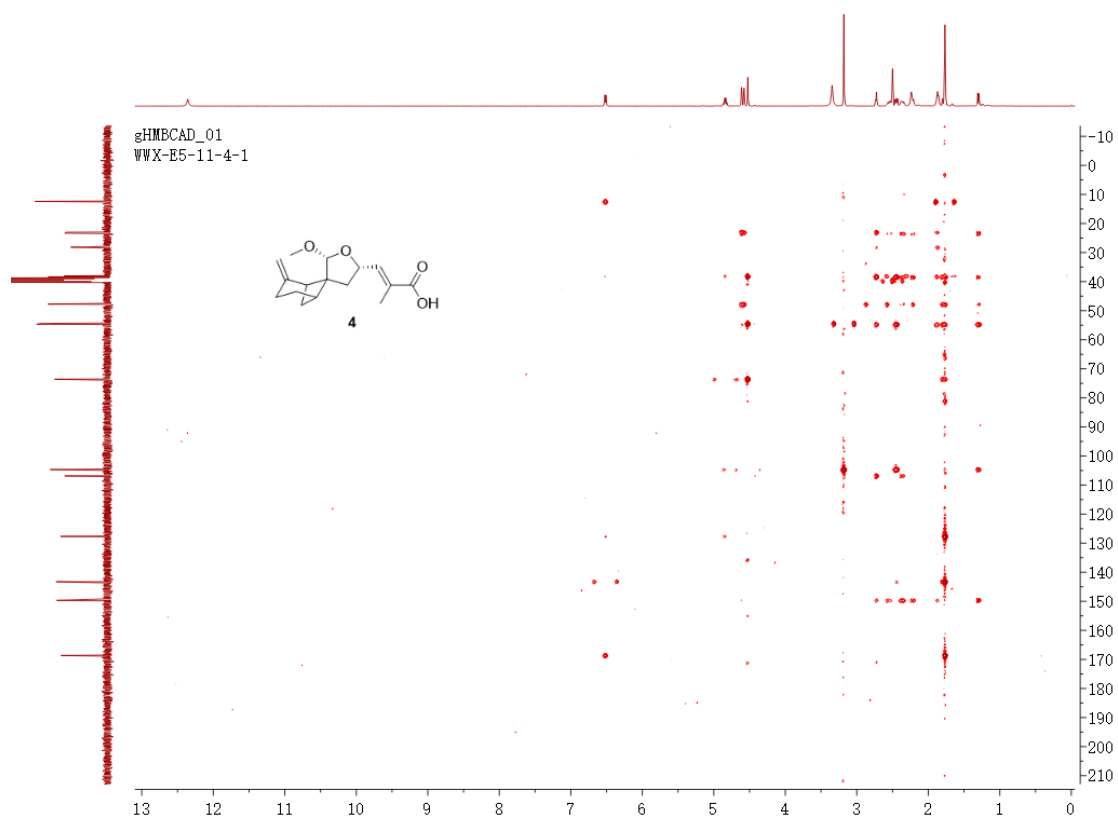

**Figure S33**  $^1\text{H}$ - $^1\text{H}$  COSY spectrum of brasilterpene D (**4**)

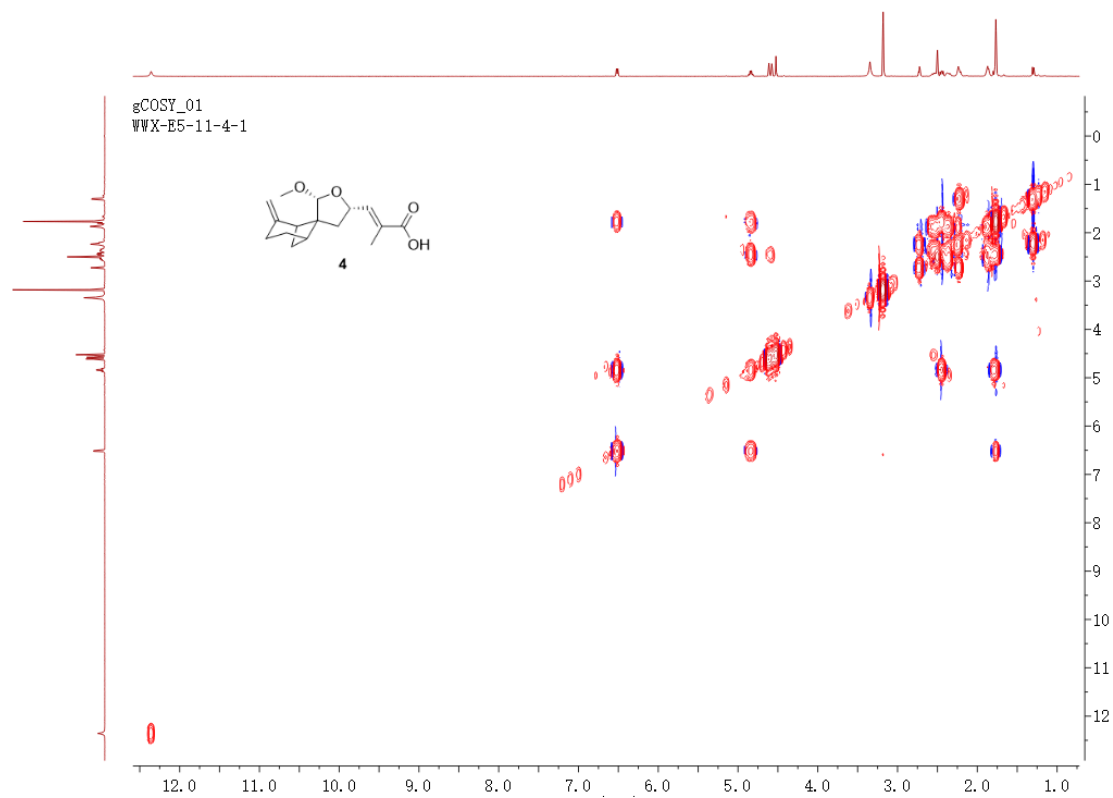

**Figure S34** NOESY spectrum of brasilterpene D (4)

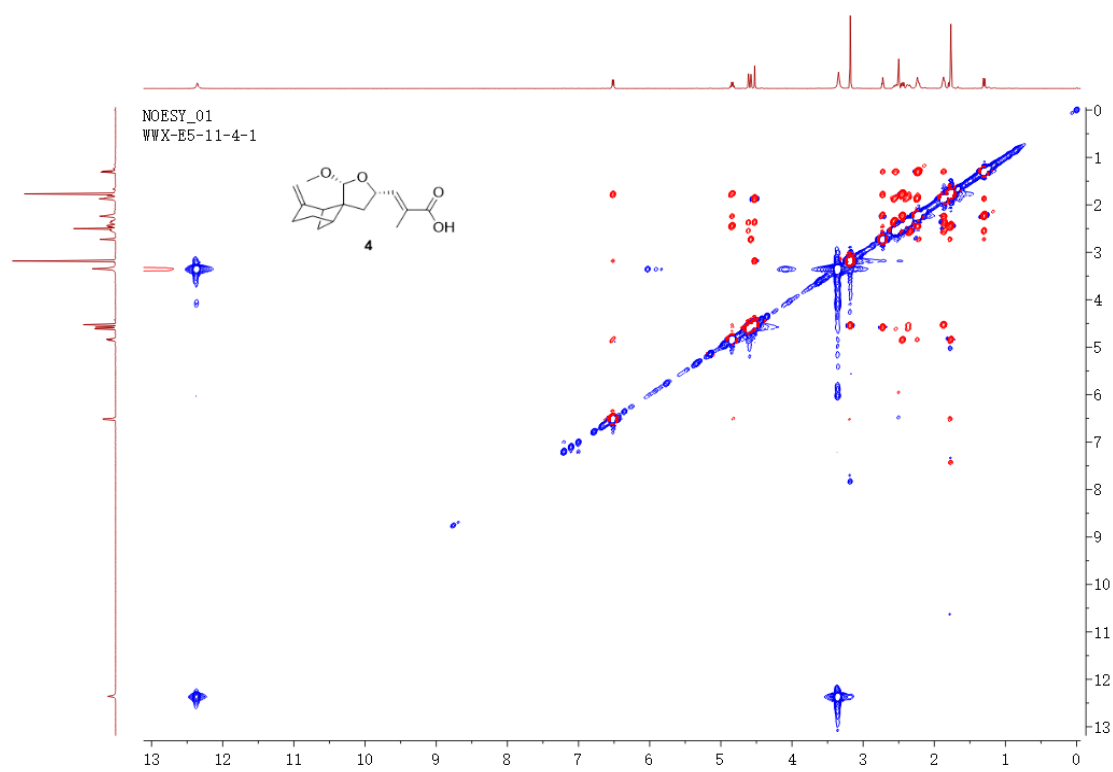

**Figure S35** HRESIMS spectrum of brasilterpene E (5)

20200917-WWX-E5-12-3-4\_200917093223 #23 RT: 0.28 AV: 1 NL: 6.21E5  
T: FTMS - p ESI Full ms [200.00-1000.00]

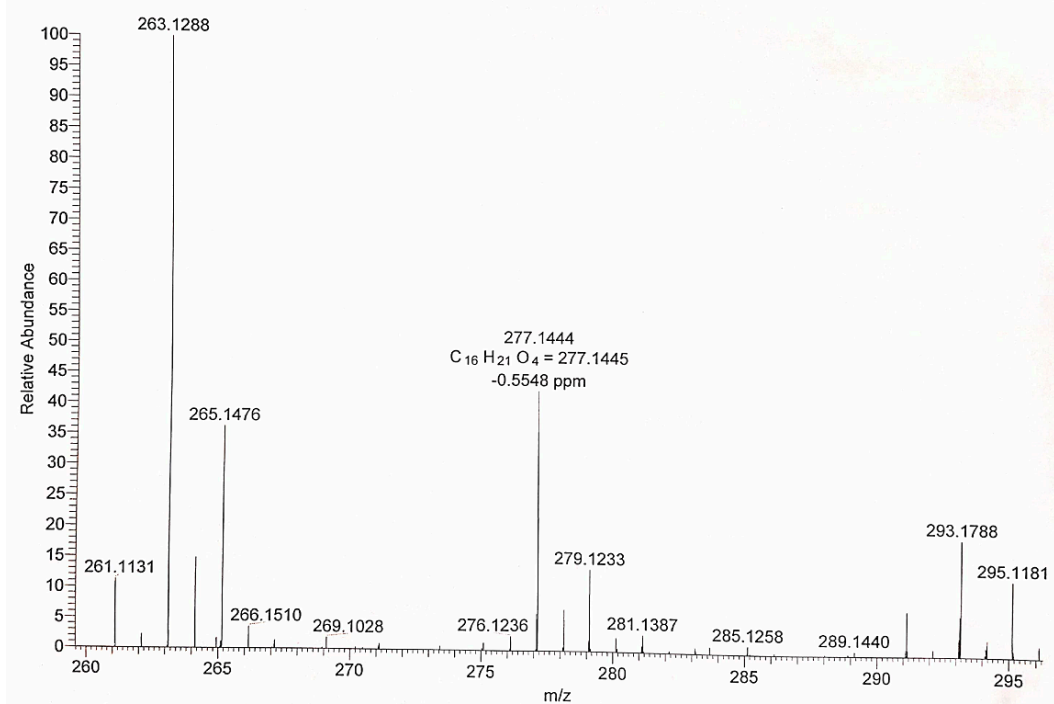

**Figure S36** IR spectrum (KBr) of brasilterpene E (5)

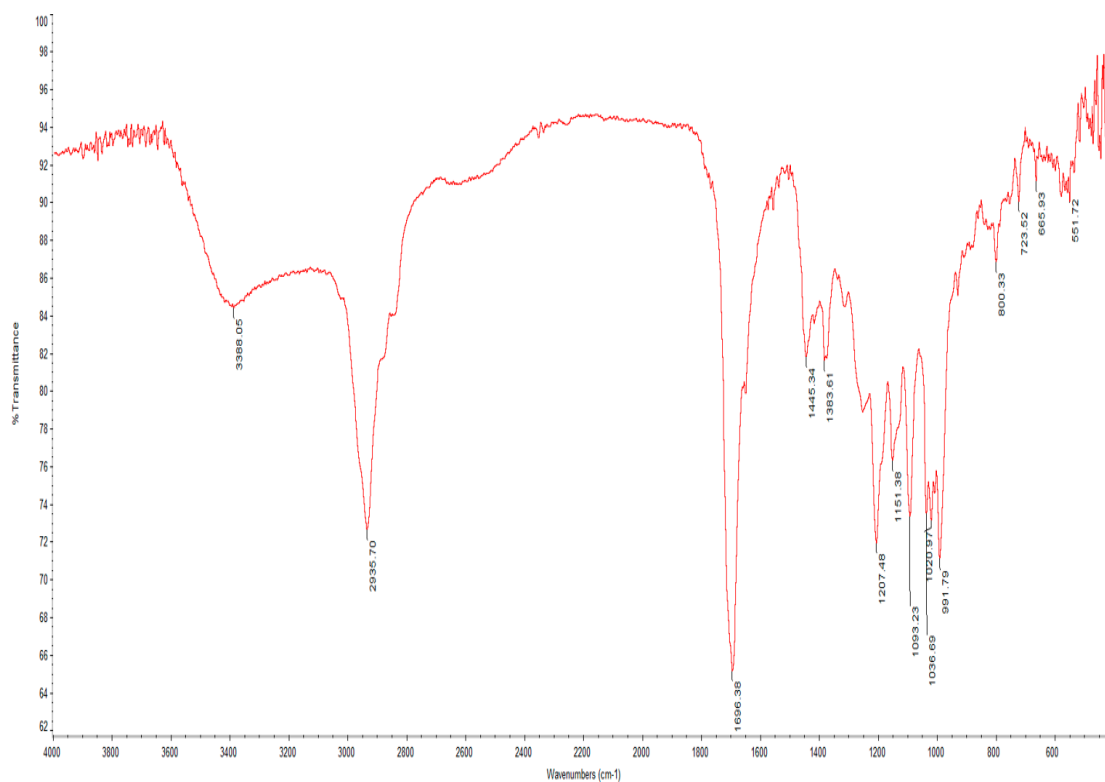



**Figure S37**  $^1\text{H}$  NMR spectrum (DMSO- $d_6$ , 600 MHz) of brasilterpene E (**5**)

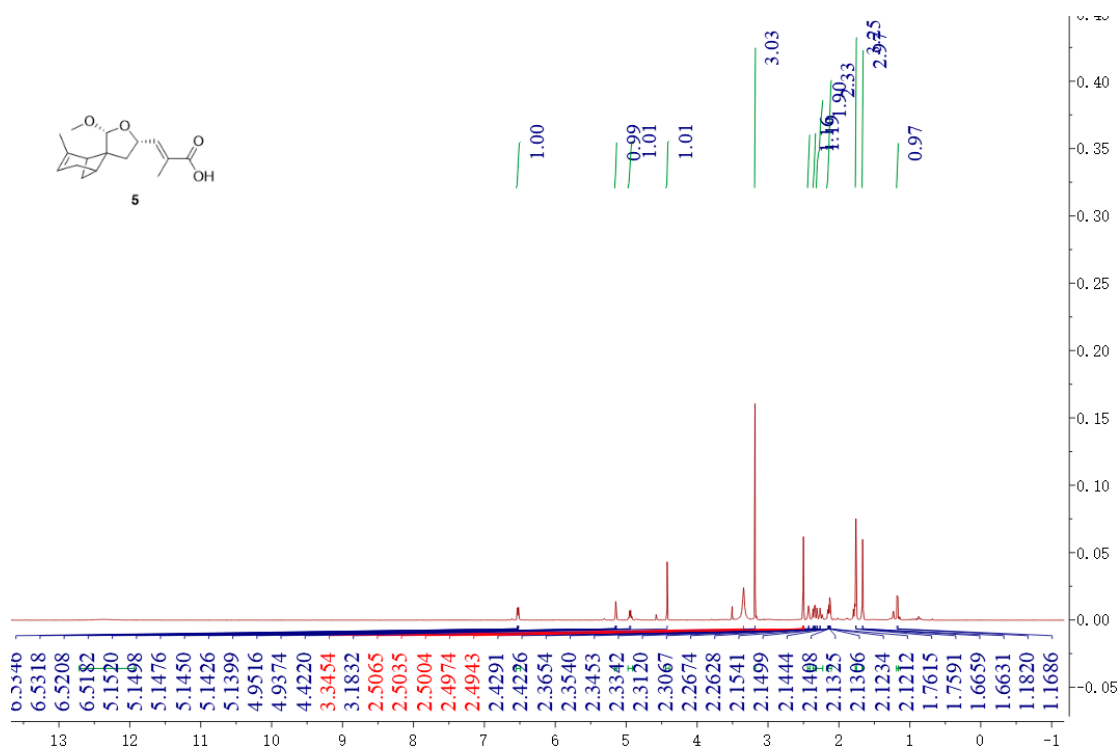

**Figure S38** DEPTQ-NMR spectrum (DMSO- $d_6$ , 100 MHz) of brasilterpene E (**5**)

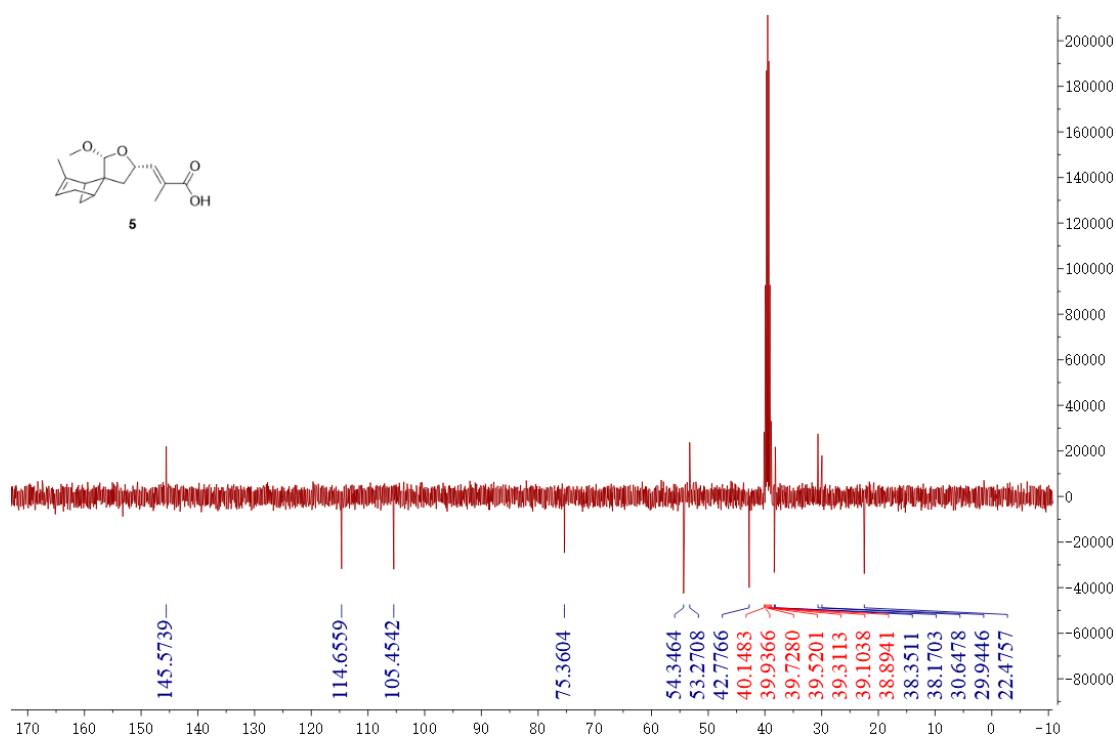

**Figure S39** HSQC spectrum of brasilterpene E (**5**)

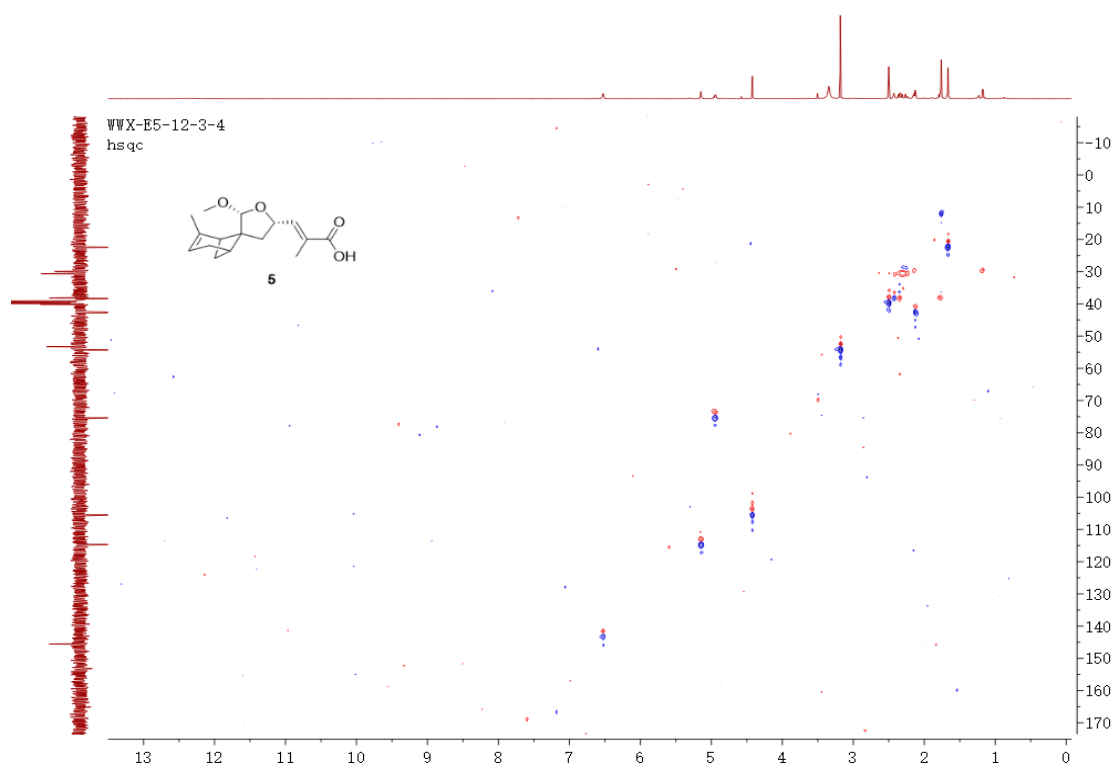

**Figure S40** HMBC spectrum of brasilterpene E (**5**)

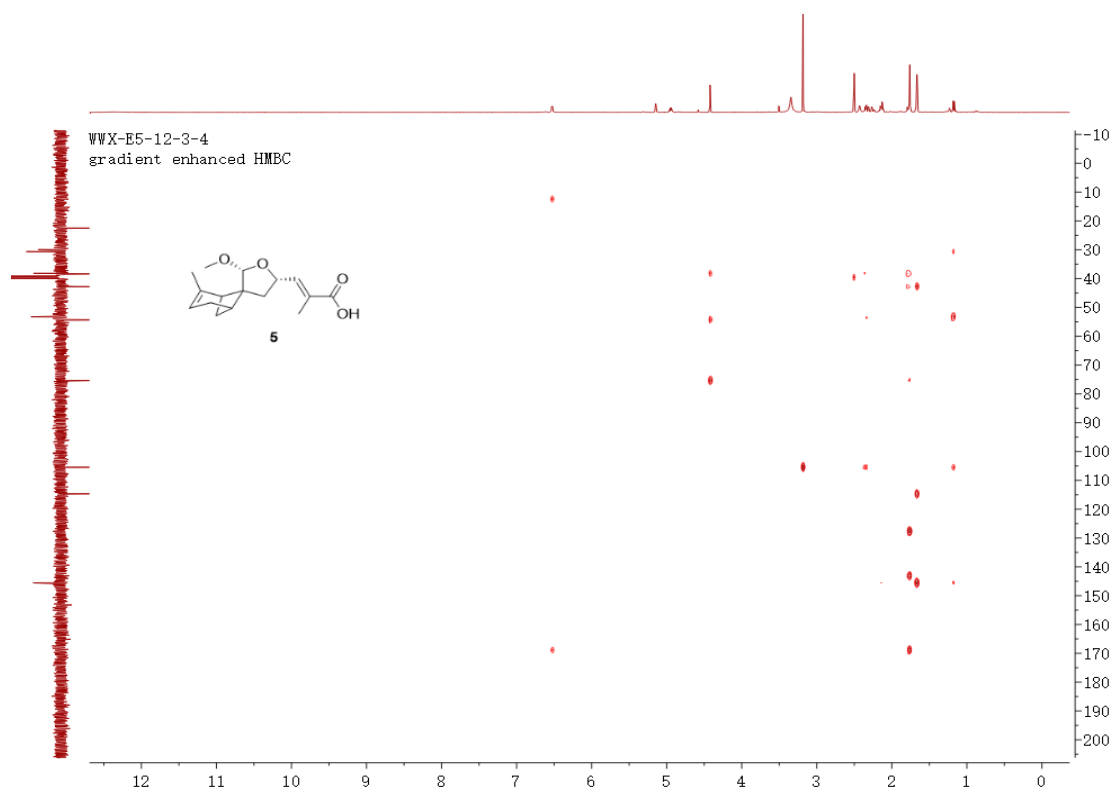

**Figure S41**  $^1\text{H}$ - $^1\text{H}$  COSY spectrum of brasilterpene E (**5**)

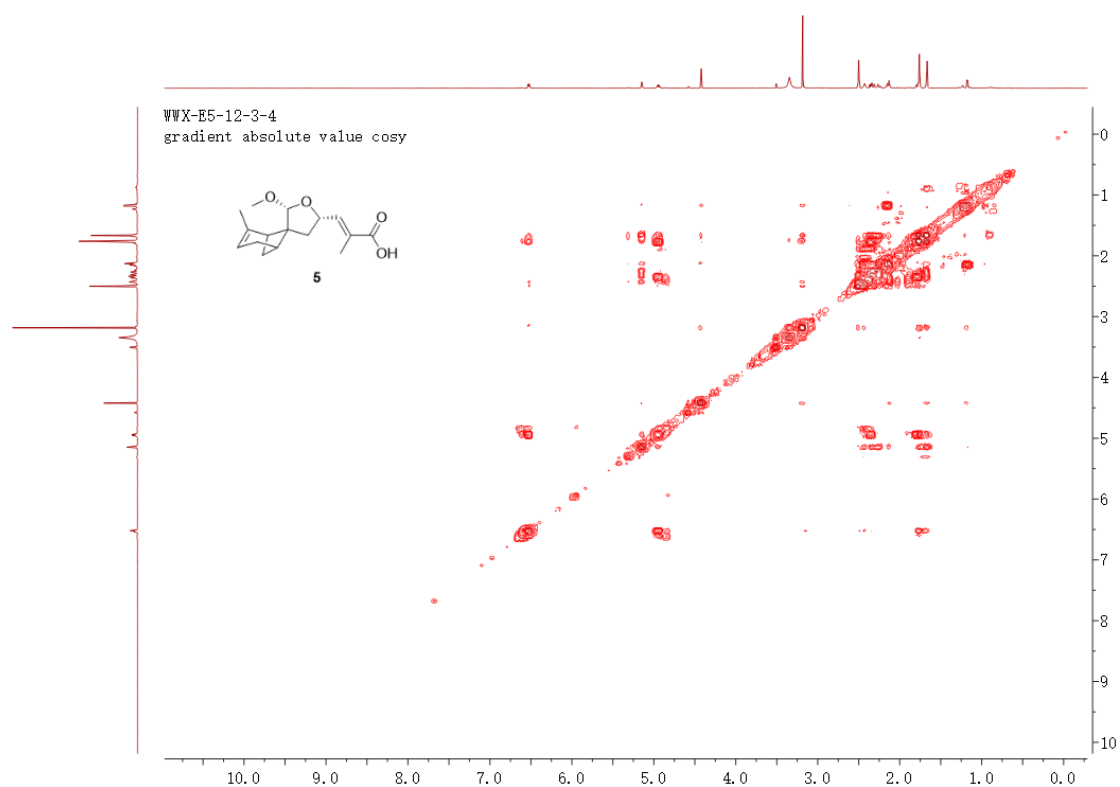

**Figure S42** NOESY spectrum of brasilterpene E (**5**)

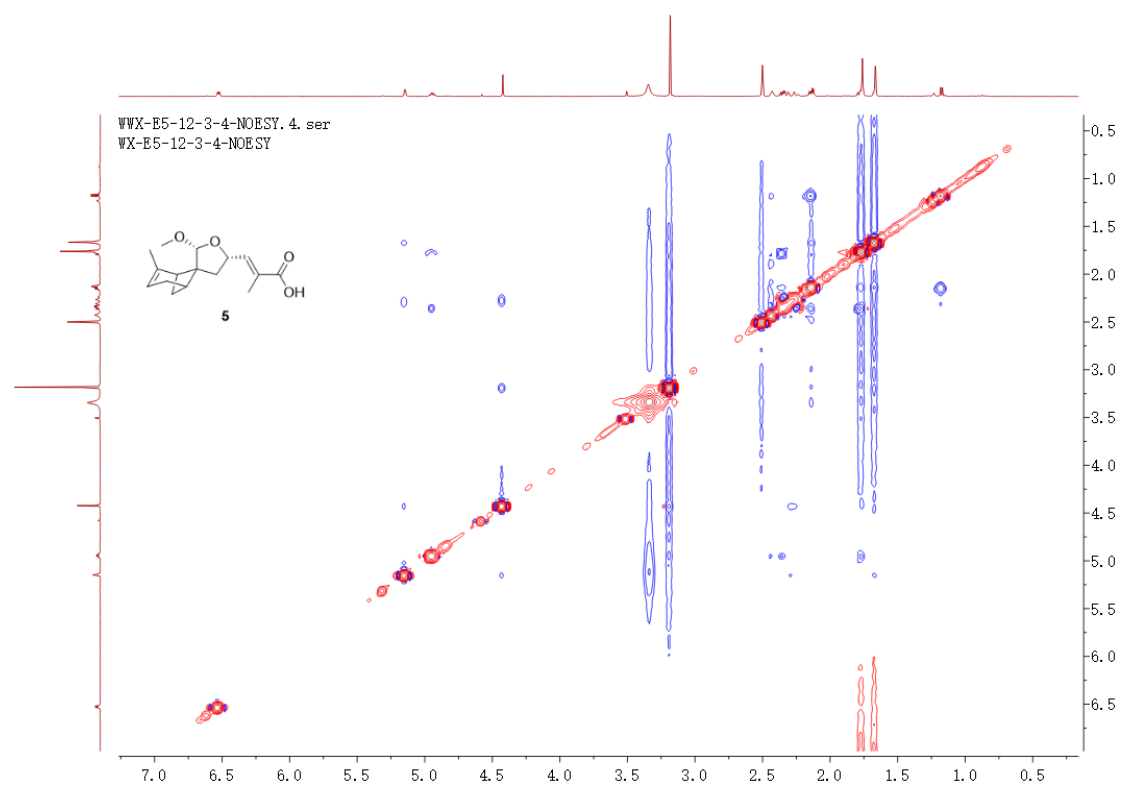

**Figure S43** DFT-optimized structures for low-energy conformers of **1a** (1*S*,3*R*,5*R*,6*S*,9*S*,14*S*-1) at B3LYP/6-31+G(d) level in DMSO (PCM).

Conformer populations were calculated using the Gibbs free energy and Boltzmann population at 298 K estimated thereof.

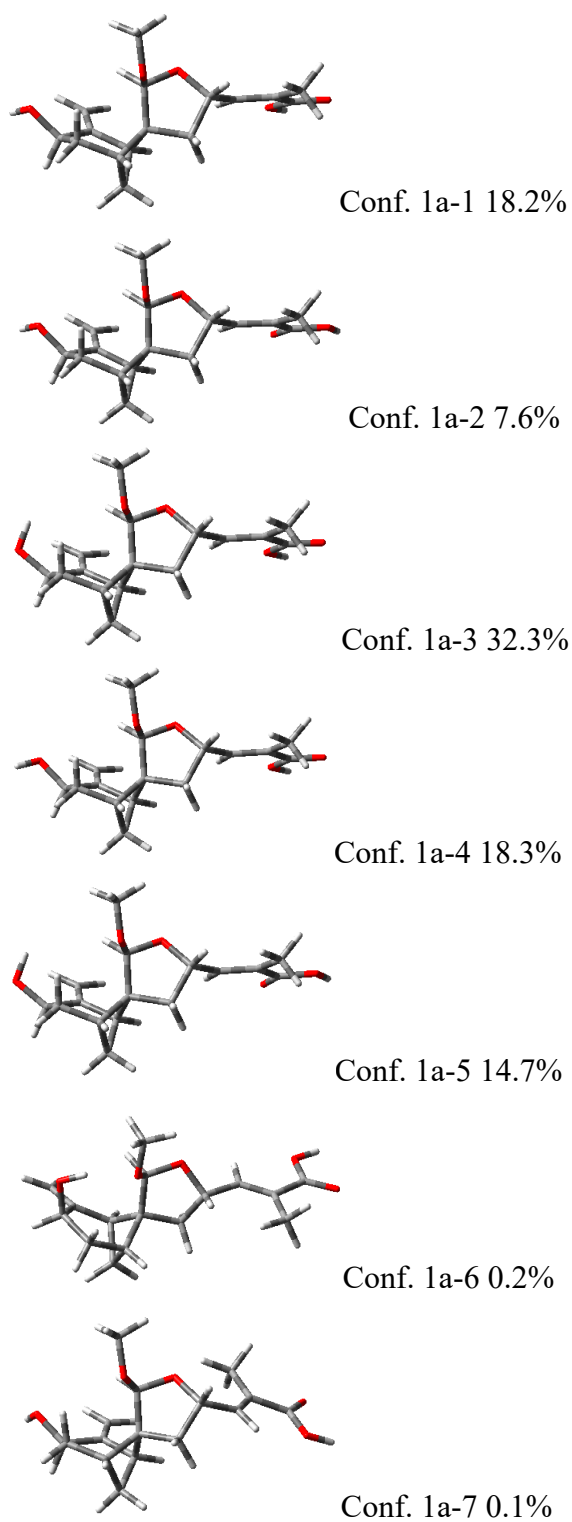

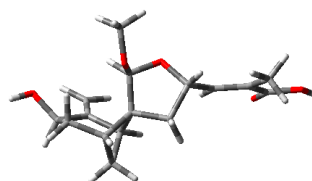

Conf. 1a-8 8.6%

**Table S1** Harmonic frequencies (cm<sup>-1</sup>) of compound **1a**.

| Conformations | Frequencies |         |         |
|---------------|-------------|---------|---------|
|               | 1           | 2       | 3       |
| 1a-1          | 19.0735     | 20.4381 | 46.8963 |
| 1a-2          | 19.4948     | 25.5870 | 48.7451 |
| 1a-3          | 18.9596     | 20.4157 | 50.4323 |
| 1a-4          | 19.3234     | 21.1288 | 51.8031 |
| 1a-5          | 18.8909     | 25.8729 | 51.0282 |
| 1a-6          | 20.7770     | 26.2576 | 48.7462 |
| 1a-7          | 17.3998     | 22.5128 | 55.2759 |
| 1a-8          | 20.1087     | 25.8532 | 52.0789 |

**Table S2** Important thermodynamic parameters (a.u.) and Boltzmann distributions of the optimized compound **1a** at B3LYP/6-31G+(d) level of theory with PCM solvent model for DMSO.

| Conformations | E+ZPE       | G           | %     |
|---------------|-------------|-------------|-------|
| 1a-1          | -998.681195 | -998.732499 | 18.2% |
| 1a-2          | -998.680769 | -998.731668 | 7.6%  |
| 1a-3          | -998.681877 | -998.733039 | 32.3% |
| 1a-4          | -998.681398 | -998.732500 | 18.3% |
| 1a-5          | -998.681464 | -998.732294 | 14.7% |
| 1a-6          | -998.677933 | -998.728364 | 0.2%  |
| 1a-7          | -998.676975 | -998.727925 | 0.1%  |
| 1a-8          | -998.681003 | -998.731790 | 8.6%  |

E+ZPE, G: total energy with zero point energy (ZPE) and Gibbs free energy at B3LYP/6-31G+(d) level of theory with PCM solvent model for DMSO. %: Boltzmann distributions, using the relative Gibbs free energies as weighting factors.

**Table S3** Cartesian coordinates of the low-energy re-optimized conformers of compound **1a** (1*S*,3*R*,5*R*,6*S*,9*S*,14*S*-1) calculated at B3LYP/6-31+G(d) level of theory with PCM solvent model for DMSO.

| Conformer 1a-1 |      | Standard Orientation<br>(Ångstroms) |   |   |
|----------------|------|-------------------------------------|---|---|
| I              | Atom | X                                   | Y | Z |

|    |   |          |          |          |
|----|---|----------|----------|----------|
| 1  | C | -1.18068 | -1.25636 | 1.99685  |
| 2  | C | -2.55339 | -0.64705 | 2.19793  |
| 3  | C | -2.58844 | 0.88969  | 2.04016  |
| 4  | C | -1.23468 | 1.45984  | 1.58704  |
| 5  | C | -0.50818 | 0.69     | 0.41353  |
| 6  | C | -0.09203 | -0.31358 | 1.5682   |
| 7  | C | -0.87564 | -2.54167 | 2.23415  |
| 8  | C | -0.08366 | 0.9451   | 2.49944  |
| 9  | C | 0.6513   | 1.41724  | -0.26873 |
| 10 | C | 0.88581  | 0.58166  | -1.52444 |
| 11 | O | -0.31821 | -0.15124 | -1.7888  |
| 12 | C | -1.29084 | 0.18441  | -0.79233 |
| 13 | O | -2.11544 | 1.25058  | -1.26498 |
| 14 | C | -3.07397 | 0.78761  | -2.20575 |
| 15 | C | 1.98861  | -0.42539 | -1.36078 |
| 16 | C | 3.26016  | -0.31453 | -1.79705 |
| 17 | C | 4.23381  | -1.41746 | -1.58571 |
| 18 | O | 3.76483  | -2.42782 | -0.83462 |
| 19 | C | 3.83604  | 0.87653  | -2.50538 |
| 20 | O | 5.3726   | -1.44172 | -2.01942 |
| 21 | O | -3.44418 | -1.20966 | 1.23664  |
| 22 | H | -2.94147 | -0.91116 | 3.18869  |
| 23 | H | -3.37232 | 1.1948   | 1.33685  |
| 24 | H | -2.84635 | 1.33999  | 3.00714  |
| 25 | H | -1.27234 | 2.54888  | 1.47586  |
| 26 | H | 0.88732  | -0.78892 | 1.45211  |
| 27 | H | 0.13096  | -2.92687 | 2.09608  |
| 28 | H | -1.62345 | -3.24758 | 2.58237  |
| 29 | H | 0.83525  | 1.54148  | 2.46575  |
| 30 | H | -0.32834 | 0.78456  | 3.55481  |
| 31 | H | 1.55081  | 1.53065  | 0.34423  |
| 32 | H | 0.33025  | 2.42466  | -0.56322 |
| 33 | H | 1.06893  | 1.22782  | -2.388   |
| 34 | H | -1.89124 | -0.7031  | -0.58739 |
| 35 | H | -3.66209 | 1.64462  | -2.54495 |
| 36 | H | -2.58257 | 0.3387   | -3.07415 |
| 37 | H | -3.7519  | 0.06603  | -1.73955 |
| 38 | H | 1.68199  | -1.33873 | -0.85302 |
| 39 | H | 4.51717  | -3.05377 | -0.80192 |
| 40 | H | 4.76717  | 1.19585  | -2.02415 |
| 41 | H | 4.05358  | 0.62861  | -3.54946 |

|    |   |          |         |          |
|----|---|----------|---------|----------|
| 42 | H | 3.16967  | 1.74282 | -2.49695 |
| 43 | H | -3.35488 | -2.1755 | 1.29293  |

| Conformer 1a-2 |      | Standard Orientation<br>(Ångstroms) |          |          |
|----------------|------|-------------------------------------|----------|----------|
| I              | Atom | X                                   | Y        | Z        |
| 1              | C    | -1.31627                            | -1.58881 | 1.70311  |
| 2              | C    | -2.63939                            | -0.93698 | 2.0496   |
| 3              | C    | -2.55465                            | 0.59396  | 2.24198  |
| 4              | C    | -1.1576                             | 1.14591  | 1.91477  |
| 5              | C    | -0.483                              | 0.60556  | 0.59138  |
| 6              | C    | -0.15485                            | -0.6604  | 1.4879   |
| 7              | C    | -1.11272                            | -2.91395 | 1.64002  |
| 8              | C    | -0.05723                            | 0.35277  | 2.6775   |
| 9              | C    | 0.735                               | 1.37463  | 0.07794  |
| 10             | C    | 0.91332                             | 0.82493  | -1.33479 |
| 11             | O    | -0.34503                            | 0.27631  | -1.74833 |
| 12             | C    | -1.29432                            | 0.44706  | -0.68912 |
| 13             | O    | -2.03382                            | 1.65126  | -0.8976  |
| 14             | C    | -3.02273                            | 1.4851   | -1.9039  |
| 15             | C    | 1.92281                             | -0.28452 | -1.40865 |
| 16             | C    | 3.1948                              | -0.20138 | -1.84843 |
| 17             | C    | 3.97861                             | -1.46204 | -1.83552 |
| 18             | O    | 5.15449                             | -1.33623 | -2.47213 |
| 19             | C    | 3.8826                              | 1.04464  | -2.31611 |
| 20             | O    | 3.65308                             | -2.51905 | -1.32501 |
| 21             | O    | -3.56405                            | -1.19839 | 0.9955   |
| 22             | H    | -3.05409                            | -1.38686 | 2.95931  |
| 23             | H    | -3.30758                            | 1.10879  | 1.63351  |
| 24             | H    | -2.78408                            | 0.83349  | 3.28808  |
| 25             | H    | -1.11049                            | 2.23171  | 2.05111  |
| 26             | H    | 0.78623                             | -1.17138 | 1.2606   |
| 27             | H    | -0.1374                             | -3.3338  | 1.40792  |
| 28             | H    | -1.91471                            | -3.62157 | 1.82647  |
| 29             | H    | 0.90511                             | 0.86913  | 2.7697   |
| 30             | H    | -0.32197                            | -0.02122 | 3.67223  |
| 31             | H    | 1.63586                             | 1.27766  | 0.69173  |
| 32             | H    | 0.4954                              | 2.44412  | 0.01917  |
| 33             | H    | 1.16248                             | 1.6306   | -2.0315  |
| 34             | H    | -1.96061                            | -0.41681 | -0.68412 |
| 35             | H    | -3.54231                            | 2.4383   | -2.03372 |

|    |   |          |          |          |
|----|---|----------|----------|----------|
| 36 | H | -2.56512 | 1.20681  | -2.85798 |
| 37 | H | -3.75536 | 0.73061  | -1.60123 |
| 38 | H | 1.54485  | -1.25527 | -1.08603 |
| 39 | H | 5.55137  | -2.22858 | -2.39602 |
| 40 | H | 4.07301  | 0.99461  | -3.39312 |
| 41 | H | 3.30157  | 1.94986  | -2.12163 |
| 42 | H | 4.83916  | 1.17384  | -1.79793 |
| 43 | H | -3.54038 | -2.1544  | 0.82333  |

| Conformer 1a-3 |      | Standard Orientation<br>(Ångstroms) |          |          |
|----------------|------|-------------------------------------|----------|----------|
| I              | Atom | X                                   | Y        | Z        |
| 1              | C    | -1.00053                            | 0.97991  | 2.23099  |
| 2              | C    | -0.39119                            | 2.28381  | 2.70961  |
| 3              | C    | 0.93417                             | 2.61054  | 1.9856   |
| 4              | C    | 1.58852                             | 1.34483  | 1.40402  |
| 5              | C    | 0.70361                             | 0.56235  | 0.3492   |
| 6              | C    | -0.02451                            | -0.00033 | 1.64066  |
| 7              | C    | -2.30628                            | 0.67247  | 2.24882  |
| 8              | C    | 1.3815                              | 0.10984  | 2.33015  |
| 9              | C    | 1.39284                             | -0.48971 | -0.51763 |
| 10             | C    | 0.35203                             | -0.76809 | -1.60141 |
| 11             | O    | -0.54223                            | 0.35504  | -1.6438  |
| 12             | C    | -0.09941                            | 1.32865  | -0.69642 |
| 13             | O    | 0.77225                             | 2.26913  | -1.32614 |
| 14             | C    | 0.07503                             | 3.10613  | -2.23882 |
| 15             | C    | -0.4824                             | -1.98344 | -1.3148  |
| 16             | C    | -0.33315                            | -3.21454 | -1.84547 |
| 17             | C    | -1.2653                             | -4.31466 | -1.48383 |
| 18             | O    | -2.15234                            | -3.99017 | -0.52852 |
| 19             | C    | 0.74215                             | -3.62232 | -2.80957 |
| 20             | O    | -1.25525                            | -5.43192 | -1.97058 |
| 21             | O    | -1.30204                            | 3.36009  | 2.5283   |
| 22             | H    | -0.19412                            | 2.19675  | 3.78475  |
| 23             | H    | 0.78141                             | 3.35546  | 1.19584  |
| 24             | H    | 1.6184                              | 3.07851  | 2.70449  |
| 25             | H    | 2.62253                             | 1.52468  | 1.09186  |
| 26             | H    | -0.4075                             | -1.02381 | 1.57812  |
| 27             | H    | -2.68218                            | -0.27364 | 1.87058  |
| 28             | H    | -3.03749                            | 1.36229  | 2.66239  |
| 29             | H    | 2.0588                              | -0.72997 | 2.13586  |



|    |   |          |          |          |
|----|---|----------|----------|----------|
| 30 | H | 1.39712  | 0.29228  | 3.40949  |
| 31 | H | 1.70969  | -1.39185 | 0.01477  |
| 32 | H | 2.28765  | -0.05542 | -0.9815  |
| 33 | H | 0.82913  | -0.83994 | -2.58325 |
| 34 | H | -0.96649 | 1.8526   | -0.2846  |
| 35 | H | 0.79017  | 3.81232  | -2.66932 |
| 36 | H | -0.36169 | 2.51849  | -3.05167 |
| 37 | H | -0.70409 | 3.67436  | -1.7215  |
| 38 | H | -1.30005 | -1.80524 | -0.61791 |
| 39 | H | -2.6768  | -4.80973 | -0.41701 |
| 40 | H | 0.31105  | -3.82467 | -3.79553 |
| 41 | H | 1.51828  | -2.86249 | -2.93126 |
| 42 | H | 1.2472   | -4.52955 | -2.45971 |
| 43 | H | -1.62848 | 3.31093  | 1.61474  |

| Conformer 1a-4 |      | Standard Orientation<br>(Ångstroms) |          |          |
|----------------|------|-------------------------------------|----------|----------|
| I              | Atom | X                                   | Y        | Z        |
| 1              | C    | -2.19149                            | -0.12839 | 1.38068  |
| 2              | C    | -2.419                              | 1.06845  | 2.28135  |
| 3              | C    | -1.12574                            | 1.86597  | 2.56724  |
| 4              | C    | 0.13454                             | 1.0521   | 2.23315  |
| 5              | C    | 0.20952                             | 0.52305  | 0.74451  |
| 6              | C    | -0.77076                            | -0.6014  | 1.28055  |
| 7              | C    | -3.13254                            | -0.72893 | 0.63637  |
| 8              | C    | -0.01995                            | -0.43977 | 2.6465   |
| 9              | C    | 1.5591                              | 0.02121  | 0.2373   |
| 10             | C    | 1.33715                             | -0.0724  | -1.27129 |
| 11             | O    | 0.23409                             | 0.78409  | -1.60313 |
| 12             | C    | -0.23028                            | 1.4205   | -0.40868 |
| 13             | O    | 0.41323                             | 2.68859  | -0.25417 |
| 14             | C    | -0.08039                            | 3.63867  | -1.18893 |
| 15             | C    | 0.97272                             | -1.45692 | -1.72597 |
| 16             | C    | 1.79247                             | -2.36933 | -2.28714 |
| 17             | C    | 1.27265                             | -3.69408 | -2.71648 |
| 18             | O    | -0.0097                             | -3.91469 | -2.38286 |
| 19             | C    | 3.26191                             | -2.18582 | -2.52976 |
| 20             | O    | 1.91789                             | -4.544   | -3.30548 |
| 21             | O    | -3.37615                            | 1.93249  | 1.67946  |
| 22             | H    | -2.83693                            | 0.7083   | 3.22953  |
| 23             | H    | -1.1168                             | 2.81531  | 2.01885  |

|    |   |          |          |          |
|----|---|----------|----------|----------|
| 24 | H | -1.11034 | 2.13685  | 3.63046  |
| 25 | H | 1.04531  | 1.54105  | 2.59443  |
| 26 | H | -0.66317 | -1.59435 | 0.83252  |
| 27 | H | -2.90755 | -1.56324 | -0.02025 |
| 28 | H | -4.16179 | -0.38116 | 0.65972  |
| 29 | H | 0.92189  | -0.99538 | 2.7237   |
| 30 | H | -0.59208 | -0.64266 | 3.55767  |
| 31 | H | 1.89816  | -0.91987 | 0.68135  |
| 32 | H | 2.33162  | 0.77366  | 0.44098  |
| 33 | H | 2.21167  | 0.30107  | -1.81222 |
| 34 | H | -1.31337 | 1.55924  | -0.46961 |
| 35 | H | 0.44245  | 4.58447  | -1.02285 |
| 36 | H | 0.11215  | 3.31297  | -2.21545 |
| 37 | H | -1.15159 | 3.80485  | -1.03888 |
| 38 | H | -0.08024 | -1.70261 | -1.59457 |
| 39 | H | -0.18738 | -4.81012 | -2.73695 |
| 40 | H | 3.46379  | -2.1186  | -3.60383 |
| 41 | H | 3.66506  | -1.28777 | -2.0548  |
| 42 | H | 3.82645  | -3.03255 | -2.1237  |
| 43 | H | -3.54657 | 2.65114  | 2.3107   |

| Conformer 1a-5 |      | Standard Orientation<br>(Ångstroms) |          |          |
|----------------|------|-------------------------------------|----------|----------|
| I              | Atom | X                                   | Y        | Z        |
| 1              | C    | -2.26785                            | -0.02308 | 1.42345  |
| 2              | C    | -2.50518                            | 1.18209  | 2.31312  |
| 3              | C    | -1.22875                            | 2.03269  | 2.49946  |
| 4              | C    | 0.04427                             | 1.21032  | 2.23198  |
| 5              | C    | 0.14518                             | 0.59358  | 0.77679  |
| 6              | C    | -0.8428                             | -0.49979 | 1.36288  |
| 7              | C    | -3.19556                            | -0.63986 | 0.67594  |
| 8              | C    | -0.10297                            | -0.25912 | 2.72627  |
| 9              | C    | 1.50312                             | 0.06337  | 0.32054  |
| 10             | C    | 1.30643                             | -0.11709 | -1.18412 |
| 11             | O    | 0.20092                             | 0.70916  | -1.58017 |
| 12             | C    | -0.27363                            | 1.41959  | -0.43483 |
| 13             | O    | 0.36541                             | 2.69442  | -0.34717 |
| 14             | C    | -0.06603                            | 3.57269  | -1.37778 |
| 15             | C    | 0.95829                             | -1.52678 | -1.56512 |
| 16             | C    | 1.77947                             | -2.45385 | -2.09868 |
| 17             | C    | 1.17014                             | -3.77256 | -2.40571 |

|    |   |          |          |          |
|----|---|----------|----------|----------|
| 18 | O | 2.00383  | -4.57108 | -3.09184 |
| 19 | C | 3.24031  | -2.27622 | -2.37965 |
| 20 | O | 0.05262  | -4.14864 | -2.10008 |
| 21 | O | -3.53991 | 2.0014   | 1.78462  |
| 22 | H | -2.83739 | 0.82447  | 3.29501  |
| 23 | H | -1.24769 | 2.92163  | 1.85806  |
| 24 | H | -1.20925 | 2.41188  | 3.52894  |
| 25 | H | 0.94613  | 1.72851  | 2.57418  |
| 26 | H | -0.73195 | -1.51677 | 0.97366  |
| 27 | H | -2.95607 | -1.48978 | 0.04311  |
| 28 | H | -4.23329 | -0.31697 | 0.6927   |
| 29 | H | 0.84194  | -0.8028  | 2.84177  |
| 30 | H | -0.67924 | -0.41745 | 3.64353  |
| 31 | H | 1.8347   | -0.8509  | 0.82243  |
| 32 | H | 2.27278  | 0.82635  | 0.4936   |
| 33 | H | 2.18677  | 0.23373  | -1.73048 |
| 34 | H | -1.35539 | 1.55716  | -0.51749 |
| 35 | H | 0.44258  | 4.53137  | -1.24469 |
| 36 | H | 0.19632  | 3.17663  | -2.36322 |
| 37 | H | -1.14531 | 3.74135  | -1.31261 |
| 38 | H | -0.08734 | -1.78965 | -1.40125 |
| 39 | H | 1.47729  | -5.38562 | -3.23007 |
| 40 | H | 3.42364  | -2.26946 | -3.45905 |
| 41 | H | 3.64318  | -1.34753 | -1.96734 |
| 42 | H | 3.82016  | -3.09075 | -1.93188 |
| 43 | H | -3.34989 | 2.13334  | 0.84119  |

| Conformer 1a-6 |      | Standard Orientation<br>(Ångstroms) |          |          |
|----------------|------|-------------------------------------|----------|----------|
| I              | Atom | X                                   | Y        | Z        |
| 1              | C    | -2.95208                            | -0.28602 | 1.57667  |
| 2              | C    | -2.72501                            | 1.03133  | 2.28879  |
| 3              | C    | -1.25562                            | 1.28137  | 2.6946   |
| 4              | C    | -0.31581                            | 0.21328  | 2.1133   |
| 5              | C    | -0.55789                            | -0.30862 | 0.62373  |
| 6              | C    | -1.73482                            | -1.12141 | 1.30394  |
| 7              | C    | -4.1565                             | -0.72684 | 1.18349  |
| 8              | C    | -0.8154                             | -1.19599 | 2.56257  |
| 9              | C    | 0.60105                             | -1.15378 | 0.07396  |
| 10             | C    | 1.18468                             | -0.23375 | -0.98156 |
| 11             | O    | 0.02307                             | 0.31152  | -1.61145 |

|    |   |          |          |          |
|----|---|----------|----------|----------|
| 12 | C | -0.91496 | 0.60444  | -0.56319 |
| 13 | O | -0.82127 | 1.9742   | -0.17351 |
| 14 | C | -1.06811 | 2.85294  | -1.2693  |
| 15 | C | 1.9803   | -0.96269 | -2.01689 |
| 16 | C | 3.31764  | -0.93116 | -2.18978 |
| 17 | C | 3.95818  | -1.69345 | -3.29423 |
| 18 | O | 3.10914  | -2.46273 | -3.99496 |
| 19 | C | 4.29091  | -0.17284 | -1.33533 |
| 20 | O | 5.14533  | -1.666   | -3.56917 |
| 21 | O | -3.16946 | 2.07894  | 1.4305   |
| 22 | H | -3.35196 | 1.07457  | 3.18683  |
| 23 | H | -0.92045 | 2.28194  | 2.39914  |
| 24 | H | -1.17919 | 1.24964  | 3.78934  |
| 25 | H | 0.72906  | 0.42427  | 2.36658  |
| 26 | H | -1.95516 | -2.09295 | 0.84837  |
| 27 | H | -4.29169 | -1.67408 | 0.67195  |
| 28 | H | -5.04637 | -0.12834 | 1.36199  |
| 29 | H | -0.06219 | -1.99202 | 2.53356  |
| 30 | H | -1.31348 | -1.25859 | 3.53602  |
| 31 | H | 0.20474  | -2.07073 | -0.38101 |
| 32 | H | 1.35086  | -1.43565 | 0.81977  |
| 33 | H | 1.73441  | 0.59823  | -0.52923 |
| 34 | H | -1.91894 | 0.3972   | -0.94963 |
| 35 | H | -1.08145 | 3.87662  | -0.8853  |
| 36 | H | -0.27149 | 2.77746  | -2.015   |
| 37 | H | -2.03978 | 2.63975  | -1.72524 |
| 38 | H | 1.37116  | -1.5563  | -2.69812 |
| 39 | H | 3.68209  | -2.88206 | -4.66921 |
| 40 | H | 4.72754  | 0.65606  | -1.90213 |
| 41 | H | 3.83736  | 0.24068  | -0.43133 |
| 42 | H | 5.10227  | -0.8299  | -1.00281 |
| 43 | H | -2.4307  | 2.27145  | 0.8233   |

| Conformer 1a-7 |      | Standard Orientation<br>(Ångstroms) |          |         |
|----------------|------|-------------------------------------|----------|---------|
| I              | Atom | X                                   | Y        | Z       |
| 1              | C    | -1.71226                            | -0.07967 | 1.38357 |
| 2              | C    | -2.2423                             | 1.33115  | 1.53836 |
| 3              | C    | -1.15172                            | 2.38298  | 1.84269 |
| 4              | C    | 0.26406                             | 1.78531  | 1.79526 |
| 5              | C    | 0.58106                             | 0.83277  | 0.57504 |

|    |   |          |          |          |
|----|---|----------|----------|----------|
| 6  | C | -0.21885 | -0.23614 | 1.43113  |
| 7  | C | -2.48033 | -1.17442 | 1.26929  |
| 8  | C | 0.35454  | 0.50985  | 2.68227  |
| 9  | C | 2.05092  | 0.49983  | 0.31921  |
| 10 | C | 1.99664  | -0.17941 | -1.04945 |
| 11 | O | 0.85604  | 0.34506  | -1.72799 |
| 12 | C | 0.1163   | 1.18514  | -0.8329  |
| 13 | O | 0.4474   | 2.55222  | -1.07988 |
| 14 | C | -0.1959  | 3.03968  | -2.24878 |
| 15 | C | 1.94379  | -1.68475 | -0.93222 |
| 16 | C | 1.05848  | -2.57368 | -1.43398 |
| 17 | C | 1.20181  | -4.02284 | -1.12849 |
| 18 | O | 2.34038  | -4.33722 | -0.48628 |
| 19 | C | -0.10954 | -2.22992 | -2.31187 |
| 20 | O | 0.39504  | -4.89194 | -1.40934 |
| 21 | O | -2.89053 | 1.70541  | 0.32423  |
| 22 | H | -2.99921 | 1.36527  | 2.33076  |
| 23 | H | -1.21918 | 3.23048  | 1.15038  |
| 24 | H | -1.3211  | 2.78912  | 2.84804  |
| 25 | H | 1.029    | 2.5401   | 2.00704  |
| 26 | H | 0.12161  | -1.27216 | 1.33725  |
| 27 | H | -2.05189 | -2.16922 | 1.18074  |
| 28 | H | -3.56414 | -1.11028 | 1.2681   |
| 29 | H | 1.37077  | 0.21823  | 2.97102  |
| 30 | H | -0.25692 | 0.49931  | 3.59082  |
| 31 | H | 2.52662  | -0.11362 | 1.09022  |
| 32 | H | 2.62815  | 1.42995  | 0.23871  |
| 33 | H | 2.89112  | 0.07551  | -1.62909 |
| 34 | H | -0.94749 | 1.0107   | -1.00163 |
| 35 | H | 0.10724  | 4.07953  | -2.39788 |
| 36 | H | 0.10326  | 2.46168  | -3.12829 |
| 37 | H | -1.28327 | 3.01052  | -2.12897 |
| 38 | H | 2.77091  | -2.06937 | -0.33453 |
| 39 | H | 2.27676  | -5.30863 | -0.37858 |
| 40 | H | -0.91254 | -1.77752 | -1.72169 |
| 41 | H | 0.18412  | -1.54633 | -3.11448 |
| 42 | H | -0.52592 | -3.10957 | -2.81355 |
| 43 | H | -3.53293 | 1.0069   | 0.11574  |

|                       |                                     |
|-----------------------|-------------------------------------|
| <b>Conformer 1a-8</b> | Standard Orientation<br>(Ångstroms) |
|-----------------------|-------------------------------------|

| I  | Atom | X        | Y        | Z        |
|----|------|----------|----------|----------|
| 1  | C    | -2.23393 | -0.45057 | 1.33805  |
| 2  | C    | -3.16276 | 0.74415  | 1.40681  |
| 3  | C    | -2.44569 | 2.08646  | 1.1341   |
| 4  | C    | -0.91957 | 1.95712  | 1.26219  |
| 5  | C    | -0.26436 | 0.85617  | 0.33459  |
| 6  | C    | -0.7706  | -0.14044 | 1.45858  |
| 7  | C    | -2.61514 | -1.71738 | 1.11418  |
| 8  | C    | -0.52021 | 1.04233  | 2.45537  |
| 9  | C    | 1.24909  | 0.90301  | 0.13984  |
| 10 | C    | 1.46592  | -0.04263 | -1.04033 |
| 11 | O    | 0.2216   | -0.15046 | -1.74687 |
| 12 | C    | -0.74775 | 0.68155  | -1.10227 |
| 13 | O    | -0.76792 | 1.97013  | -1.72326 |
| 14 | C    | -1.37951 | 1.91858  | -3.00522 |
| 15 | C    | 1.85314  | -1.43    | -0.61633 |
| 16 | C    | 3.08583  | -1.97608 | -0.64186 |
| 17 | C    | 3.19074  | -3.38473 | -0.18521 |
| 18 | O    | 4.40152  | -3.91076 | -0.43287 |
| 19 | C    | 4.3456   | -1.28194 | -1.06078 |
| 20 | O    | 2.3218   | -4.04333 | 0.35765  |
| 21 | O    | -4.2124  | 0.57659  | 0.46053  |
| 22 | H    | -3.61056 | 0.77204  | 2.40788  |
| 23 | H    | -2.70796 | 2.48159  | 0.14559  |
| 24 | H    | -2.80766 | 2.82887  | 1.8565   |
| 25 | H    | -0.42294 | 2.93282  | 1.24016  |
| 26 | H    | -0.14418 | -1.01768 | 1.6489   |
| 27 | H    | -1.90266 | -2.53316 | 1.04091  |
| 28 | H    | -3.66511 | -1.96501 | 0.98416  |
| 29 | H    | 0.51782  | 1.151    | 2.79065  |
| 30 | H    | -1.15548 | 1.0875   | 3.34595  |
| 31 | H    | 1.83655  | 0.63102  | 1.0223   |
| 32 | H    | 1.55118  | 1.91695  | -0.15192 |
| 33 | H    | 2.1992   | 0.37579  | -1.73589 |
| 34 | H    | -1.73429 | 0.21617  | -1.1809  |
| 35 | H    | -1.36846 | 2.92621  | -3.42953 |
| 36 | H    | -0.82551 | 1.25506  | -3.67585 |
| 37 | H    | -2.42005 | 1.59006  | -2.92178 |
| 38 | H    | 1.01712  | -2.04412 | -0.27941 |
| 39 | H    | 4.32326  | -4.82753 | -0.09653 |
| 40 | H    | 4.71712  | -1.69978 | -2.00211 |

|    |   |          |          |          |
|----|---|----------|----------|----------|
| 41 | H | 4.21182  | -0.20643 | -1.20277 |
| 42 | H | 5.12175  | -1.3986  | -0.29644 |
| 43 | H | -4.82634 | 1.31946  | 0.58324  |

**Figure S44** DFT-optimized structures for low-energy conformers of **1b** (1*S*,3*S*,5*R*,6*S*,9*S*,14*S*-**1**) at B3LYP/6-31+G(d) level in DMSO (PCM).

Conformer populations were calculated using the Gibbs free energy and Boltzmann population at 298 K estimated thereof.

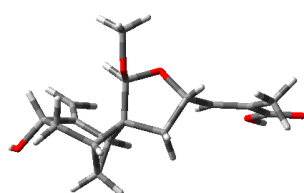

Conf. 1b-1 55.7%

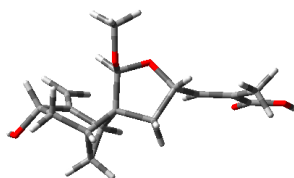

Conf. 1b-2 31.6%

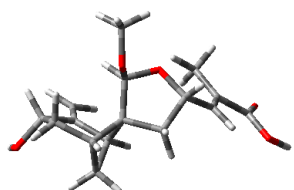

Conf. 1b-3 1.55%

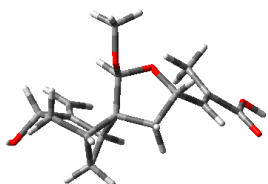

Conf. 1b-4 0.7%

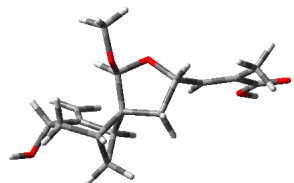

Conf. 1b-5 10.4%

**Table S4** Harmonic frequencies (cm<sup>-1</sup>) of compound **1b**.

| Conformations | Frequencies |         |         |
|---------------|-------------|---------|---------|
|               | 1           | 2       | 3       |
| 1b-1          | 21.7274     | 26.1484 | 51.5239 |
| 1b-2          | 22.0726     | 26.3038 | 51.6332 |
| 1b-3          | 11.3854     | 25.0126 | 56.9492 |

|      |         |         |         |
|------|---------|---------|---------|
| 1b-4 | 12.5742 | 26.1711 | 57.0078 |
| 1b-5 | 20.2057 | 25.3751 | 51.0603 |

**Table S5** Important thermodynamic parameters (a.u.) and Boltzmann distributions of the optimized compound **1b** at B3LYP/6-31G+(d) level of theory with PCM solvent model for DMSO.

| Conformations | E+ZPE       | G           | %     |
|---------------|-------------|-------------|-------|
| 1b-1          | -998.681927 | -998.732670 | 55.7% |
| 1b-2          | -998.681532 | -998.732136 | 31.6% |
| 1b-3          | -998.677949 | -998.729289 | 1.5%  |
| 1b-4          | -998.677605 | -998.728595 | 0.7%  |
| 1b-5          | -998.680205 | -998.731088 | 10.4% |

E+ZPE, G: total energy with zero point energy (ZPE) and Gibbs free energy at B3LYP/6-31G+(d) level of theory with PCM solvent model for DMSO. %: Boltzmann distributions, using the relative Gibbs free energies as weighting factors

**Table S6** Cartesian coordinates of the low-energy re-optimized conformers of compound **1b** (1*S*,3*S*,5*R*,6*S*,9*S*,14*S*-**1**) calculated at B3LYP/6-31+G(d) level of theory with PCM solvent model for DMSO.

| Conformer 1b-1 |      | Standard Orientation<br>(Ångstroms) |          |          |
|----------------|------|-------------------------------------|----------|----------|
| I              | Atom | X                                   | Y        | Z        |
| 1              | C    | 2.54326                             | -0.28775 | -0.45061 |
| 2              | C    | 3.47355                             | 0.39018  | 0.5294   |
| 3              | C    | 2.74563                             | 1.42362  | 1.41713  |
| 4              | C    | 1.41948                             | 1.88673  | 0.77813  |
| 5              | C    | 0.37884                             | 0.72555  | 0.49251  |
| 6              | C    | 1.28748                             | 0.46869  | -0.78289 |
| 7              | C    | 2.72638                             | -1.51813 | -0.95159 |
| 8              | C    | 1.52448                             | 2.0202   | -0.77012 |
| 9              | C    | -1.06647                            | 1.11706  | 0.19013  |
| 10             | C    | -1.80834                            | -0.21403 | 0.30836  |
| 11             | O    | -0.98943                            | -1.10142 | 1.08646  |
| 12             | C    | 0.17552                             | -0.39095 | 1.51157  |
| 13             | O    | -0.05196                            | 0.20649  | 2.78973  |
| 14             | C    | -0.13403                            | -0.76891 | 3.81987  |
| 15             | C    | -2.0365                             | -0.87835 | -1.01915 |
| 16             | C    | -3.17689                            | -0.8834  | -1.73951 |
| 17             | C    | -3.25631                            | -1.61807 | -3.0293  |
| 18             | O    | -2.09009                            | -2.15101 | -3.43042 |



|    |   |          |          |          |
|----|---|----------|----------|----------|
| 19 | C | -4.44626 | -0.1762  | -1.3645  |
| 20 | O | -4.26212 | -1.74137 | -3.70648 |
| 21 | O | 4.48256  | 1.06743  | -0.21679 |
| 22 | H | 3.98435  | -0.34038 | 1.16644  |
| 23 | H | 3.38812  | 2.29541  | 1.58981  |
| 24 | H | 2.53364  | 0.9836   | 2.39812  |
| 25 | H | 1.00239  | 2.75855  | 1.29305  |
| 26 | H | 0.77729  | 0.10625  | -1.68086 |
| 27 | H | 2.00641  | -1.97572 | -1.62471 |
| 28 | H | 3.60408  | -2.10577 | -0.69836 |
| 29 | H | 0.72753  | 2.61271  | -1.23495 |
| 30 | H | 2.47026  | 2.39039  | -1.17627 |
| 31 | H | -1.22028 | 1.60888  | -0.77533 |
| 32 | H | -1.43185 | 1.80279  | 0.96518  |
| 33 | H | -2.7493  | -0.0824  | 0.85063  |
| 34 | H | 1.01919  | -1.08403 | 1.5765   |
| 35 | H | -0.97919 | -1.44308 | 3.65258  |
| 36 | H | 0.79776  | -1.339   | 3.88522  |
| 37 | H | -0.28943 | -0.25021 | 4.76975  |
| 38 | H | -1.17242 | -1.42388 | -1.39535 |
| 39 | H | -2.31975 | -2.58808 | -4.27618 |
| 40 | H | -4.805   | 0.43656  | -2.19899 |
| 41 | H | -5.22445 | -0.90301 | -1.10939 |
| 42 | H | -4.32464 | 0.49906  | -0.51375 |
| 43 | H | 4.76649  | 0.46501  | -0.92504 |

| Conformer 1b-2 |      | Standard Orientation<br>(Ångstroms) |          |          |
|----------------|------|-------------------------------------|----------|----------|
| I              | Atom | X                                   | Y        | Z        |
| 1              | C    | 2.48443                             | 0.72767  | -0.48921 |
| 2              | C    | 3.24833                             | 1.3309   | 0.66733  |
| 3              | C    | 2.32509                             | 1.74018  | 1.83619  |
| 4              | C    | 0.86463                             | 1.91889  | 1.37037  |
| 5              | C    | 0.21513                             | 0.63144  | 0.71149  |
| 6              | C    | 1.02956                             | 1.0963   | -0.56888 |
| 7              | C    | 2.99175                             | -0.1535  | -1.36357 |
| 8              | C    | 0.77107                             | 2.55425  | -0.04841 |
| 9              | C    | -1.30223                            | 0.60214  | 0.53781  |
| 10             | C    | -1.575                              | -0.86497 | 0.20797  |
| 11             | O    | -0.4543                             | -1.63176 | 0.67517  |
| 12             | C    | 0.4706                              | -0.74742 | 1.31207  |

|    |   |          |          |          |
|----|---|----------|----------|----------|
| 13 | O | 0.19922  | -0.68134 | 2.7138   |
| 14 | C | 0.53209  | -1.89591 | 3.37208  |
| 15 | C | -1.69695 | -1.12255 | -1.26606 |
| 16 | C | -2.83247 | -1.29542 | -1.97253 |
| 17 | C | -2.66927 | -1.56202 | -3.42402 |
| 18 | O | -3.83085 | -1.88421 | -4.01609 |
| 19 | C | -4.22593 | -1.21655 | -1.42793 |
| 20 | O | -1.63362 | -1.51188 | -4.06337 |
| 21 | O | 3.91938  | 2.49659  | 0.1933   |
| 22 | H | 4.02037  | 0.64664  | 1.03635  |
| 23 | H | 2.67742  | 2.6747   | 2.28916  |
| 24 | H | 2.35818  | 0.97369  | 2.61865  |
| 25 | H | 0.24899  | 2.40044  | 2.13735  |
| 26 | H | 0.5729   | 0.88694  | -1.54128 |
| 27 | H | 2.38797  | -0.58584 | -2.15731 |
| 28 | H | 4.02921  | -0.47028 | -1.30878 |
| 29 | H | -0.21231 | 2.96744  | -0.30242 |
| 30 | H | 1.5099   | 3.3199   | -0.30221 |
| 31 | H | -1.69523 | 1.29078  | -0.21649 |
| 32 | H | -1.78627 | 0.85309  | 1.49026  |
| 33 | H | -2.45909 | -1.22076 | 0.74508  |
| 34 | H | 1.48935  | -1.11245 | 1.15297  |
| 35 | H | -0.07147 | -2.72477 | 2.99064  |
| 36 | H | 1.59721  | -2.11789 | 3.25474  |
| 37 | H | 0.31922  | -1.7762  | 4.43784  |
| 38 | H | -0.74227 | -1.19479 | -1.78806 |
| 39 | H | -3.57604 | -2.03821 | -4.9494  |
| 40 | H | -4.7007  | -2.20291 | -1.44904 |
| 41 | H | -4.26039 | -0.85228 | -0.39792 |
| 42 | H | -4.83255 | -0.524   | -2.0217  |
| 43 | H | 4.29493  | 2.27593  | -0.67596 |

| Conformer 1b-3 |      | Standard Orientation<br>(Ångstroms) |         |          |
|----------------|------|-------------------------------------|---------|----------|
| I              | Atom | X                                   | Y       | Z        |
| 1              | C    | 1.62992                             | -0.0037 | -1.43887 |
| 2              | C    | 3.01196                             | 0.32763 | -0.92357 |
| 3              | C    | 2.97556                             | 1.17759 | 0.36561  |
| 4              | C    | 1.62111                             | 1.8979  | 0.53313  |
| 5              | C    | 0.36051                             | 0.9387  | 0.58786  |
| 6              | C    | 0.53143                             | 0.91906 | -0.99031 |

|    |   |          |          |          |
|----|---|----------|----------|----------|
| 7  | C | 1.32829  | -1.08169 | -2.17735 |
| 8  | C | 1.0445   | 2.39318  | -0.82636 |
| 9  | C | -0.96021 | 1.51363  | 1.09425  |
| 10 | C | -1.82215 | 0.25733  | 1.24683  |
| 11 | O | -0.92618 | -0.83189 | 1.48324  |
| 12 | C | 0.42208  | -0.36904 | 1.37022  |
| 13 | O | 0.94931  | -0.08781 | 2.6684   |
| 14 | C | 1.15458  | -1.27433 | 3.42271  |
| 15 | C | -2.68695 | 0.00826  | 0.03354  |
| 16 | C | -2.90051 | -1.12908 | -0.66367 |
| 17 | C | -3.7555  | -1.11183 | -1.88117 |
| 18 | O | -4.37374 | 0.06144  | -2.10019 |
| 19 | C | -2.35293 | -2.48117 | -0.30931 |
| 20 | O | -3.91627 | -2.04565 | -2.64752 |
| 21 | O | 3.69232  | 1.06998  | -1.93352 |
| 22 | H | 3.59948  | -0.57964 | -0.74427 |
| 23 | H | 3.78163  | 1.92108  | 0.35321  |
| 24 | H | 3.14792  | 0.53487  | 1.23617  |
| 25 | H | 1.6565   | 2.65242  | 1.32598  |
| 26 | H | -0.38566 | 0.83364  | -1.58139 |
| 27 | H | 0.31073  | -1.29255 | -2.49523 |
| 28 | H | 2.09435  | -1.78735 | -2.48555 |
| 29 | H | 0.2555   | 3.14987  | -0.74259 |
| 30 | H | 1.75973  | 2.76439  | -1.56612 |
| 31 | H | -1.41017 | 2.27518  | 0.45056  |
| 32 | H | -0.80688 | 1.96956  | 2.08083  |
| 33 | H | -2.48418 | 0.36271  | 2.1137   |
| 34 | H | 1.02967  | -1.13984 | 0.88741  |
| 35 | H | 0.20874  | -1.79667 | 3.59407  |
| 36 | H | 1.86496  | -1.93455 | 2.91579  |
| 37 | H | 1.57441  | -0.99416 | 4.39262  |
| 38 | H | -3.19375 | 0.91406  | -0.30058 |
| 39 | H | -4.88695 | -0.10296 | -2.91812 |
| 40 | H | -2.3496  | -2.64573 | 0.77236  |
| 41 | H | -2.9639  | -3.29052 | -0.72326 |
| 42 | H | -1.33623 | -2.59608 | -0.69729 |
| 43 | H | 3.50657  | 0.63374  | -2.78228 |

| Conformer 1b-4 |      | Standard Orientation<br>(Ångstroms) |   |   |
|----------------|------|-------------------------------------|---|---|
| I              | Atom | X                                   | Y | Z |

|    |   |          |          |          |
|----|---|----------|----------|----------|
| 1  | C | 1.7022   | 0.08531  | -1.31632 |
| 2  | C | 3.03942  | 0.45281  | -0.71455 |
| 3  | C | 2.89815  | 1.29888  | 0.57008  |
| 4  | C | 1.51705  | 1.98283  | 0.65099  |
| 5  | C | 0.2812   | 0.99069  | 0.624    |
| 6  | C | 0.55379  | 0.97908  | -0.93989 |
| 7  | C | 1.47524  | -1.00167 | -2.06826 |
| 8  | C | 1.0163   | 2.46569  | -0.7425  |
| 9  | C | -1.08497 | 1.52786  | 1.04396  |
| 10 | C | -1.92043 | 0.24791  | 1.13686  |
| 11 | O | -1.01193 | -0.81686 | 1.43136  |
| 12 | C | 0.32743  | -0.31683 | 1.40771  |
| 13 | O | 0.76077  | -0.02466 | 2.73784  |
| 14 | C | 0.94624  | -1.20673 | 3.50405  |
| 15 | C | -2.69021 | -0.02371 | -0.13305 |
| 16 | C | -2.83525 | -1.16749 | -0.83565 |
| 17 | C | -3.6197  | -1.05979 | -2.09096 |
| 18 | O | -3.39133 | -2.08779 | -2.9246  |
| 19 | C | -2.32314 | -2.52148 | -0.45013 |
| 20 | O | -4.37512 | -0.15654 | -2.40297 |
| 21 | O | 3.76279  | 1.21467  | -1.67898 |
| 22 | H | 3.63841  | -0.43878 | -0.49837 |
| 23 | H | 3.68337  | 2.06344  | 0.60951  |
| 24 | H | 3.03141  | 0.65911  | 1.44964  |
| 25 | H | 1.48149  | 2.73621  | 1.44489  |
| 26 | H | -0.32044 | 0.87131  | -1.58934 |
| 27 | H | 0.4849   | -1.23935 | -2.44733 |
| 28 | H | 2.27707  | -1.68786 | -2.325   |
| 29 | H | 0.20383  | 3.20117  | -0.70923 |
| 30 | H | 1.76753  | 2.85719  | -1.43455 |
| 31 | H | -1.51238 | 2.2795   | 0.3738   |
| 32 | H | -1.009   | 1.98383  | 2.03946  |
| 33 | H | -2.64292 | 0.33241  | 1.95637  |
| 34 | H | 0.98643  | -1.06951 | 0.96549  |
| 35 | H | 0.00472  | -1.75297 | 3.61341  |
| 36 | H | 1.70461  | -1.84811 | 3.04469  |
| 37 | H | 1.29468  | -0.91756 | 4.49927  |
| 38 | H | -3.1879  | 0.86905  | -0.51797 |
| 39 | H | -3.95575 | -1.88303 | -3.69862 |
| 40 | H | -2.28712 | -2.65564 | 0.63438  |
| 41 | H | -2.98257 | -3.31706 | -0.81417 |

|    |   |          |         |          |
|----|---|----------|---------|----------|
| 42 | H | -1.32447 | -2.6865 | -0.86565 |
| 43 | H | 3.63559  | 0.78095 | -2.53967 |

| Conformer 1b-5 |      | Standard Orientation<br>(Ångstroms) |          |          |
|----------------|------|-------------------------------------|----------|----------|
| I              | Atom | X                                   | Y        | Z        |
| 1              | C    | 1.97589                             | -0.42074 | -1.62305 |
| 2              | C    | 3.34627                             | -0.1341  | -1.05833 |
| 3              | C    | 3.28775                             | 0.70223  | 0.2406   |
| 4              | C    | 1.94385                             | 1.44734  | 0.37737  |
| 5              | C    | 0.66209                             | 0.51448  | 0.37583  |
| 6              | C    | 0.88343                             | 0.51739  | -1.19508 |
| 7              | C    | 1.67666                             | -1.47295 | -2.39871 |
| 8              | C    | 1.42214                             | 1.97714  | -0.9908  |
| 9              | C    | -0.65849                            | 1.11864  | 0.8491   |
| 10             | C    | -1.54627                            | -0.11131 | 1.03105  |
| 11             | O    | -0.68539                            | -1.25106 | 1.17881  |
| 12             | C    | 0.67301                             | -0.80827 | 1.13561  |
| 13             | O    | 1.15117                             | -0.55803 | 2.45957  |
| 14             | C    | 1.29012                             | -1.7604  | 3.20445  |
| 15             | C    | -2.43062                            | -0.37843 | -0.15313 |
| 16             | C    | -3.73969                            | -0.0764  | -0.27408 |
| 17             | C    | -4.49089                            | -0.43605 | -1.50551 |
| 18             | O    | -3.73078                            | -0.9707  | -2.47541 |
| 19             | C    | -4.56694                            | 0.63695  | 0.75488  |
| 20             | O    | -5.68641                            | -0.26772 | -1.67272 |
| 21             | O    | 4.06344                             | 0.59034  | -2.05469 |
| 22             | H    | 3.8975                              | -1.06331 | -0.87386 |
| 23             | H    | 4.10769                             | 1.42988  | 0.26424  |
| 24             | H    | 3.42041                             | 0.04486  | 1.10726  |
| 25             | H    | 1.9699                              | 2.18815  | 1.18344  |
| 26             | H    | -0.01719                            | 0.46093  | -1.81453 |
| 27             | H    | 0.66898                             | -1.65225 | -2.76114 |
| 28             | H    | 2.44591                             | -2.17365 | -2.70935 |
| 29             | H    | 0.64717                             | 2.74946  | -0.91913 |
| 30             | H    | 2.16902                             | 2.34407  | -1.70086 |
| 31             | H    | -1.09322                            | 1.8649   | 0.17701  |
| 32             | H    | -0.51253                            | 1.604    | 1.82253  |
| 33             | H    | -2.13368                            | -0.02802 | 1.95016  |
| 34             | H    | 1.28998                             | -1.57901 | 0.66481  |
| 35             | H    | 0.32266                             | -2.255   | 3.33154  |

|    |   |          |          |          |
|----|---|----------|----------|----------|
| 36 | H | 1.99958  | -2.43583 | 2.71663  |
| 37 | H | 1.67951  | -1.50582 | 4.19393  |
| 38 | H | -1.9301  | -0.89329 | -0.972   |
| 39 | H | -4.36914 | -1.14348 | -3.19754 |
| 40 | H | -3.97054 | 1.04943  | 1.5726   |
| 41 | H | -5.09896 | 1.48084  | 0.30172  |
| 42 | H | -5.3057  | -0.04564 | 1.18757  |
| 43 | H | 4.97243  | 0.70045  | -1.73083 |

**Table S7** Calculated  $^1\text{H}$  and  $^{13}\text{C}$  NMR chemical shifts of compound **1a**.

| Position | Type | Shielding tensors (calculated) <sup>a</sup> |             |             |             |             |             |             |             |                         | Chemical shifts (ppm) (calculated) | Chemical shifts (ppm) (experimental) <sup>b</sup> |
|----------|------|---------------------------------------------|-------------|-------------|-------------|-------------|-------------|-------------|-------------|-------------------------|------------------------------------|---------------------------------------------------|
|          |      | <b>1a-1</b>                                 | <b>1a-2</b> | <b>1a-3</b> | <b>1a-4</b> | <b>1a-5</b> | <b>1a-6</b> | <b>1a-7</b> | <b>1a-8</b> | <b>1a</b><br>(averaged) | <b>1a</b><br>(unscaled)            | Brasilterpene A<br>(1)                            |
| 1        | C    | 125.4239                                    | 125.5415    | 125.7861    | 125.5595    | 125.8964    | 123.1487    | 126.0792    | 125.6667    | 125.66054               | 58.30626                           | 51.1                                              |
| 2        | C    | 15.2609                                     | 15.2814     | 15.1319     | 18.3104     | 15.1342     | 12.082      | 14.6294     | 18.2888     | 16.011035               | 167.9558                           | 153.8                                             |
| 3        | C    | 109.7372                                    | 109.7596    | 108.7418    | 110.5339    | 108.7659    | 112.1642    | 110.4392    | 110.604     | 109.50122               | 74.46558                           | 64.8                                              |
| 4        | C    | 145.6046                                    | 145.6318    | 142.5551    | 142.7832    | 142.5691    | 140.4954    | 146.2924    | 142.8086    | 143.40976               | 40.55704                           | 35.9                                              |
| 5        | C    | 137.157                                     | 137.1378    | 136.7552    | 137.0139    | 136.749     | 134.0384    | 137.4473    | 136.9886    | 136.91856               | 47.04824                           | 38.7                                              |
| 6        | C    | 119.4322                                    | 119.3673    | 119.4518    | 119.4431    | 119.3804    | 122.1254    | 121.4862    | 119.4026    | 119.43455               | 64.53225                           | 54.2                                              |
| 7        | C    | 154.4205                                    | 154.4274    | 154.5381    | 154.2583    | 154.537     | 145.2376    | 154.4048    | 154.2429    | 154.41029               | 29.55651                           | 29.1                                              |
| 8        | C    | 138.3557                                    | 138.5902    | 138.2513    | 138.3947    | 138.4876    | 131.9963    | 138.9393    | 138.6483    | 138.37767               | 45.58913                           | 40.8                                              |
| 9        | C    | 103.8199                                    | 104.1436    | 103.8039    | 103.796     | 104.1304    | 103.6212    | 99.5351     | 104.1424    | 103.90154               | 80.06526                           | 73.0                                              |
| 10       | C    | 26.3189                                     | 25.7979     | 26.4523     | 26.3278     | 25.9359     | 28.7055     | 27.2426     | 25.8343     | 26.233146               | 157.7337                           | 142.1                                             |
| 11       | C    | 48.8347                                     | 48.6309     | 48.7763     | 48.8337     | 48.5797     | 46.4075     | 52.4568     | 48.6089     | 48.743062               | 135.2237                           | 128.3                                             |
| 12       | C    | 5.5818                                      | 5.8329      | 5.6114      | 5.5623      | 5.8495      | 6.1544      | 4.1953      | 5.816       | 5.6655228               | 178.3013                           | 168.6                                             |
| 13       | C    | 168.98                                      | 168.7373    | 168.9734    | 168.9844    | 168.7321    | 168.2854    | 169.2291    | 168.7463    | 168.90263               | 15.06417                           | 12.7                                              |
| 14       | C    | 70.6988                                     | 70.7011     | 70.7616     | 70.5488     | 70.7708     | 68.6866     | 70.7416     | 70.553      | 70.68539                | 113.2814                           | 105.7                                             |
| 15       | C    | 71.9598                                     | 71.965      | 70.4512     | 69.989      | 70.4418     | 63.3071     | 71.6801     | 69.943      | 70.696694               | 113.2701                           | 110.7                                             |
| 16       | C    | 126.7779                                    | 126.8001    | 126.8118    | 126.8016    | 126.8332    | 127.8321    | 126.8028    | 126.8315    | 126.81002               | 57.15678                           | 54.0                                              |
| 1        | H    | 28.9229                                     | 28.9162     | 28.9171     | 26.2931     | 28.9097     | 28.9603     | 29.1244     | 28.9338     | 28.439902               | 3.428998                           | 2.61                                              |
| 3        | H    | 26.9561                                     | 26.952      | 27.1632     | 26.856      | 27.1618     | 27.5008     | 26.969      | 26.852      | 27.02693                | 4.84197                            | 4.28                                              |

|         |   |          |          |          |          |         |          |         |         |           |          |       |
|---------|---|----------|----------|----------|----------|---------|----------|---------|---------|-----------|----------|-------|
| 4a      | H | 29.9663  | 29.9094  | 30.1471  | 29.9801  | 30.1341 | 29.49573 | 29.9375 | 29.9431 | 30.044455 | 1.824445 | 1.64  |
| 4b      | H | 29.48105 | 29.48675 | 29.3968  | 28.9394  | 29.4043 | 29.49573 | 29.4321 | 29.5039 | 29.346061 | 2.522839 | 2.38  |
| 5       | H | 29.48105 | 29.48675 | 29.4741  | 26.6039  | 29.4772 | 29.1733  | 29.5075 | 29.5039 | 28.954834 | 2.914066 | 2.23  |
| 7a      | H | 30.3533  | 30.3655  | 30.3432  | 27.1796  | 30.3555 | 30.975   | 30.3209 | 30.3762 | 29.775356 | 2.093544 | 1.55  |
| 7b      | H | 29.8698  | 29.9094  | 29.87597 | 26.6814  | 29.8655 | 29.5882  | 29.799  | 29.8327 | 29.288273 | 2.580627 | 2.17  |
| 8a      | H | 29.8698  | 29.9094  | 29.87597 | 28.3984  | 29.9312 | 29.89515 | 29.7054 | 29.9431 | 29.62136  | 2.24754  | 1.97  |
| 8b      | H | 29.2577  | 29.2827  | 29.2703  | 28.161   | 29.2956 | 29.49573 | 29.3235 | 29.2943 | 29.072836 | 2.796064 | 2.42  |
| 9       | H | 26.68777 | 26.72285 | 26.6901  | 28.789   | 26.6982 | 26.7931  | 26.5135 | 26.7052 | 27.07771  | 4.79119  | 4.81  |
| 10      | H | 24.5368  | 24.5057  | 24.5564  | 30.5027  | 24.5249 | 24.6917  | 24.5797 | 24.5007 | 25.625245 | 6.243655 | 6.60  |
| 13      | H | 30.1589  | 29.9094  | 30.0437  | 29.50045 | 29.9312 | 30.0079  | 30.3209 | 29.9431 | 29.930557 | 1.938343 | 1.77  |
| 13      | H | 30.0352  | 29.7595  | 29.87597 | 29.86437 | 29.7588 | 29.89515 | 28.6606 | 29.7537 | 29.864679 | 2.004221 | 1.77  |
| 13      | H | 29.8698  | 30.0418  | 30.1471  | 29.86437 | 30.046  | 30.1019  | 30.2414 | 30.0411 | 30.01306  | 1.85584  | 1.77  |
| 14      | H | 27.1863  | 27.1925  | 27.299   | 24.5303  | 27.3044 | 27.0488  | 27.1237 | 27.1869 | 26.75539  | 5.11351  | 4.37  |
| 15a     | H | 26.68777 | 26.6371  | 26.6901  | 30.3593  | 26.6982 | 26.46315 | 26.7508 | 26.5973 | 27.34815  | 4.52075  | 4.80  |
| 15b     | H | 26.68777 | 26.72285 | 26.3376  | 29.2675  | 26.3381 | 26.46315 | 26.6602 | 26.2974 | 26.962689 | 4.906211 | 5.03  |
| 16      | H | 28.3938  | 28.3968  | 28.3954  | 25.4785  | 28.399  | 28.3303  | 28.4392 | 28.4017 | 27.863805 | 4.005095 | 3.20  |
| 16      | H | 28.1628  | 28.1657  | 28.1723  | 30.033   | 28.1759 | 28.176   | 28.2241 | 28.1648 | 28.50965  | 3.35925  | 3.20  |
| 16      | H | 28.7907  | 28.7926  | 28.8325  | 30.159   | 28.8333 | 28.8594  | 28.7814 | 28.7901 | 29.060435 | 2.808465 | 3.20  |
| 3-OH    | H | 29.8698  | 29.9094  | 31.2024  | 29.86437 | 31.2042 | 27.9855  | 29.8797 | 30.5055 | 30.548603 | 1.320297 | 4.90  |
| 12-COOH | H | 25.4851  | 25.3674  | 25.489   | 29.50045 | 25.3622 | 25.4467  | 25.5869 | 25.3639 | 26.18195  | 5.68695  | 12.40 |

<sup>a</sup> Calculated using the GIAO method at the B3LYP/6-311+G(d,p) level in DMSO (PCM). <sup>b</sup> Measured in DMSO-*d*<sub>6</sub> (400 and 100 MHz).



**Table S8** Calculated  $^1\text{H}$  and  $^{13}\text{C}$  NMR chemical shifts of compound **1b**.

| Position | Type | Shielding tensors (calculated) <sup>a</sup> |             |             |             |             |                      | Chemical shifts (ppm)<br>(calculated) | Chemical shifts (ppm)<br>(experimental) <sup>b</sup> |
|----------|------|---------------------------------------------|-------------|-------------|-------------|-------------|----------------------|---------------------------------------|------------------------------------------------------|
|          |      | <b>1b-1</b>                                 | <b>1b-2</b> | <b>1b-3</b> | <b>1b-4</b> | <b>1b-5</b> | <b>1b</b> (averaged) | <b>1b</b> (unscaled)                  | Brasilterpene A ( <b>1</b> )                         |
| 1        | C    | 126.8673                                    | 126.9803    | 127.1546    | 127.0295    | 126.4992    | 126.8703             | 57.09645                              | 51.1                                                 |
| 2        | C    | 14.5307                                     | 14.5615     | 14.2979     | 14.3107     | 17.6692     | 14.86201             | 169.1048                              | 153.8                                                |
| 3        | C    | 109.1947                                    | 109.1953    | 109.2252    | 109.2782    | 109.2818    | 109.2051             | 74.76175                              | 64.8                                                 |
| 4        | C    | 146.2069                                    | 146.2703    | 146.3825    | 146.4152    | 141.7258    | 145.7646             | 38.2022                               | 35.9                                                 |
| 5        | C    | 138.1753                                    | 138.1976    | 138.9825    | 138.9603    | 138.3587    | 138.2198             | 45.74704                              | 38.7                                                 |
| 6        | C    | 119.9326                                    | 119.8808    | 122.1739    | 122.2038    | 120.3351    | 120.0097             | 63.95715                              | 54.2                                                 |
| 7        | C    | 153.6784                                    | 153.6837    | 153.402     | 153.3337    | 153.8263    | 153.6886             | 30.27816                              | 29.1                                                 |
| 8        | C    | 138.029                                     | 138.2677    | 138.9138    | 138.9603    | 138.1575    | 138.1384             | 45.82835                              | 40.8                                                 |
| 9        | C    | 103.6849                                    | 103.9735    | 99.1035     | 98.6802     | 103.5881    | 103.6581             | 80.30872                              | 73.0                                                 |
| 10       | C    | 26.3264                                     | 25.7646     | 26.7619     | 26.6285     | 26.2996     | 26.15496             | 157.8118                              | 142.1                                                |
| 11       | C    | 48.9163                                     | 48.7574     | 52.2765     | 51.7789     | 48.945      | 48.94226             | 135.0245                              | 128.3                                                |
| 12       | C    | 5.8509                                      | 5.9364      | 4.4983      | 4.2794      | 5.8397      | 5.844187             | 178.1226                              | 168.6                                                |
| 13       | C    | 168.909                                     | 168.6527    | 169.2185    | 169.2191    | 168.9243    | 168.8366             | 15.13015                              | 12.7                                                 |
| 14       | C    | 70.5191                                     | 70.4922     | 70.6361     | 70.6643     | 70.4391     | 70.50515             | 113.4616                              | 105.7                                                |
| 15       | C    | 64.6031                                     | 64.5641     | 64.4498     | 64.4925     | 61.967      | 64.31309             | 119.6537                              | 110.7                                                |
| 16       | C    | 126.7121                                    | 126.7311    | 126.8201    | 126.8172    | 126.7146    | 126.7208179          | 57.24598                              | 54.0                                                 |
| 1        | H    | 28.9706                                     | 28.9621     | 29.0822     | 29.0979     | 28.9378     | 28.96717             | 2.901732                              | 2.61                                                 |
| 3        | H    | 27.3027                                     | 27.3054     | 27.32535    | 27.3292     | 27.2047     | 27.2939              | 4.575004                              | 4.28                                                 |
| 4a       | H    | 29.9672                                     | 29.9662     | 29.9021     | 29.9076     | 30.05857    | 29.97495             | 1.893952                              | 1.64                                                 |
| 4b       | H    | 29.4105                                     | 29.4134     | 29.4036     | 29.4065     | 29.2672     | 29.39636             | 2.472541                              | 2.38                                                 |

|         |   |          |          |          |          |          |          |          |       |
|---------|---|----------|----------|----------|----------|----------|----------|----------|-------|
| 5       | H | 29.5511  | 29.5513  | 29.5679  | 29.5731  | 29.5348  | 29.54989 | 2.319011 | 2.23  |
| 7a      | H | 30.0433  | 30.0495  | 29.7994  | 29.7921  | 30.05857 | 30.04121 | 1.827686 | 1.55  |
| 7b      | H | 29.779   | 29.77775 | 29.6869  | 29.6787  | 29.747   | 29.7731  | 2.095796 | 2.17  |
| 8a      | H | 29.88015 | 29.8918  | 29.6301  | 29.6787  | 29.87105 | 29.87752 | 1.991377 | 1.97  |
| 8b      | H | 29.2737  | 29.2922  | 29.2559  | 29.2725  | 29.2672  | 29.27859 | 2.590312 | 2.42  |
| 9       | H | 26.7284  | 26.7465  | 26.55035 | 26.5403  | 26.7176  | 26.72885 | 5.140051 | 4.81  |
| 10      | H | 24.5327  | 24.5157  | 24.5461  | 24.5367  | 24.5153  | 24.52575 | 7.34315  | 6.60  |
| 13      | H | 30.1701  | 29.9662  | 28.6329  | 28.5494  | 29.87105 | 30.03869 | 1.830207 | 1.77  |
| 13      | H | 30.0433  | 29.77775 | 30.2284  | 30.15805 | 30.1651  | 29.97574 | 1.893163 | 1.77  |
| 13      | H | 29.88015 | 30.0495  | 30.3226  | 30.15805 | 30.05857 | 29.96118 | 1.907722 | 1.77  |
| 14      | H | 27.4065  | 27.4065  | 27.32535 | 27.3292  | 27.3811  | 27.40203 | 4.466874 | 4.37  |
| 15a     | H | 26.5707  | 26.5637  | 26.6891  | 26.6678  | 26.41525 | 26.55485 | 5.314048 | 4.80  |
| 15b     | H | 26.4806  | 26.4839  | 26.55035 | 26.5403  | 26.41525 | 26.47636 | 5.392539 | 5.03  |
| 16      | H | 28.1887  | 28.1955  | 28.2514  | 28.25    | 28.1825  | 28.19163 | 3.677271 | 3.20  |
| 16      | H | 28.8494  | 28.8504  | 28.8373  | 28.8362  | 28.8483  | 28.84932 | 3.019583 | 3.20  |
| 16      | H | 28.3926  | 28.3971  | 28.4479  | 28.4433  | 28.4006  | 28.39609 | 3.472813 | 3.20  |
| 3-OH    | H | 30.9158  | 30.9251  | 31.0301  | 31.0394  | 30.5954  | 30.88806 | 0.980837 | 4.90  |
| 12-COOH | H | 25.5066  | 25.36    | 25.6084  | 25.4144  | 25.4969  | 25.46013 | 6.40877  | 12.40 |

<sup>a</sup> Calculated using the GIAO method at the B3LYP/6-311+G(d,p) level in DMSO (PCM). <sup>b</sup> Measured in DMSO-*d*<sub>6</sub> (400 and 100 MHz).

**Figure S45** Correlation plots of experimental  $^{13}\text{C}$  NMR chemical shifts of brasilterpene A (**1**) corresponding calculated  $^{13}\text{C}$  NMR chemical shifts of **1a** and **1b**.

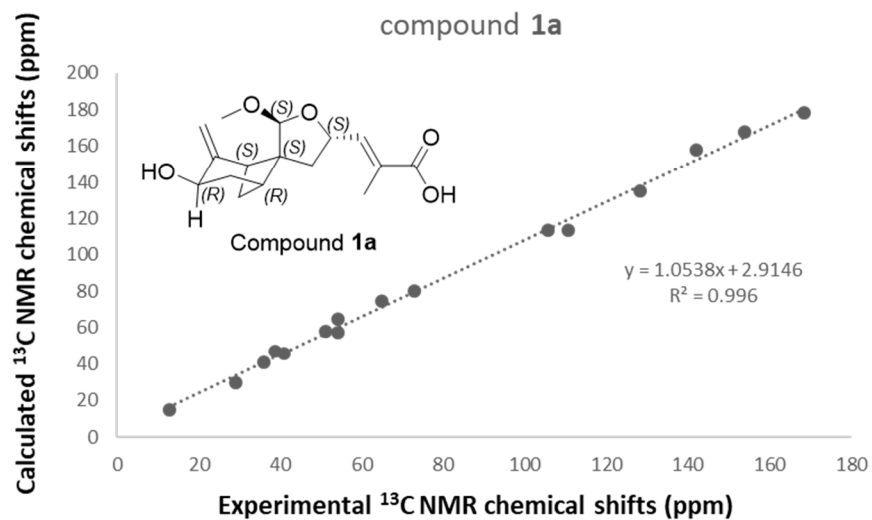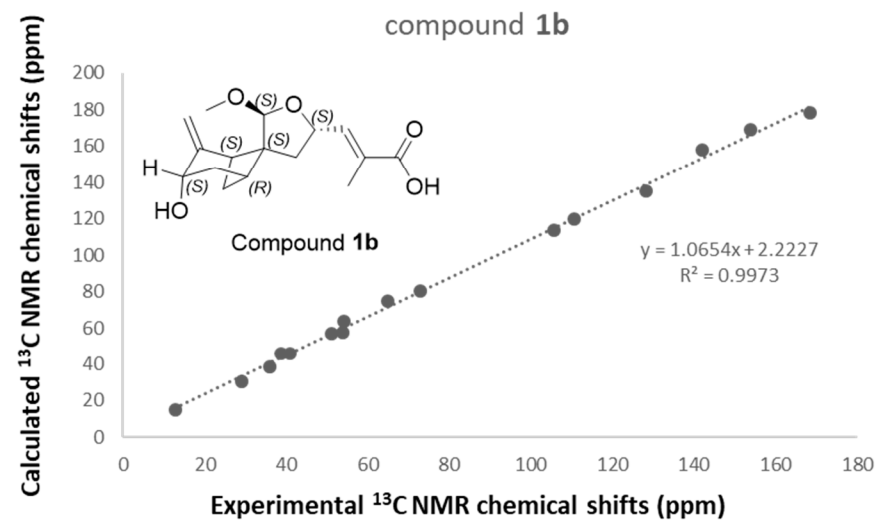

**Table S9** DP4+ analysis using the calculated shielding tensors for compound **1a** and **1b**.

| Functional       | Solvent? | Basis Set     |          | Type of Data      |          |          |
|------------------|----------|---------------|----------|-------------------|----------|----------|
| B3LYP            | PCM      | 6-311+G(d, p) |          | Shielding Tensors |          |          |
|                  |          | Isomer 1      | Isomer 2 | Isomer 3          | Isomer 4 | Isomer 5 |
| sDP4+ (H data)   |          | 0.00%         | 100.00%  | —                 | —        | —        |
| sDP4+ (C data)   |          | 0.89%         | 99.11%   | —                 | —        | —        |
| sDP4+ (all data) |          | 0.00%         | 100.00%  | —                 | —        | —        |
| uDP4+ (H data)   |          | 0.00%         | 100.00%  | —                 | —        | —        |
| uDP4+ (C data)   |          | 4.59%         | 95.41%   | —                 | —        | —        |
| uDP4+ (all data) |          | 0.00%         | 100.00%  | —                 | —        | —        |
| DP4+ (H data)    |          | 0.00%         | 100.00%  | —                 | —        | —        |
| DP4+ (C data)    |          | 0.04%         | 99.96%   | —                 | —        | —        |
| DP4+ (all data)  |          | 0.00%         | 100.00%  | —                 | —        | —        |

<sup>a</sup> sDP4+: scaled DP4+; <sup>b</sup> uDP4+: unscaled DP4+.

**Figure S46** DFT-optimized structures for low-energy conformers of **1** (1*S*,3*S*,5*R*,6*S*,9*S*,14*S*-**1**) at B3LYP/6-31+G(d) level in MeOH (PCM).

Conformer populations were calculated using the Gibbs free energy and Boltzmann population at 298 K estimated thereof.

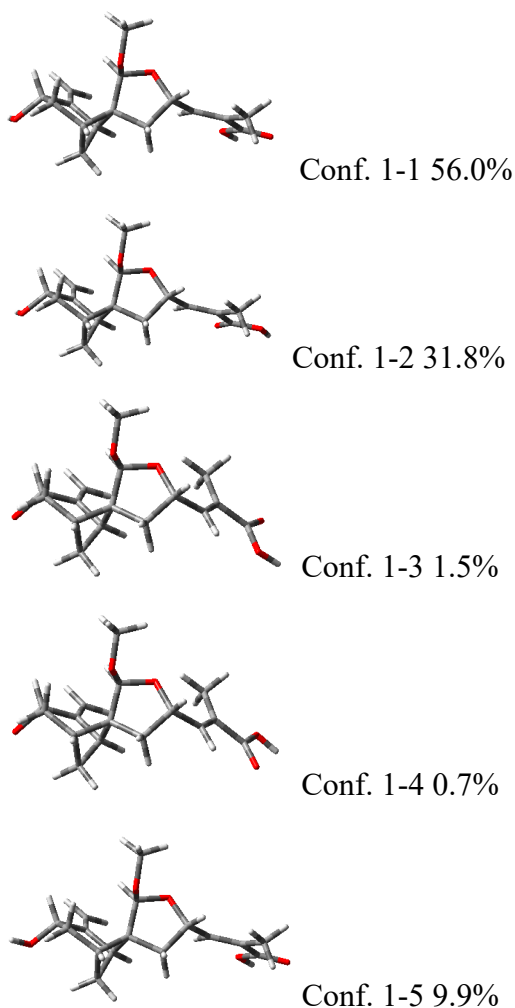

**Table S10** Harmonic frequencies (cm<sup>-1</sup>) of compound **1**.

| Conformations | Frequencies |         |         |
|---------------|-------------|---------|---------|
|               | 1           | 2       | 3       |
| 1-1           | 21.6203     | 26.3272 | 51.6263 |
| 1-2           | 21.9977     | 26.2790 | 51.6923 |
| 1-3           | 11.6008     | 24.9585 | 56.8813 |
| 1-4           | 12.8130     | 26.3628 | 57.0150 |
| 1-5           | 20.1432     | 25.6184 | 51.2415 |

**Table S11** Important thermodynamic parameters (a.u.) and Boltzmann distributions of the optimized compound **1** at B3LYP/6-31G+(d) level of theory with PCM solvent model for MeOH.

| Conformations | E+ZPE       | G           | %     |
|---------------|-------------|-------------|-------|
| 1-1           | -998.681656 | -998.732395 | 56.0% |
| 1-2           | -998.681260 | -998.731860 | 31.8% |
| 1-3           | -998.677686 | -998.728998 | 1.5%  |
| 1-4           | -998.677348 | -998.728302 | 0.7%  |
| 1-5           | -998.679895 | -998.730760 | 9.9%  |

E+ZPE, G: total energy with zero point energy (ZPE) and Gibbs free energy at B3LYP/6-31G+(d) level of theory with PCM solvent model for MeOH. %: Boltzmann distributions, using the relative Gibbs free energies as weighting factors

**Table S12** Cartesian coordinates of the low-energy re-optimized conformers of compound **1** (1*S*,3*S*,5*R*,6*S*,9*S*,14*S*-1) calculated at B3LYP/6-31+G(d) level of theory with PCM solvent model for MeOH.

| Conformer 1-1 |      | Standard Orientation<br>(Ångstroms) |          |          |
|---------------|------|-------------------------------------|----------|----------|
| I             | Atom | X                                   | Y        | Z        |
| 1             | C    | 2.54326                             | -0.28775 | -0.45061 |
| 2             | C    | 3.47355                             | 0.39018  | 0.5294   |
| 3             | C    | 2.74563                             | 1.42362  | 1.41713  |
| 4             | C    | 1.41948                             | 1.88673  | 0.77813  |
| 5             | C    | 0.37884                             | 0.72555  | 0.49251  |
| 6             | C    | 1.28748                             | 0.46869  | -0.78289 |
| 7             | C    | 2.72638                             | -1.51813 | -0.95159 |
| 8             | C    | 1.52448                             | 2.0202   | -0.77012 |
| 9             | C    | -1.06647                            | 1.11706  | 0.19013  |
| 10            | C    | -1.80834                            | -0.21403 | 0.30836  |
| 11            | O    | -0.98943                            | -1.10142 | 1.08646  |
| 12            | C    | 0.17552                             | -0.39095 | 1.51157  |

|    |   |          |          |          |
|----|---|----------|----------|----------|
| 13 | O | -0.05196 | 0.20649  | 2.78973  |
| 14 | C | -0.13403 | -0.76891 | 3.81987  |
| 15 | C | -2.0365  | -0.87835 | -1.01915 |
| 16 | C | -3.17689 | -0.8834  | -1.73951 |
| 17 | C | -3.25631 | -1.61807 | -3.0293  |
| 18 | O | -2.09009 | -2.15101 | -3.43042 |
| 19 | C | -4.44626 | -0.1762  | -1.3645  |
| 20 | O | -4.26212 | -1.74137 | -3.70648 |
| 21 | O | 4.48256  | 1.06743  | -0.21679 |
| 22 | H | 3.98435  | -0.34038 | 1.16644  |
| 23 | H | 3.38812  | 2.29541  | 1.58981  |
| 24 | H | 2.53364  | 0.9836   | 2.39812  |
| 25 | H | 1.00239  | 2.75855  | 1.29305  |
| 26 | H | 0.77729  | 0.10625  | -1.68086 |
| 27 | H | 2.00641  | -1.97572 | -1.62471 |
| 28 | H | 3.60408  | -2.10577 | -0.69836 |
| 29 | H | 0.72753  | 2.61271  | -1.23495 |
| 30 | H | 2.47026  | 2.39039  | -1.17627 |
| 31 | H | -1.22028 | 1.60888  | -0.77533 |
| 32 | H | -1.43185 | 1.80279  | 0.96518  |
| 33 | H | -2.7493  | -0.0824  | 0.85063  |
| 34 | H | 1.01919  | -1.08403 | 1.5765   |
| 35 | H | -0.97919 | -1.44308 | 3.65258  |
| 36 | H | 0.79776  | -1.339   | 3.88522  |
| 37 | H | -0.28943 | -0.25021 | 4.76975  |
| 38 | H | -1.17242 | -1.42388 | -1.39535 |
| 39 | H | -2.31975 | -2.58808 | -4.27618 |
| 40 | H | -4.805   | 0.43656  | -2.19899 |
| 41 | H | -5.22445 | -0.90301 | -1.10939 |
| 42 | H | -4.32464 | 0.49906  | -0.51375 |
| 43 | H | 4.76649  | 0.46501  | -0.92504 |

| Conformer 1-2 |      | Standard Orientation<br>(Ångstroms) |         |          |
|---------------|------|-------------------------------------|---------|----------|
| I             | Atom | X                                   | Y       | Z        |
| 1             | C    | 2.48443                             | 0.72767 | -0.48921 |
| 2             | C    | 3.24833                             | 1.3309  | 0.66733  |
| 3             | C    | 2.32509                             | 1.74018 | 1.83619  |
| 4             | C    | 0.86463                             | 1.91889 | 1.37037  |
| 5             | C    | 0.21513                             | 0.63144 | 0.71149  |
| 6             | C    | 1.02956                             | 1.0963  | -0.56888 |

|    |   |          |          |          |
|----|---|----------|----------|----------|
| 7  | C | 2.99175  | -0.1535  | -1.36357 |
| 8  | C | 0.77107  | 2.55425  | -0.04841 |
| 9  | C | -1.30223 | 0.60214  | 0.53781  |
| 10 | C | -1.575   | -0.86497 | 0.20797  |
| 11 | O | -0.4543  | -1.63176 | 0.67517  |
| 12 | C | 0.4706   | -0.74742 | 1.31207  |
| 13 | O | 0.19922  | -0.68134 | 2.7138   |
| 14 | C | 0.53209  | -1.89591 | 3.37208  |
| 15 | C | -1.69695 | -1.12255 | -1.26606 |
| 16 | C | -2.83247 | -1.29542 | -1.97253 |
| 17 | C | -2.66927 | -1.56202 | -3.42402 |
| 18 | O | -3.83085 | -1.88421 | -4.01609 |
| 19 | C | -4.22593 | -1.21655 | -1.42793 |
| 20 | O | -1.63362 | -1.51188 | -4.06337 |
| 21 | O | 3.91938  | 2.49659  | 0.1933   |
| 22 | H | 4.02037  | 0.64664  | 1.03635  |
| 23 | H | 2.67742  | 2.6747   | 2.28916  |
| 24 | H | 2.35818  | 0.97369  | 2.61865  |
| 25 | H | 0.24899  | 2.40044  | 2.13735  |
| 26 | H | 0.5729   | 0.88694  | -1.54128 |
| 27 | H | 2.38797  | -0.58584 | -2.15731 |
| 28 | H | 4.02921  | -0.47028 | -1.30878 |
| 29 | H | -0.21231 | 2.96744  | -0.30242 |
| 30 | H | 1.5099   | 3.3199   | -0.30221 |
| 31 | H | -1.69523 | 1.29078  | -0.21649 |
| 32 | H | -1.78627 | 0.85309  | 1.49026  |
| 33 | H | -2.45909 | -1.22076 | 0.74508  |
| 34 | H | 1.48935  | -1.11245 | 1.15297  |
| 35 | H | -0.07147 | -2.72477 | 2.99064  |
| 36 | H | 1.59721  | -2.11789 | 3.25474  |
| 37 | H | 0.31922  | -1.7762  | 4.43784  |
| 38 | H | -0.74227 | -1.19479 | -1.78806 |
| 39 | H | -3.57604 | -2.03821 | -4.9494  |
| 40 | H | -4.7007  | -2.20291 | -1.44904 |
| 41 | H | -4.26039 | -0.85228 | -0.39792 |
| 42 | H | -4.83255 | -0.524   | -2.0217  |
| 43 | H | 4.29493  | 2.27593  | -0.67596 |

| Conformer 1-3 |      | Standard Orientation<br>(Ångstroms) |   |   |
|---------------|------|-------------------------------------|---|---|
| I             | Atom | X                                   | Y | Z |

|    |   |          |          |          |
|----|---|----------|----------|----------|
| 1  | C | 1.62992  | -0.0037  | -1.43887 |
| 2  | C | 3.01196  | 0.32763  | -0.92357 |
| 3  | C | 2.97556  | 1.17759  | 0.36561  |
| 4  | C | 1.62111  | 1.8979   | 0.53313  |
| 5  | C | 0.36051  | 0.9387   | 0.58786  |
| 6  | C | 0.53143  | 0.91906  | -0.99031 |
| 7  | C | 1.32829  | -1.08169 | -2.17735 |
| 8  | C | 1.0445   | 2.39318  | -0.82636 |
| 9  | C | -0.96021 | 1.51363  | 1.09425  |
| 10 | C | -1.82215 | 0.25733  | 1.24683  |
| 11 | O | -0.92618 | -0.83189 | 1.48324  |
| 12 | C | 0.42208  | -0.36904 | 1.37022  |
| 13 | O | 0.94931  | -0.08781 | 2.6684   |
| 14 | C | 1.15458  | -1.27433 | 3.42271  |
| 15 | C | -2.68695 | 0.00826  | 0.03354  |
| 16 | C | -2.90051 | -1.12908 | -0.66367 |
| 17 | C | -3.7555  | -1.11183 | -1.88117 |
| 18 | O | -4.37374 | 0.06144  | -2.10019 |
| 19 | C | -2.35293 | -2.48117 | -0.30931 |
| 20 | O | -3.91627 | -2.04565 | -2.64752 |
| 21 | O | 3.69232  | 1.06998  | -1.93352 |
| 22 | H | 3.59948  | -0.57964 | -0.74427 |
| 23 | H | 3.78163  | 1.92108  | 0.35321  |
| 24 | H | 3.14792  | 0.53487  | 1.23617  |
| 25 | H | 1.6565   | 2.65242  | 1.32598  |
| 26 | H | -0.38566 | 0.83364  | -1.58139 |
| 27 | H | 0.31073  | -1.29255 | -2.49523 |
| 28 | H | 2.09435  | -1.78735 | -2.48555 |
| 29 | H | 0.2555   | 3.14987  | -0.74259 |
| 30 | H | 1.75973  | 2.76439  | -1.56612 |
| 31 | H | -1.41017 | 2.27518  | 0.45056  |
| 32 | H | -0.80688 | 1.96956  | 2.08083  |
| 33 | H | -2.48418 | 0.36271  | 2.1137   |
| 34 | H | 1.02967  | -1.13984 | 0.88741  |
| 35 | H | 0.20874  | -1.79667 | 3.59407  |
| 36 | H | 1.86496  | -1.93455 | 2.91579  |
| 37 | H | 1.57441  | -0.99416 | 4.39262  |
| 38 | H | -3.19375 | 0.91406  | -0.30058 |
| 39 | H | -4.88695 | -0.10296 | -2.91812 |
| 40 | H | -2.3496  | -2.64573 | 0.77236  |
| 41 | H | -2.9639  | -3.29052 | -0.72326 |



|    |   |          |          |          |
|----|---|----------|----------|----------|
| 42 | H | -1.33623 | -2.59608 | -0.69729 |
| 43 | H | 3.50657  | 0.63374  | -2.78228 |

| Conformer 1-4 |      | Standard Orientation<br>(Ångstroms) |          |          |
|---------------|------|-------------------------------------|----------|----------|
| I             | Atom | X                                   | Y        | Z        |
| 1             | C    | 1.7022                              | 0.08531  | -1.31632 |
| 2             | C    | 3.03942                             | 0.45281  | -0.71455 |
| 3             | C    | 2.89815                             | 1.29888  | 0.57008  |
| 4             | C    | 1.51705                             | 1.98283  | 0.65099  |
| 5             | C    | 0.2812                              | 0.99069  | 0.624    |
| 6             | C    | 0.55379                             | 0.97908  | -0.93989 |
| 7             | C    | 1.47524                             | -1.00167 | -2.06826 |
| 8             | C    | 1.0163                              | 2.46569  | -0.7425  |
| 9             | C    | -1.08497                            | 1.52786  | 1.04396  |
| 10            | C    | -1.92043                            | 0.24791  | 1.13686  |
| 11            | O    | -1.01193                            | -0.81686 | 1.43136  |
| 12            | C    | 0.32743                             | -0.31683 | 1.40771  |
| 13            | O    | 0.76077                             | -0.02466 | 2.73784  |
| 14            | C    | 0.94624                             | -1.20673 | 3.50405  |
| 15            | C    | -2.69021                            | -0.02371 | -0.13305 |
| 16            | C    | -2.83525                            | -1.16749 | -0.83565 |
| 17            | C    | -3.6197                             | -1.05979 | -2.09096 |
| 18            | O    | -3.39133                            | -2.08779 | -2.9246  |
| 19            | C    | -2.32314                            | -2.52148 | -0.45013 |
| 20            | O    | -4.37512                            | -0.15654 | -2.40297 |
| 21            | O    | 3.76279                             | 1.21467  | -1.67898 |
| 22            | H    | 3.63841                             | -0.43878 | -0.49837 |
| 23            | H    | 3.68337                             | 2.06344  | 0.60951  |
| 24            | H    | 3.03141                             | 0.65911  | 1.44964  |
| 25            | H    | 1.48149                             | 2.73621  | 1.44489  |
| 26            | H    | -0.32044                            | 0.87131  | -1.58934 |
| 27            | H    | 0.4849                              | -1.23935 | -2.44733 |
| 28            | H    | 2.27707                             | -1.68786 | -2.325   |
| 29            | H    | 0.20383                             | 3.20117  | -0.70923 |
| 30            | H    | 1.76753                             | 2.85719  | -1.43455 |
| 31            | H    | -1.51238                            | 2.2795   | 0.3738   |
| 32            | H    | -1.009                              | 1.98383  | 2.03946  |
| 33            | H    | -2.64292                            | 0.33241  | 1.95637  |
| 34            | H    | 0.98643                             | -1.06951 | 0.96549  |
| 35            | H    | 0.00472                             | -1.75297 | 3.61341  |

|    |   |          |          |          |
|----|---|----------|----------|----------|
| 36 | H | 1.70461  | -1.84811 | 3.04469  |
| 37 | H | 1.29468  | -0.91756 | 4.49927  |
| 38 | H | -3.1879  | 0.86905  | -0.51797 |
| 39 | H | -3.95575 | -1.88303 | -3.69862 |
| 40 | H | -2.28712 | -2.65564 | 0.63438  |
| 41 | H | -2.98257 | -3.31706 | -0.81417 |
| 42 | H | -1.32447 | -2.6865  | -0.86565 |
| 43 | H | 3.63559  | 0.78095  | -2.53967 |

| Conformer 1-5 |      | Standard Orientation<br>(Ångstroms) |          |          |
|---------------|------|-------------------------------------|----------|----------|
| I             | Atom | X                                   | Y        | Z        |
| 1             | C    | 1.97589                             | -0.42074 | -1.62305 |
| 2             | C    | 3.34627                             | -0.1341  | -1.05833 |
| 3             | C    | 3.28775                             | 0.70223  | 0.2406   |
| 4             | C    | 1.94385                             | 1.44734  | 0.37737  |
| 5             | C    | 0.66209                             | 0.51448  | 0.37583  |
| 6             | C    | 0.88343                             | 0.51739  | -1.19508 |
| 7             | C    | 1.67666                             | -1.47295 | -2.39871 |
| 8             | C    | 1.42214                             | 1.97714  | -0.9908  |
| 9             | C    | -0.65849                            | 1.11864  | 0.8491   |
| 10            | C    | -1.54627                            | -0.11131 | 1.03105  |
| 11            | O    | -0.68539                            | -1.25106 | 1.17881  |
| 12            | C    | 0.67301                             | -0.80827 | 1.13561  |
| 13            | O    | 1.15117                             | -0.55803 | 2.45957  |
| 14            | C    | 1.29012                             | -1.7604  | 3.20445  |
| 15            | C    | -2.43062                            | -0.37843 | -0.15313 |
| 16            | C    | -3.73969                            | -0.0764  | -0.27408 |
| 17            | C    | -4.49089                            | -0.43605 | -1.50551 |
| 18            | O    | -3.73078                            | -0.9707  | -2.47541 |
| 19            | C    | -4.56694                            | 0.63695  | 0.75488  |
| 20            | O    | -5.68641                            | -0.26772 | -1.67272 |
| 21            | O    | 4.06344                             | 0.59034  | -2.05469 |
| 22            | H    | 3.8975                              | -1.06331 | -0.87386 |
| 23            | H    | 4.10769                             | 1.42988  | 0.26424  |
| 24            | H    | 3.42041                             | 0.04486  | 1.10726  |
| 25            | H    | 1.9699                              | 2.18815  | 1.18344  |
| 26            | H    | -0.01719                            | 0.46093  | -1.81453 |
| 27            | H    | 0.66898                             | -1.65225 | -2.76114 |
| 28            | H    | 2.44591                             | -2.17365 | -2.70935 |
| 29            | H    | 0.64717                             | 2.74946  | -0.91913 |

|    |   |          |          |          |
|----|---|----------|----------|----------|
| 30 | H | 2.16902  | 2.34407  | -1.70086 |
| 31 | H | -1.09322 | 1.8649   | 0.17701  |
| 32 | H | -0.51253 | 1.604    | 1.82253  |
| 33 | H | -2.13368 | -0.02802 | 1.95016  |
| 34 | H | 1.28998  | -1.57901 | 0.66481  |
| 35 | H | 0.32266  | -2.255   | 3.33154  |
| 36 | H | 1.99958  | -2.43583 | 2.71663  |
| 37 | H | 1.67951  | -1.50582 | 4.19393  |
| 38 | H | -1.9301  | -0.89329 | -0.972   |
| 39 | H | -4.36914 | -1.14348 | -3.19754 |
| 40 | H | -3.97054 | 1.04943  | 1.5726   |
| 41 | H | -5.09896 | 1.48084  | 0.30172  |
| 42 | H | -5.3057  | -0.04564 | 1.18757  |
| 43 | H | 4.97243  | 0.70045  | -1.73083 |

**Figure S47** DFT-optimized structures for low-energy conformers of **2** (1*S*,3*S*,5*R*,6*S*,9*S*,14*R*-**2**) at B3LYP/6-31+G(d) level in MeOH (PCM).

Conformer populations were calculated using the Gibbs free energy and Boltzmann population at 298 K estimated thereof.

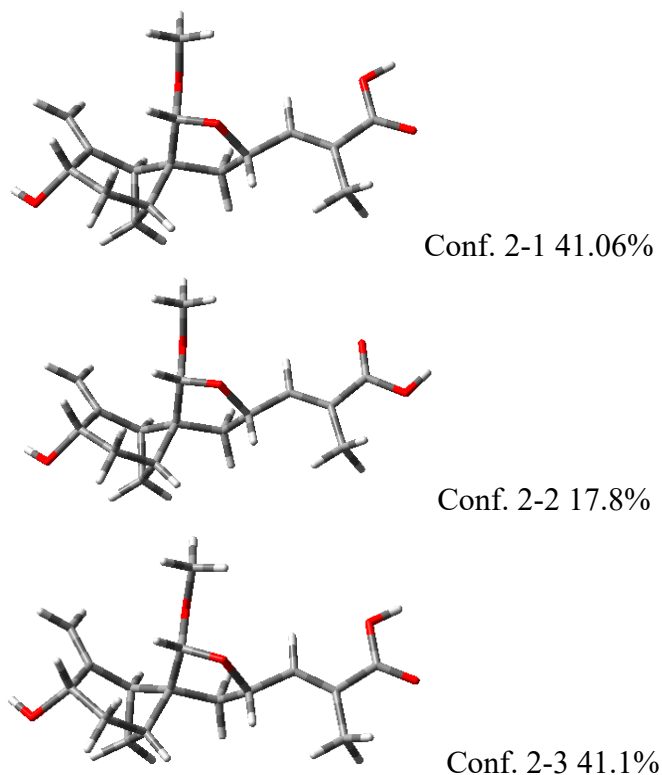

**Table S13** Harmonic frequencies (cm<sup>-1</sup>) of compound **2**.

| Conformations | Frequencies |   |   |
|---------------|-------------|---|---|
|               | 1           | 2 | 3 |

|     |         |         |         |
|-----|---------|---------|---------|
| 2-1 | 24.2970 | 30.1406 | 44.1924 |
| 2-2 | 26.0256 | 31.5825 | 45.6885 |
| 2-3 | 24.3081 | 30.1579 | 44.1860 |

**Table S14** Important thermodynamic parameters (a.u.) and Boltzmann distributions of the optimized compound **2** at B3LYP/6-31G+(d) level of theory with PCM solvent model for MeOH.

| Conformations | E+ZPE       | G           | %      |
|---------------|-------------|-------------|--------|
| 2-1           | -998.681458 | -998.732066 | 41.06% |
| 2-2           | -998.680987 | -998.731277 | 17.8%  |
| 2-3           | -998.681460 | -998.732068 | 41.1%  |

E+ZPE, G: total energy with zero point energy (ZPE) and Gibbs free energy at B3LYP/6-31G+(d) level of theory with PCM solvent model for MeOH. %: Boltzmann distributions, using the relative Gibbs free energies as weighting factors

**Table S15** Cartesian coordinates of the low-energy re-optimized conformers of compound **2** (1*S*,3*S*,5*R*,6*S*,9*S*,14*R*-**2**) calculated at B3LYP/6-31+G(d) level of theory with PCM solvent model for MeOH.

| Conformer 2-1 |      | Standard Orientation<br>(Ångstroms) |          |          |
|---------------|------|-------------------------------------|----------|----------|
| I             | Atom | X                                   | Y        | Z        |
| 1             | C    | -2.8643                             | -1.04166 | 1.18018  |
| 2             | C    | -3.53072                            | 0.29667  | 1.39856  |
| 3             | C    | -2.52396                            | 1.46831  | 1.38414  |
| 4             | C    | -1.0846                             | 0.97936  | 1.64231  |
| 5             | C    | -0.53777                            | -0.12361 | 0.63567  |
| 6             | C    | -1.39963                            | -1.1073  | 1.5227   |
| 7             | C    | -3.46246                            | -2.10815 | 0.62986  |
| 8             | C    | -1.03947                            | -0.15565 | 2.71447  |
| 9             | C    | 0.98136                             | -0.27652 | 0.63025  |
| 10            | C    | 1.37851                             | 0.69522  | -0.4795  |
| 11            | O    | 0.26231                             | 0.7916   | -1.38326 |
| 12            | C    | -0.8153                             | 0.0098   | -0.85847 |
| 13            | O    | -0.80037                            | -1.29597 | -1.43872 |
| 14            | C    | -1.16054                            | -1.26602 | -2.81256 |
| 15            | C    | 2.56942                             | 0.23525  | -1.26157 |
| 16            | C    | 3.81707                             | 0.74657  | -1.2332  |
| 17            | C    | 4.88627                             | 0.1869   | -2.1019  |
| 18            | O    | 4.50727                             | -0.881   | -2.8226  |
| 19            | C    | 4.27698                             | 1.87972  | -0.36348 |

|    |   |          |          |          |
|----|---|----------|----------|----------|
| 20 | O | 6.02377  | 0.61827  | -2.18005 |
| 21 | O | -4.16951 | 0.26957  | 2.67322  |
| 22 | H | -4.31297 | 0.48061  | 0.6538   |
| 23 | H | -2.55782 | 1.98034  | 0.41597  |
| 24 | H | -2.79537 | 2.21114  | 2.14409  |
| 25 | H | -0.4034  | 1.81709  | 1.82629  |
| 26 | H | -1.00825 | -2.12503 | 1.62249  |
| 27 | H | -2.92221 | -3.03375 | 0.44987  |
| 28 | H | -4.50596 | -2.08111 | 0.33124  |
| 29 | H | -0.05461 | -0.33746 | 3.16074  |
| 30 | H | -1.7522  | -0.08921 | 3.54164  |
| 31 | H | 1.2541   | -1.30962 | 0.37943  |
| 32 | H | 1.47587  | -0.02531 | 1.57334  |
| 33 | H | 1.51258  | 1.7005   | -0.06963 |
| 34 | H | -1.76526 | 0.50256  | -1.08382 |
| 35 | H | -1.15092 | -2.29192 | -3.19058 |
| 36 | H | -2.16926 | -0.86062 | -2.93757 |
| 37 | H | -0.4421  | -0.67847 | -3.39174 |
| 38 | H | 2.35077  | -0.59969 | -1.92736 |
| 39 | H | 5.31272  | -1.11602 | -3.32684 |
| 40 | H | 4.50331  | 2.75942  | -0.97498 |
| 41 | H | 3.53843  | 2.17346  | 0.3862   |
| 42 | H | 5.18216  | 1.59834  | 0.18615  |
| 43 | H | -4.60396 | -0.59658 | 2.75521  |

| Conformer 2-2 |      | Standard Orientation<br>(Ångstroms) |          |          |
|---------------|------|-------------------------------------|----------|----------|
| I             | Atom | X                                   | Y        | Z        |
| 1             | C    | -2.03801                            | -1.91195 | 1.76271  |
| 2             | C    | -3.15745                            | -0.91866 | 1.97015  |
| 3             | C    | -2.72323                            | 0.53327  | 1.67027  |
| 4             | C    | -1.18944                            | 0.6848   | 1.71544  |
| 5             | C    | -0.37182                            | -0.26309 | 0.73481  |
| 6             | C    | -0.64265                            | -1.35274 | 1.84677  |
| 7             | C    | -2.21502                            | -3.19792 | 1.42658  |
| 8             | C    | -0.5547                             | -0.16335 | 2.8633   |
| 9             | C    | 1.06529                             | 0.18352  | 0.47621  |
| 10            | C    | 0.8935                              | 1.04688  | -0.77244 |
| 11            | O    | -0.27259                            | 0.5682   | -1.46702 |
| 12            | C    | -0.86287                            | -0.48067 | -0.69302 |
| 13            | O    | -0.38858                            | -1.75068 | -1.14405 |

|    |   |          |          |          |
|----|---|----------|----------|----------|
| 14 | C | -0.88397 | -2.0705  | -2.43649 |
| 15 | C | 2.05767  | 0.96033  | -1.70915 |
| 16 | C | 2.97602  | 1.91227  | -1.9707  |
| 17 | C | 4.01786  | 1.56479  | -2.9707  |
| 18 | O | 4.80374  | 2.61208  | -3.27157 |
| 19 | C | 3.04569  | 3.26709  | -1.33466 |
| 20 | O | 4.19585  | 0.48121  | -3.49734 |
| 21 | O | -3.56643 | -0.99207 | 3.33436  |
| 22 | H | -4.03299 | -1.16921 | 1.36099  |
| 23 | H | -3.08183 | 0.83527  | 0.67988  |
| 24 | H | -3.17618 | 1.22188  | 2.3939   |
| 25 | H | -0.88976 | 1.73816  | 1.69824  |
| 26 | H | 0.13719  | -2.11142 | 1.96988  |
| 27 | H | -1.37242 | -3.85847 | 1.24014  |
| 28 | H | -3.20782 | -3.62281 | 1.31441  |
| 29 | H | 0.4663   | 0.12103  | 3.14413  |
| 30 | H | -1.1242  | -0.24983 | 3.79323  |
| 31 | H | 1.7006   | -0.68959 | 0.27965  |
| 32 | H | 1.52786  | 0.75031  | 1.28976  |
| 33 | H | 0.66432  | 2.07775  | -0.4874  |
| 34 | H | -1.95111 | -0.43757 | -0.79237 |
| 35 | H | -0.50691 | -3.05922 | -2.7117  |
| 36 | H | -1.97767 | -2.10611 | -2.43189 |
| 37 | H | -0.53197 | -1.34847 | -3.17915 |
| 38 | H | 2.12546  | 0.00484  | -2.23264 |
| 39 | H | 5.42459  | 2.2439   | -3.93398 |
| 40 | H | 4.04408  | 3.44671  | -0.92089 |
| 41 | H | 2.82802  | 4.04669  | -2.07205 |
| 42 | H | 2.34259  | 3.38805  | -0.50703 |
| 43 | H | -3.59699 | -1.93473 | 3.57143  |

| Conformer 2-3 |      | Standard Orientation<br>(Ångstroms) |          |         |
|---------------|------|-------------------------------------|----------|---------|
| I             | Atom | X                                   | Y        | Z       |
| 1             | C    | -2.50094                            | -1.01324 | 1.72152 |
| 2             | C    | -3.18668                            | 0.31302  | 1.95297 |
| 3             | C    | -2.21475                            | 1.50877  | 1.84354 |
| 4             | C    | -0.74883                            | 1.06266  | 2.01539 |
| 5             | C    | -0.24131                            | -0.05086 | 0.99982 |
| 6             | C    | -1.01532                            | -1.03361 | 1.96549 |
| 7             | C    | -3.10612                            | -2.10799 | 1.23845 |

|    |   |          |          |          |
|----|---|----------|----------|----------|
| 8  | C | -0.60179 | -0.04391 | 3.10792  |
| 9  | C | 1.2764   | -0.16597 | 0.89213  |
| 10 | C | 1.57358  | 0.80221  | -0.25634 |
| 11 | O | 0.40545  | 0.82326  | -1.08999 |
| 12 | C | -0.61907 | 0.03719  | -0.47438 |
| 13 | O | -0.61874 | -1.28323 | -1.01961 |
| 14 | C | -1.08671 | -1.30112 | -2.36031 |
| 15 | C | 2.80719  | 0.42455  | -1.02877 |
| 16 | C | 3.07952  | 0.62008  | -2.33674 |
| 17 | C | 4.34731  | 0.11574  | -2.92781 |
| 18 | O | 5.18666  | -0.43884 | -2.03618 |
| 19 | C | 2.20587  | 1.36199  | -3.30582 |
| 20 | O | 4.6528   | 0.17896  | -4.10615 |
| 21 | O | -3.73816 | 0.30195  | 3.26801  |
| 22 | H | -4.02145 | 0.45861  | 1.25843  |
| 23 | H | -2.32688 | 1.99552  | 0.86827  |
| 24 | H | -2.45453 | 2.26328  | 2.60263  |
| 25 | H | -0.0796  | 1.92155  | 2.13397  |
| 26 | H | -0.59105 | -2.03839 | 2.06207  |
| 27 | H | -2.55461 | -3.02397 | 1.04398  |
| 28 | H | -4.16766 | -2.11469 | 1.01069  |
| 29 | H | 0.41521  | -0.18973 | 3.49079  |
| 30 | H | -1.25914 | 0.02514  | 3.97955  |
| 31 | H | 1.55625  | -1.19493 | 0.63167  |
| 32 | H | 1.82692  | 0.10814  | 1.79706  |
| 33 | H | 1.70358  | 1.8138   | 0.1468   |
| 34 | H | -1.59101 | 0.50756  | -0.64794 |
| 35 | H | -1.0745  | -2.33603 | -2.71282 |
| 36 | H | -2.11459 | -0.92953 | -2.41394 |
| 37 | H | -0.43644 | -0.708   | -3.00942 |
| 38 | H | 3.55589  | -0.07759 | -0.41668 |
| 39 | H | 5.94911  | -0.71219 | -2.5865  |
| 40 | H | 1.5968   | 0.66055  | -3.88412 |
| 41 | H | 1.54703  | 2.08007  | -2.81002 |
| 42 | H | 2.80682  | 1.95186  | -4.00704 |
| 43 | H | -4.1425  | -0.57265 | 3.39943  |

**Figure S48** DFT-optimized structures for low-energy conformers of **3** (1*S*,5*S*,6*S*,9*S*,14*S*-**3**) at B3LYP/6-31+G(d) level in MeOH (PCM).

Conformer populations were calculated using the Gibbs free energy and Boltzmann population at 298 K estimated thereof.

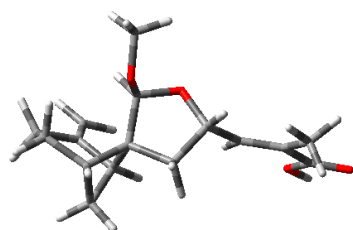

Conf. 3-1 67.8%

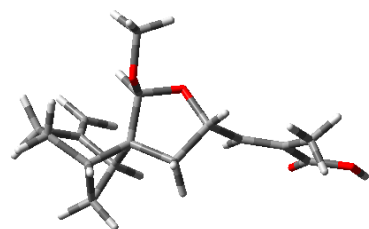

Conf. 3-2 31.0%

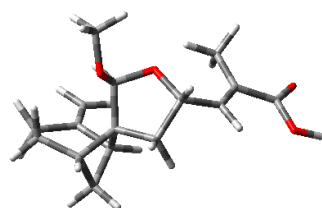

Conf. 3-3 0.6%

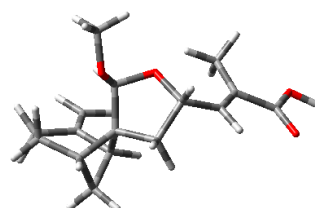

Conf. 3-4 0.3%

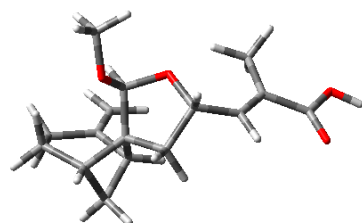

Conf. 3-5 0.3%

**Table S16** Harmonic frequencies ( $\text{cm}^{-1}$ ) of compound **3**.

| Conformations | Frequencies |         |         |
|---------------|-------------|---------|---------|
|               | 1           | 2       | 3       |
| 3-1           | 18.3149     | 25.0466 | 51.3692 |
| 3-2           | 20.0477     | 26.5908 | 51.5991 |
| 3-3           | 15.1774     | 26.5726 | 63.4862 |
| 3-4           | 16.3926     | 29.8734 | 61.5577 |
| 3-5           | 16.4050     | 29.8643 | 61.5653 |



**Table S17** Important thermodynamic parameters (a.u.) and Boltzmann distributions of the optimized compound **3** at B3LYP/6-31G+(d) level of theory with PCM solvent model for MeOH.

| Conformations | E+ZPE       | G           | %     |
|---------------|-------------|-------------|-------|
| 3-1           | -923.467275 | -923.517014 | 67.8% |
| 3-2           | -923.466815 | -923.516276 | 31.0% |
| 3-3           | -923.463038 | -923.512484 | 0.6%  |
| 3-4           | -923.462759 | -923.511969 | 0.3%  |
| 3-5           | -923.462760 | -923.511969 | 0.3%  |

E+ZPE, G: total energy with zero point energy (ZPE) and Gibbs free energy at B3LYP/6-31G+(d) level of theory with PCM solvent model for MeOH. %: Boltzmann distributions, using the relative Gibbs free energies as weighting factors.

**Table S18** Cartesian coordinates of the low-energy re-optimized conformers of compound **3** (1*S*,5*S*,6*S*,9*S*,14*S*-**3**) calculated at B3LYP/6-31+G(d) level of theory with PCM solvent model for MeOH.

| Conformer 3-1 |      | Standard Orientation<br>(Ångstroms) |          |          |
|---------------|------|-------------------------------------|----------|----------|
| I             | Atom | X                                   | Y        | Z        |
| 1             | C    | -1.34455                            | -0.13987 | -2.35161 |
| 2             | C    | -2.41803                            | -1.19532 | -2.46456 |
| 3             | C    | -2.35301                            | -2.2104  | -1.30476 |
| 4             | C    | -0.94359                            | -2.27269 | -0.68661 |
| 5             | C    | -0.43159                            | -0.90299 | -0.07601 |
| 6             | C    | -0.11644                            | -0.54851 | -1.58948 |
| 7             | C    | -1.45599                            | 1.11007  | -2.81904 |
| 8             | C    | 0.17235                             | -2.08347 | -1.75752 |
| 9             | C    | 0.78446                             | -0.93895 | 0.84702  |
| 10            | C    | 0.76404                             | 0.44985  | 1.485    |
| 11            | O    | -0.566                              | 0.97401  | 1.34659  |
| 12            | C    | -1.38413                            | -0.0184  | 0.72139  |
| 13            | O    | -2.01661                            | -0.82658 | 1.71749  |
| 14            | C    | -3.02227                            | -0.10571 | 2.41618  |
| 15            | C    | 1.69123                             | 1.41953  | 0.80977  |
| 16            | C    | 2.91616                             | 1.79834  | 1.22867  |
| 17            | C    | 3.70434                             | 2.79902  | 0.46246  |
| 18            | O    | 3.13555                             | 3.17686  | -0.69438 |
| 19            | C    | 3.61681                             | 1.28008  | 2.45033  |
| 20            | O    | 4.78186                             | 3.25485  | 0.80416  |
| 21            | H    | -2.26453                            | -1.73341 | -3.40885 |

|    |   |          |          |          |
|----|---|----------|----------|----------|
| 22 | H | -3.41928 | -0.75239 | -2.51269 |
| 23 | H | -2.63929 | -3.20003 | -1.68024 |
| 24 | H | -3.08742 | -1.94827 | -0.53492 |
| 25 | H | -0.82025 | -3.14133 | -0.03162 |
| 26 | H | 0.75292  | 0.09044  | -1.77293 |
| 27 | H | -0.66625 | 1.84431  | -2.68801 |
| 28 | H | -2.34599 | 1.43381  | -3.35057 |
| 29 | H | 1.17231  | -2.40326 | -1.44192 |
| 30 | H | -0.00874 | -2.52246 | -2.74389 |
| 31 | H | 1.7332   | -1.17011 | 0.35288  |
| 32 | H | 0.63231  | -1.69567 | 1.62718  |
| 33 | H | 0.97573  | 0.38297  | 2.55623  |
| 34 | H | -2.14546 | 0.47209  | 0.10803  |
| 35 | H | -3.4758  | -0.77695 | 3.15051  |
| 36 | H | -2.59234 | 0.74805  | 2.94824  |
| 37 | H | -3.80283 | 0.23158  | 1.72736  |
| 38 | H | 1.28434  | 1.86     | -0.09934 |
| 39 | H | 3.77202  | 3.82471  | -1.06046 |
| 40 | H | 3.11011  | 0.42435  | 2.90365  |
| 41 | H | 4.62903  | 0.94444  | 2.19871  |
| 42 | H | 3.69164  | 2.06742  | 3.20756  |

| Conformer 3-2 |      | Standard Orientation<br>(Ångstroms) |          |          |
|---------------|------|-------------------------------------|----------|----------|
| I             | Atom | X                                   | Y        | Z        |
| 1             | C    | -0.99891                            | 0.61341  | -2.49565 |
| 2             | C    | -1.92167                            | -0.39538 | -3.1356  |
| 3             | C    | -1.90428                            | -1.74665 | -2.39159 |
| 4             | C    | -0.59673                            | -1.93977 | -1.60066 |
| 5             | C    | -0.33186                            | -0.84251 | -0.4883  |
| 6             | C    | 0.1491                              | 0.03545  | -1.71864 |
| 7             | C    | -1.18188                            | 1.93955  | -2.52968 |
| 8             | C    | 0.62892                             | -1.32493 | -2.34048 |
| 9             | C    | 0.74019                             | -1.12848 | 0.56095  |
| 10            | C    | 0.47343                             | -0.05538 | 1.6161   |
| 11            | O    | -0.87604                            | 0.40283  | 1.44111  |
| 12            | C    | -1.48038                            | -0.34995 | 0.38596  |
| 13            | O    | -2.15206                            | -1.49126 | 0.92643  |
| 14            | C    | -3.32317                            | -1.12005 | 1.6405   |
| 15            | C    | 1.36574                             | 1.14352  | 1.47281  |
| 16            | C    | 2.45323                             | 1.4437   | 2.21152  |

|    |   |          |          |          |
|----|---|----------|----------|----------|
| 17 | C | 3.14673  | 2.71277  | 1.87557  |
| 18 | O | 4.10562  | 3.0195   | 2.76463  |
| 19 | C | 3.02741  | 0.60315  | 3.31078  |
| 20 | O | 2.92268  | 3.43761  | 0.92266  |
| 21 | H | -1.58022 | -0.55947 | -4.16578 |
| 22 | H | -2.94987 | -0.02157 | -3.19951 |
| 23 | H | -2.02175 | -2.55705 | -3.12082 |
| 24 | H | -2.76367 | -1.81365 | -1.71509 |
| 25 | H | -0.46897 | -2.97387 | -1.26436 |
| 26 | H | 0.95856  | 0.74669  | -1.52744 |
| 27 | H | -0.50361 | 2.62558  | -2.02978 |
| 28 | H | -2.01888 | 2.37817  | -3.06476 |
| 29 | H | 1.60473  | -1.67688 | -1.98591 |
| 30 | H | 0.63728  | -1.40147 | -3.43249 |
| 31 | H | 1.76852  | -1.11556 | 0.18666  |
| 32 | H | 0.56802  | -2.11824 | 1.00272  |
| 33 | H | 0.54366  | -0.48163 | 2.62109  |
| 34 | H | -2.19777 | 0.28146  | -0.14612 |
| 35 | H | -3.79685 | -2.03085 | 2.01674  |
| 36 | H | -3.07448 | -0.48248 | 2.49401  |
| 37 | H | -4.03091 | -0.60955 | 0.98017  |
| 38 | H | 1.0576   | 1.83897  | 0.69129  |
| 39 | H | 4.46364  | 3.86724  | 2.42865  |
| 40 | H | 2.56602  | -0.38558 | 3.37609  |
| 41 | H | 4.09758  | 0.43483  | 3.14763  |
| 42 | H | 2.89534  | 1.09778  | 4.27859  |

| Conformer 3-3 |      | Standard Orientation<br>(Ångstroms) |          |          |
|---------------|------|-------------------------------------|----------|----------|
| I             | Atom | X                                   | Y        | Z        |
| 1             | C    | -0.47418                            | 0.24115  | -2.2207  |
| 2             | C    | -1.52927                            | -0.65133 | -2.82838 |
| 3             | C    | -1.7429                             | -1.93849 | -2.00555 |
| 4             | C    | -0.50444                            | -2.279   | -1.15557 |
| 5             | C    | -0.10169                            | -1.16537 | -0.10316 |
| 6             | C    | 0.5456                              | -0.45507 | -1.36562 |
| 7             | C    | -0.43974                            | 1.57343  | -2.3516  |
| 8             | C    | 0.82237                             | -1.91133 | -1.88524 |
| 9             | C    | 0.877                               | -1.54208 | 1.00588  |
| 10            | C    | 0.79492                             | -0.32781 | 1.93515  |
| 11            | O    | -0.50016                            | 0.24905  | 1.7495   |

|    |   |          |          |          |
|----|---|----------|----------|----------|
| 12 | C | -1.1795  | -0.44199 | 0.69688  |
| 13 | O | -2.05681 | -1.42441 | 1.25407  |
| 14 | C | -3.17239 | -0.82613 | 1.89935  |
| 15 | C | 1.89237  | 0.67403  | 1.66323  |
| 16 | C | 1.82956  | 2.01605  | 1.52019  |
| 17 | C | 3.05496  | 2.7923   | 1.18895  |
| 18 | O | 4.18037  | 2.05725  | 1.16606  |
| 19 | C | 0.59264  | 2.84968  | 1.6901   |
| 20 | O | 3.09548  | 3.98627  | 0.94821  |
| 21 | H | -1.19426 | -0.93254 | -3.83512 |
| 22 | H | -2.48389 | -0.12661 | -2.94846 |
| 23 | H | -1.96423 | -2.76651 | -2.68947 |
| 24 | H | -2.62143 | -1.82923 | -1.35996 |
| 25 | H | -0.5495  | -3.29592 | -0.75232 |
| 26 | H | 1.45123  | 0.13309  | -1.18852 |
| 27 | H | 0.32717  | 2.17765  | -1.8754  |
| 28 | H | -1.18061 | 2.09894  | -2.94689 |
| 29 | H | 1.72103  | -2.38598 | -1.47443 |
| 30 | H | 0.84812  | -2.05988 | -2.96956 |
| 31 | H | 1.89348  | -1.76551 | 0.6687   |
| 32 | H | 0.50672  | -2.4291  | 1.53576  |
| 33 | H | 0.88895  | -0.65076 | 2.97813  |
| 34 | H | -1.75745 | 0.27492  | 0.10654  |
| 35 | H | -2.84996 | -0.20022 | 2.73667  |
| 36 | H | -3.75677 | -0.23464 | 1.18789  |
| 37 | H | -3.80921 | -1.62422 | 2.29049  |
| 38 | H | 2.86798  | 0.19626  | 1.57032  |
| 39 | H | 4.87194  | 2.71311  | 0.94036  |
| 40 | H | -0.02734 | 2.48916  | 2.51644  |
| 41 | H | 0.83055  | 3.88939  | 1.93901  |
| 42 | H | 0.0033   | 2.8524   | 0.7681   |

| Conformer 3-4 |      | Standard Orientation<br>(Ångstroms) |          |          |
|---------------|------|-------------------------------------|----------|----------|
| I             | Atom | X                                   | Y        | Z        |
| 1             | C    | -0.86732                            | -0.34118 | -2.06056 |
| 2             | C    | -1.91478                            | -1.41346 | -2.23928 |
| 3             | C    | -1.83728                            | -2.48722 | -1.13436 |
| 4             | C    | -0.4346                             | -2.54706 | -0.50066 |
| 5             | C    | 0.03618                             | -1.19889 | 0.18573  |
| 6             | C    | 0.36087                             | -0.75952 | -1.30391 |

|    |   |          |          |          |
|----|---|----------|----------|----------|
| 7  | C | -1.00059 | 0.92703  | -2.46953 |
| 8  | C | 0.68861  | -2.27644 | -1.5461  |
| 9  | C | 1.23689  | -1.24794 | 1.12685  |
| 10 | C | 1.20066  | 0.14216  | 1.76828  |
| 11 | O | -0.16113 | 0.57761  | 1.73383  |
| 12 | C | -0.9459  | -0.3784  | 1.01479  |
| 13 | O | -1.59631 | -1.25802 | 1.93598  |
| 14 | C | -2.62885 | -0.59662 | 2.65364  |
| 15 | C | 2.10861  | 1.11975  | 1.06186  |
| 16 | C | 1.87967  | 2.38887  | 0.66194  |
| 17 | C | 2.98988  | 3.04483  | -0.07304 |
| 18 | O | 2.57851  | 4.11769  | -0.7684  |
| 19 | C | 0.64528  | 3.1965   | 0.9233   |
| 20 | O | 4.15361  | 2.68588  | -0.10695 |
| 21 | H | -1.74048 | -1.89726 | -3.209   |
| 22 | H | -2.92548 | -0.99122 | -2.2743  |
| 23 | H | -2.09277 | -3.46231 | -1.56597 |
| 24 | H | -2.58836 | -2.28576 | -0.36246 |
| 25 | H | -0.29745 | -3.4449  | 0.11075  |
| 26 | H | 1.21671  | -0.09249 | -1.44532 |
| 27 | H | -0.22814 | 1.67044  | -2.29432 |
| 28 | H | -1.89065 | 1.25656  | -2.99725 |
| 29 | H | 1.69248  | -2.58803 | -1.23492 |
| 30 | H | 0.52956  | -2.66834 | -2.55584 |
| 31 | H | 2.19138  | -1.48198 | 0.6462   |
| 32 | H | 1.06582  | -2.00807 | 1.89991  |
| 33 | H | 1.52416  | 0.07895  | 2.81333  |
| 34 | H | -1.69578 | 0.1458   | 0.41536  |
| 35 | H | -3.09482 | -1.32102 | 3.32714  |
| 36 | H | -2.22374 | 0.22265  | 3.25491  |
| 37 | H | -3.39393 | -0.22012 | 1.96775  |
| 38 | H | 3.09276  | 0.69612  | 0.85052  |
| 39 | H | 3.39651  | 4.43466  | -1.20397 |
| 40 | H | 0.16609  | 2.9242   | 1.86757  |
| 41 | H | 0.87751  | 4.26289  | 1.01903  |
| 42 | H | -0.07341 | 3.07369  | 0.10745  |

| Conformer 3-5 |      | Standard Orientation<br>(Ångstroms) |         |          |
|---------------|------|-------------------------------------|---------|----------|
| I             | Atom | X                                   | Y       | Z        |
| 1             | C    | -0.83666                            | 0.19791 | -2.15083 |

|    |   |          |          |          |
|----|---|----------|----------|----------|
| 2  | C | -1.78428 | -0.86529 | -2.65268 |
| 3  | C | -1.63863 | -2.1903  | -1.87793 |
| 4  | C | -0.25705 | -2.30547 | -1.20949 |
| 5  | C | 0.06048  | -1.1636  | -0.1597  |
| 6  | C | 0.39428  | -0.30763 | -1.45243 |
| 7  | C | -1.05447 | 1.51463  | -2.25962 |
| 8  | C | 0.87142  | -1.66851 | -2.07618 |
| 9  | C | 1.23042  | -1.38717 | 0.79507  |
| 10 | C | 1.02429  | -0.28564 | 1.83659  |
| 11 | O | -0.34325 | 0.11893  | 1.77929  |
| 12 | C | -1.01794 | -0.68002 | 0.80284  |
| 13 | O | -1.60452 | -1.82312 | 1.43042  |
| 14 | C | -2.71236 | -1.46393 | 2.24439  |
| 15 | C | 1.97677  | 0.86752  | 1.64835  |
| 16 | C | 1.76767  | 2.17705  | 1.39494  |
| 17 | C | 2.99335  | 3.01628  | 1.32737  |
| 18 | O | 2.72318  | 4.32861  | 1.42071  |
| 19 | C | 0.45801  | 2.8653   | 1.16307  |
| 20 | O | 4.14087  | 2.62206  | 1.21523  |
| 21 | H | -1.55085 | -1.05285 | -3.70876 |
| 22 | H | -2.82639 | -0.52805 | -2.61495 |
| 23 | H | -1.78826 | -3.02711 | -2.57056 |
| 24 | H | -2.42796 | -2.27166 | -1.12228 |
| 25 | H | -0.05601 | -3.32222 | -0.85633 |
| 26 | H | 1.18605  | 0.44092  | -1.34803 |
| 27 | H | -0.35057 | 2.24669  | -1.87595 |
| 28 | H | -1.94544 | 1.89759  | -2.74855 |
| 29 | H | 1.88898  | -1.97142 | -1.80335 |
| 30 | H | 0.78309  | -1.78037 | -3.16166 |
| 31 | H | 2.21866  | -1.36095 | 0.32574  |
| 32 | H | 1.12777  | -2.36623 | 1.28046  |
| 33 | H | 1.20689  | -0.69288 | 2.83831  |
| 34 | H | -1.79844 | -0.08325 | 0.32176  |
| 35 | H | -3.12433 | -2.3769  | 2.68286  |
| 36 | H | -2.40116 | -0.80078 | 3.05692  |
| 37 | H | -3.49236 | -0.98614 | 1.64369  |
| 38 | H | 3.01227  | 0.5457   | 1.78598  |
| 39 | H | 3.60747  | 4.74748  | 1.37864  |
| 40 | H | -0.31761 | 2.19891  | 0.786    |
| 41 | H | 0.1021   | 3.32812  | 2.08877  |
| 42 | H | 0.55451  | 3.64777  | 0.40186  |

**Figure S49** DFT-optimized structures for low-energy conformers of **4** (1*S*,5*S*,6*S*,9*S*,14*R*-**4**) at B3LYP/6-31+G(d) level in MeOH (PCM).

Conformer populations were calculated using the Gibbs free energy and Boltzmann population at 298 K estimated thereof.

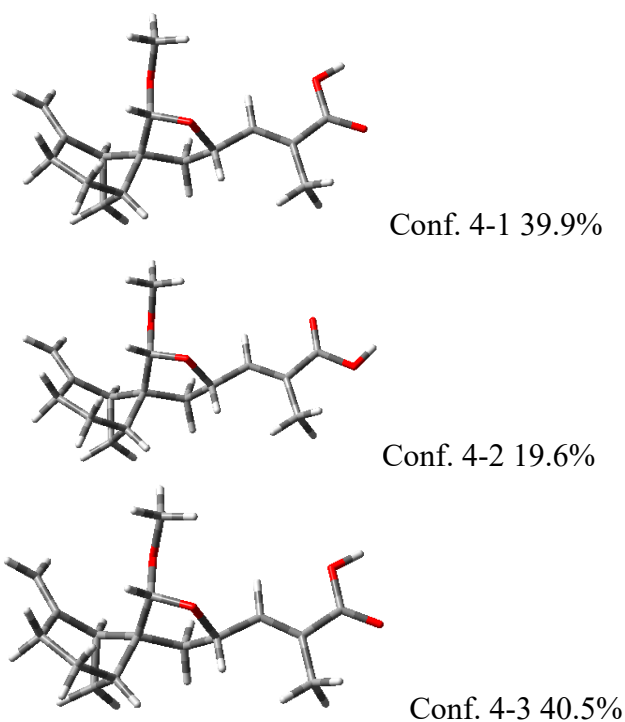

**Table S19** Harmonic frequencies (cm<sup>-1</sup>) of compound **4**.

| Conformations | Frequencies |         |         |
|---------------|-------------|---------|---------|
|               | 1           | 2       | 3       |
| 4-1           | 26.3742     | 31.1182 | 47.1196 |
| 4-2           | 27.7961     | 31.5383 | 48.0854 |
| 4-3           | 26.2287     | 31.0826 | 47.1166 |

**Table S20** Important thermodynamic parameters (a.u.) and Boltzmann distributions of the optimized compound **4** at B3LYP/6-31G+(d) level of theory with PCM solvent model for MeOH.

| Conformations | E+ZPE       | G           | %     |
|---------------|-------------|-------------|-------|
| 4-1           | -923.466817 | -923.515931 | 39.9% |
| 4-2           | -923.466347 | -923.515262 | 19.6% |
| 4-3           | -923.466820 | -923.515944 | 40.5% |

E+ZPE, G: total energy with zero point energy (ZPE) and Gibbs free energy at B3LYP/6-31G+(d) level of theory with PCM solvent model for MeOH. %: Boltzmann distributions, using the relative Gibbs free energies as weighting factors.

**Table S21** Cartesian coordinates of the low-energy re-optimized conformers of compound **4** (1*S*,5*S*,6*S*,9*S*,14*R*-**4**) calculated at B3LYP/6-31+G(d) level of theory with PCM solvent model for MeOH.

| Conformer 4-1 |      | Standard Orientation<br>(Ångstroms) |          |          |
|---------------|------|-------------------------------------|----------|----------|
| I             | Atom | X                                   | Y        | Z        |
| 1             | C    | 2.53717                             | 0.35688  | -2.22331 |
| 2             | C    | 1.89106                             | -0.22625 | -3.45632 |
| 3             | C    | 0.60704                             | -1.01158 | -3.11919 |
| 4             | C    | 0.60209                             | -1.4794  | -1.6533  |
| 5             | C    | 0.7168                              | -0.3279  | -0.56274 |
| 6             | C    | 2.25092                             | -0.36595 | -0.93497 |
| 7             | C    | 3.26283                             | 1.48219  | -2.20989 |
| 8             | C    | 2.03089                             | -1.89927 | -1.1798  |
| 9             | C    | 0.28385                             | -0.74555 | 0.84009  |
| 10            | C    | -1.19509                            | -0.36134 | 0.82553  |
| 11            | O    | -1.35101                            | 0.71008  | -0.12339 |
| 12            | C    | -0.08088                            | 0.96048  | -0.73539 |
| 13            | O    | 0.59489                             | 2.00871  | -0.03683 |
| 14            | C    | -0.01255                            | 3.27131  | -0.26949 |
| 15            | C    | -1.68764                            | 0.1211   | 2.15465  |
| 16            | C    | -2.51295                            | -0.52082 | 3.00649  |
| 17            | C    | -2.93125                            | 0.11683  | 4.28298  |
| 18            | O    | -2.3608                             | 1.31012  | 4.51517  |
| 19            | C    | -3.08347                            | -1.89357 | 2.80185  |
| 20            | O    | -3.71232                            | -0.36604 | 5.08484  |
| 21            | H    | 2.60943                             | -0.91382 | -3.92106 |
| 22            | H    | 1.6669                              | 0.54584  | -4.2011  |
| 23            | H    | 0.53455                             | -1.87864 | -3.78675 |
| 24            | H    | -0.27864                            | -0.39822 | -3.31866 |
| 25            | H    | -0.18457                            | -2.21828 | -1.46731 |
| 26            | H    | 2.9463                              | -0.13014 | -0.12295 |
| 27            | H    | 3.67431                             | 1.88391  | -1.28823 |
| 28            | H    | 3.45891                             | 2.03777  | -3.12163 |
| 29            | H    | 2.06124                             | -2.51522 | -0.27349 |
| 30            | H    | 2.67425                             | -2.38604 | -1.91986 |
| 31            | H    | 0.41625                             | -1.80735 | 1.0686   |
| 32            | H    | 0.84269                             | -0.17413 | 1.59224  |
| 33            | H    | -1.79479                            | -1.18873 | 0.43523  |
| 34            | H    | -0.22999                            | 1.24623  | -1.78049 |
| 35            | H    | 0.55359                             | 4.02913  | 0.27884  |



|    |   |          |          |          |
|----|---|----------|----------|----------|
| 36 | H | 0.01567  | 3.52175  | -1.33438 |
| 37 | H | -1.04431 | 3.28106  | 0.09419  |
| 38 | H | -1.32363 | 1.1157   | 2.41268  |
| 39 | H | -2.73873 | 1.58308  | 5.37585  |
| 40 | H | -2.90067 | -2.51998 | 3.68208  |
| 41 | H | -4.16455 | -1.83444 | 2.63816  |
| 42 | H | -2.64381 | -2.41951 | 1.95105  |

| Conformer 4-2 |      | Standard Orientation<br>(Ångstroms) |          |          |
|---------------|------|-------------------------------------|----------|----------|
| I             | Atom | X                                   | Y        | Z        |
| 1             | C    | 1.86241                             | 0.4078   | -2.84984 |
| 2             | C    | 1.10237                             | -0.50427 | -3.78158 |
| 3             | C    | 0.12986                             | -1.4278  | -3.0197  |
| 4             | C    | 0.55431                             | -1.60299 | -1.55107 |
| 5             | C    | 0.65345                             | -0.26425 | -0.69889 |
| 6             | C    | 2.03611                             | -0.09729 | -1.44308 |
| 7             | C    | 2.30685                             | 1.62692  | -3.18042 |
| 8             | C    | 2.10908                             | -1.66343 | -1.40597 |
| 9             | C    | 0.64635                             | -0.47908 | 0.81244  |
| 10            | C    | -0.84592                            | -0.37371 | 1.12481  |
| 11            | O    | -1.44177                            | 0.44792  | 0.10408  |
| 12            | C    | -0.42554                            | 0.80437  | -0.83961 |
| 13            | O    | 0.1416                              | 2.06852  | -0.48883 |
| 14            | C    | -0.76855                            | 3.13488  | -0.71647 |
| 15            | C    | -1.12357                            | 0.26185  | 2.45132  |
| 16            | C    | -1.59744                            | -0.33172 | 3.56535  |
| 17            | C    | -1.80474                            | 0.54889  | 4.74333  |
| 18            | O    | -2.40822                            | -0.09252 | 5.75802  |
| 19            | C    | -1.91261                            | -1.78818 | 3.72093  |
| 20            | O    | -1.49138                            | 1.72113  | 4.84683  |
| 21            | H    | 1.83225                             | -1.12797 | -4.31363 |
| 22            | H    | 0.55442                             | 0.05993  | -4.54479 |
| 23            | H    | 0.10222                             | -2.40428 | -3.5181  |
| 24            | H    | -0.8903                             | -1.0312  | -3.06902 |
| 25            | H    | 0.01059                             | -2.42168 | -1.06788 |
| 26            | H    | 2.8257                              | 0.40841  | -0.87798 |
| 27            | H    | 2.814                               | 2.26307  | -2.46045 |
| 28            | H    | 2.16772                             | 2.02619  | -4.18021 |
| 29            | H    | 2.47486                             | -2.08108 | -0.46072 |
| 30            | H    | 2.66223                             | -2.15861 | -2.21055 |

|    |   |          |          |          |
|----|---|----------|----------|----------|
| 31 | H | 1.05516  | -1.43776 | 1.14559  |
| 32 | H | 1.22038  | 0.31416  | 1.30821  |
| 33 | H | -1.31959 | -1.35475 | 1.0266   |
| 34 | H | -0.86108 | 0.85807  | -1.84137 |
| 35 | H | -0.2729  | 4.07095  | -0.44526 |
| 36 | H | -1.04691 | 3.18447  | -1.77362 |
| 37 | H | -1.66202 | 3.02494  | -0.09481 |
| 38 | H | -0.92021 | 1.33421  | 2.47104  |
| 39 | H | -2.48468 | 0.60012  | 6.44666  |
| 40 | H | -1.59114 | -2.38932 | 2.86697  |
| 41 | H | -1.40253 | -2.20035 | 4.59854  |
| 42 | H | -2.99082 | -1.93458 | 3.84314  |

| Conformer 4-3 |      | Standard Orientation<br>(Ångstroms) |          |          |
|---------------|------|-------------------------------------|----------|----------|
| I             | Atom | X                                   | Y        | Z        |
| 1             | C    | 2.30179                             | -0.62475 | -2.31303 |
| 2             | C    | 1.42311                             | -1.0398  | -3.46773 |
| 3             | C    | 0.03288                             | -1.512   | -2.99521 |
| 4             | C    | 0.06374                             | -1.97197 | -1.52717 |
| 5             | C    | 0.54303                             | -0.88125 | -0.47401 |
| 6             | C    | 1.98463                             | -1.2676  | -0.98993 |
| 7             | C    | 3.26315                             | 0.30419  | -2.38997 |
| 8             | C    | 1.39827                             | -2.70907 | -1.18419 |
| 9             | C    | 0.16357                             | -1.19075 | 0.97066  |
| 10            | C    | -1.19388                            | -0.49015 | 1.08372  |
| 11            | O    | -1.17446                            | 0.6021   | 0.15271  |
| 12            | C    | 0.04778                             | 0.55525  | -0.59097 |
| 13            | O    | 1.01512                             | 1.41792  | 0.0109   |
| 14            | C    | 0.70717                             | 2.78681  | -0.20664 |
| 15            | C    | -1.49437                            | -0.03187 | 2.48421  |
| 16            | C    | -2.20167                            | 1.04393  | 2.89112  |
| 17            | C    | -2.33466                            | 1.35621  | 4.33884  |
| 18            | O    | -1.78333                            | 0.43844  | 5.15188  |
| 19            | C    | -2.93626                            | 1.99379  | 1.99066  |
| 20            | O    | -2.88926                            | 2.33736  | 4.80321  |
| 21            | H    | 1.91717                             | -1.8716  | -3.98621 |
| 22            | H    | 1.30962                             | -0.23398 | -4.20179 |
| 23            | H    | -0.2998                             | -2.33692 | -3.6367  |
| 24            | H    | -0.70475                            | -0.71162 | -3.12062 |
| 25            | H    | -0.84857                            | -2.51249 | -1.25364 |

|    |   |          |          |          |
|----|---|----------|----------|----------|
| 26 | H | 2.79081  | -1.20001 | -0.25234 |
| 27 | H | 3.8429   | 0.5976   | -1.51935 |
| 28 | H | 3.49155  | 0.80341  | -3.32645 |
| 29 | H | 1.37513  | -3.31906 | -0.27366 |
| 30 | H | 1.8389   | -3.32725 | -1.97302 |
| 31 | H | 0.08439  | -2.25545 | 1.21014  |
| 32 | H | 0.90053  | -0.75034 | 1.65461  |
| 33 | H | -1.98426 | -1.17806 | 0.75994  |
| 34 | H | -0.14107 | 0.86964  | -1.62134 |
| 35 | H | 1.47992  | 3.39202  | 0.27501  |
| 36 | H | 0.70631  | 3.01506  | -1.27688 |
| 37 | H | -0.25934 | 3.04534  | 0.23503  |
| 38 | H | -1.05865 | -0.67878 | 3.24514  |
| 39 | H | -1.95636 | 0.79909  | 6.04566  |
| 40 | H | -2.32666 | 2.88092  | 1.79379  |
| 41 | H | -3.21589 | 1.53524  | 1.03828  |
| 42 | H | -3.87825 | 2.32047  | 2.44533  |

**Figure S50** DFT-optimized structures for low-energy conformers of **5** (1*S*,5*S*,6*S*,9*S*,14*R*-**5**) at B3LYP/tzvp level in MeOH (PCM).

Conformer populations were calculated using the Gibbs free energy and Boltzmann population at 298 K estimated thereof.

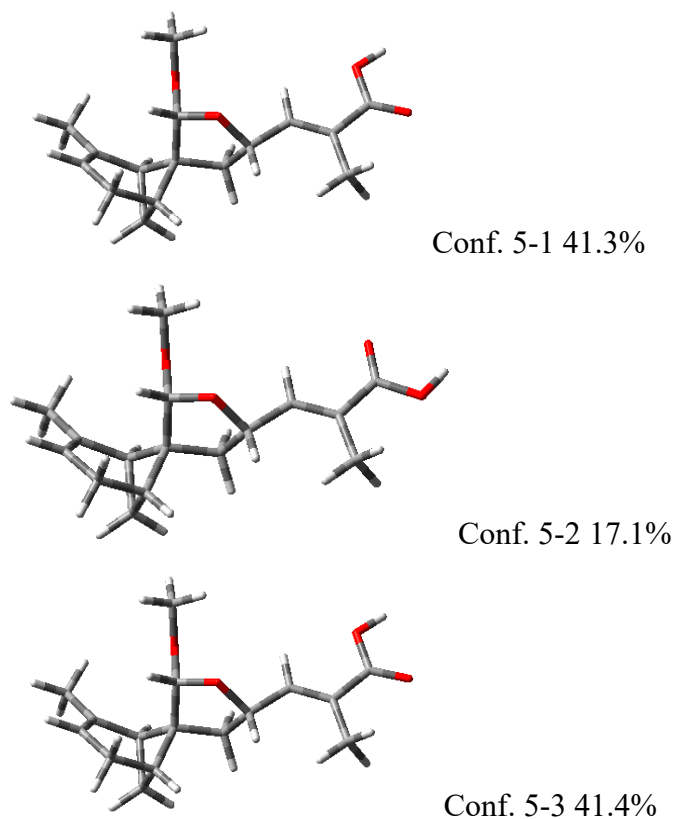

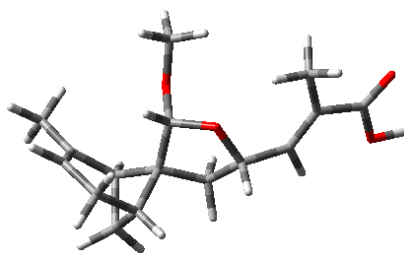

Conf. 5-4 0.1%

**Table S22** Harmonic frequencies ( $\text{cm}^{-1}$ ) of compound **5**.

| Conformations | Frequencies |         |         |
|---------------|-------------|---------|---------|
|               | 1           | 2       | 3       |
| 5-1           | 20.8988     | 30.2225 | 44.1280 |
| 5-2           | 22.9947     | 30.4718 | 45.9334 |
| 5-3           | 20.8697     | 30.2121 | 44.1263 |
| 5-4           | 25.1160     | 31.5041 | 47.8987 |

**Table S23** Important thermodynamic parameters (a.u.) and Boltzmann distributions of the optimized compound **5** at B3LYP/tzvp level of theory with PCM solvent model for MeOH.

| Conformations | E+ZPE       | G           | %     |
|---------------|-------------|-------------|-------|
| 5-1           | -923.764225 | -923.813918 | 41.3% |
| 5-2           | -923.763721 | -923.813088 | 17.1% |
| 5-3           | -923.764226 | -923.813921 | 41.4% |
| 5-4           | -923.759765 | -923.808588 | 0.1%  |

E+ZPE, G: total energy with zero point energy (ZPE) and Gibbs free energy at B3LYP/tzvp level of theory with PCM solvent model for MeOH. %: Boltzmann distributions, using the relative Gibbs free energies as weighting factors.

**Table S24** Cartesian coordinates of the low-energy re-optimized conformers of compound **5** (1*S*,5*S*,6*S*,9*S*,14*R*-**5**) calculated at B3LYP/tzvp level of theory with PCM solvent model for MeOH.

| Conformer 5-1 |      | Standard Orientation<br>(Ångstroms) |          |          |
|---------------|------|-------------------------------------|----------|----------|
| I             | Atom | X                                   | Y        | Z        |
| 1             | C    | 1.24502                             | -2.14306 | -2.29182 |
| 2             | C    | 0.05138                             | -2.71538 | -2.54501 |
| 3             | C    | -0.97912                            | -2.87955 | -1.44985 |
| 4             | C    | -0.42364                            | -2.28365 | -0.1413  |
| 5             | C    | 0.26714                             | -0.8573  | -0.28129 |
| 6             | C    | 1.47201                             | -1.7019  | -0.86831 |
| 7             | C    | 2.32346                             | -1.91537 | -3.29718 |

|    |   |          |          |          |
|----|---|----------|----------|----------|
| 8  | C | 1.02184  | -2.81695 | 0.1396   |
| 9  | C | 0.47028  | -0.10711 | 1.03129  |
| 10 | C | -0.81299 | 0.71572  | 1.11038  |
| 11 | O | -1.2607  | 0.94048  | -0.23792 |
| 12 | C | -0.40318 | 0.21799  | -1.13013 |
| 13 | O | 0.61191  | 1.0859   | -1.63932 |
| 14 | C | 0.08141  | 2.03386  | -2.55435 |
| 15 | C | -0.6136  | 2.04938  | 1.76078  |
| 16 | C | -1.03469 | 2.43818  | 2.98159  |
| 17 | C | -0.77732 | 3.81928  | 3.46876  |
| 18 | O | -0.04456 | 4.57082  | 2.63121  |
| 19 | C | -1.77053 | 1.57773  | 3.96645  |
| 20 | O | -1.16725 | 4.2718   | 4.53148  |
| 21 | H | -0.2029  | -3.06698 | -3.5409  |
| 22 | H | -1.20334 | -3.94318 | -1.31437 |
| 23 | H | -1.90804 | -2.37417 | -1.73343 |
| 24 | H | -1.1252  | -2.39212 | 0.69216  |
| 25 | H | 2.4712   | -1.29201 | -0.6929  |
| 26 | H | 2.03395  | -2.27187 | -4.29095 |
| 27 | H | 2.55002  | -0.8473  | -3.37514 |
| 28 | H | 3.23572  | -2.44312 | -3.00186 |
| 29 | H | 1.38257  | -2.68286 | 1.16565  |
| 30 | H | 1.22616  | -3.85518 | -0.14301 |
| 31 | H | 0.58982  | -0.74213 | 1.91413  |
| 32 | H | 1.3577   | 0.53507  | 0.96291  |
| 33 | H | -1.60474 | 0.1329   | 1.59016  |
| 34 | H | -1.00169 | -0.17999 | -1.95427 |
| 35 | H | 0.90396  | 2.65654  | -2.91651 |
| 36 | H | -0.37322 | 1.52847  | -3.41191 |
| 37 | H | -0.65173 | 2.68146  | -2.06446 |
| 38 | H | -0.076   | 2.75865  | 1.1313   |
| 39 | H | 0.02749  | 5.42988  | 3.09482  |
| 40 | H | -1.27989 | 1.61012  | 4.94566  |
| 41 | H | -2.80021 | 1.93126  | 4.08388  |
| 42 | H | -1.8085  | 0.52568  | 3.67397  |

| Conformer 5-2 |      | Standard Orientation<br>(Ångstroms) |          |          |
|---------------|------|-------------------------------------|----------|----------|
| I             | Atom | X                                   | Y        | Z        |
| 1             | C    | -1.31836                            | -2.36064 | -2.08033 |
| 2             | C    | -2.5616                             | -2.23619 | -1.57508 |

|    |   |          |          |          |
|----|---|----------|----------|----------|
| 3  | C | -2.77703 | -1.91803 | -0.11202 |
| 4  | C | -1.40716 | -1.75907 | 0.57657  |
| 5  | C | -0.34731 | -0.87206 | -0.21146 |
| 6  | C | -0.18973 | -2.1752  | -1.09832 |
| 7  | C | -0.99155 | -2.65255 | -3.50639 |
| 8  | C | -0.46977 | -2.96445 | 0.22855  |
| 9  | C | 0.84439  | -0.40225 | 0.61712  |
| 10 | C | 0.34822  | 0.95114  | 1.11986  |
| 11 | O | -0.60067 | 1.44372  | 0.15799  |
| 12 | C | -0.79527 | 0.44033  | -0.84625 |
| 13 | O | 0.04609  | 0.70463  | -1.9708  |
| 14 | C | -0.38435 | 1.85001  | -2.69204 |
| 15 | C | 1.44226  | 1.9641   | 1.25104  |
| 16 | C | 1.96773  | 2.46532  | 2.38708  |
| 17 | C | 3.03518  | 3.48526  | 2.22493  |
| 18 | O | 3.39694  | 4.03366  | 3.39692  |
| 19 | C | 1.58497  | 2.07395  | 3.78176  |
| 20 | O | 3.56474  | 3.83353  | 1.18507  |
| 21 | H | -3.43834 | -2.35432 | -2.2055  |
| 22 | H | -3.34414 | -2.72808 | 0.35932  |
| 23 | H | -3.36133 | -0.99742 | -0.01298 |
| 24 | H | -1.50494 | -1.54464 | 1.64571  |
| 25 | H | 0.8      | -2.33692 | -1.53586 |
| 26 | H | -1.89443 | -2.75726 | -4.1166  |
| 27 | H | -0.38985 | -1.84277 | -3.9311  |
| 28 | H | -0.42272 | -3.58451 | -3.58269 |
| 29 | H | 0.40064  | -3.08875 | 0.88264  |
| 30 | H | -0.94632 | -3.94589 | 0.1327   |
| 31 | H | 1.11793  | -1.05857 | 1.4486   |
| 32 | H | 1.72852  | -0.29508 | -0.02428 |
| 33 | H | -0.21369 | 0.82275  | 2.04958  |
| 34 | H | -1.84395 | 0.4458   | -1.15612 |
| 35 | H | 0.28568  | 1.98845  | -3.5449  |
| 36 | H | -1.4011  | 1.70706  | -3.07058 |
| 37 | H | -0.33601 | 2.74623  | -2.06649 |
| 38 | H | 1.81907  | 2.32447  | 0.29195  |
| 39 | H | 4.08687  | 4.6794   | 3.13837  |
| 40 | H | 0.91068  | 1.21477  | 3.81534  |
| 41 | H | 2.47239  | 1.79312  | 4.35958  |
| 42 | H | 1.08733  | 2.90692  | 4.28912  |

| Conformer 5-3 |      | Standard Orientation<br>(Ångstroms) |          |          |
|---------------|------|-------------------------------------|----------|----------|
| I             | Atom | X                                   | Y        | Z        |
| 1             | C    | 0.85446                             | -2.63931 | -1.8013  |
| 2             | C    | -0.42389                            | -2.98431 | -2.05271 |
| 3             | C    | -1.47755                            | -2.90251 | -0.9705  |
| 4             | C    | -0.83175                            | -2.36707 | 0.32263  |
| 5             | C    | 0.11984                             | -1.10536 | 0.1375   |
| 6             | C    | 1.14731                             | -2.18837 | -0.39288 |
| 7             | C    | 1.96653                             | -2.66428 | -2.79545 |
| 8             | C    | 0.48257                             | -3.15277 | 0.65103  |
| 9             | C    | 0.44804                             | -0.34896 | 1.41962  |
| 10            | C    | -0.66852                            | 0.69658  | 1.44858  |
| 11            | O    | -1.01967                            | 0.96053  | 0.08395  |
| 12            | C    | -0.32265                            | 0.04052  | -0.76475 |
| 13            | O    | 0.84458                             | 0.66404  | -1.30366 |
| 14            | C    | 0.51651                             | 1.62923  | -2.292   |
| 15            | C    | -0.26925                            | 1.94549  | 2.1852   |
| 16            | C    | -0.61351                            | 3.22776  | 1.93904  |
| 17            | C    | -0.05307                            | 4.33047  | 2.76473  |
| 18            | O    | 0.71454                             | 3.91568  | 3.78756  |
| 19            | C    | -1.5788                             | 3.68331  | 0.88391  |
| 20            | O    | -0.24428                            | 5.52025  | 2.58114  |
| 21            | H    | -0.73054                            | -3.32363 | -3.03805 |
| 22            | H    | -1.90155                            | -3.89739 | -0.79617 |
| 23            | H    | -2.29042                            | -2.24273 | -1.29088 |
| 24            | H    | -1.54942                            | -2.30449 | 1.147    |
| 25            | H    | 2.20453                             | -1.9688  | -0.21618 |
| 26            | H    | 1.62421                             | -3.00143 | -3.77915 |
| 27            | H    | 2.39359                             | -1.6632  | -2.91219 |
| 28            | H    | 2.75827                             | -3.34285 | -2.46283 |
| 29            | H    | 0.85182                             | -3.0455  | 1.67719  |
| 30            | H    | 0.48796                             | -4.22213 | 0.41447  |
| 31            | H    | 0.44869                             | -0.9577  | 2.32869  |
| 32            | H    | 1.43535                             | 0.12293  | 1.33333  |
| 33            | H    | -1.55369                            | 0.26815  | 1.93417  |
| 34            | H    | -0.98878                            | -0.26961 | -1.57471 |
| 35            | H    | 1.44632                             | 2.06967  | -2.662   |
| 36            | H    | -0.00093                            | 1.1572   | -3.13282 |
| 37            | H    | -0.10005                            | 2.42777  | -1.86982 |
| 38            | H    | 0.39752                             | 1.74469  | 3.02349  |

|    |   |          |         |          |
|----|---|----------|---------|----------|
| 39 | H | 0.99525  | 4.75342 | 4.20981  |
| 40 | H | -1.04139 | 3.97864 | -0.02233 |
| 41 | H | -2.31256 | 2.91366 | 0.62953  |
| 42 | H | -2.16564 | 4.54242 | 1.22781  |

| Conformer 5-4 |      | Standard Orientation<br>(Ångstroms) |          |          |
|---------------|------|-------------------------------------|----------|----------|
| I             | Atom | X                                   | Y        | Z        |
| 1             | C    | -2.33994                            | -2.19477 | -0.19407 |
| 2             | C    | -3.26322                            | -1.48761 | 0.48682  |
| 3             | C    | -2.88164                            | -0.69368 | 1.71579  |
| 4             | C    | -1.36541                            | -0.83404 | 1.95546  |
| 5             | C    | -0.44662                            | -0.66354 | 0.66457  |
| 6             | C    | -0.93571                            | -2.13982 | 0.35299  |
| 7             | C    | -2.6028                             | -2.99862 | -1.42315 |
| 8             | C    | -0.93648                            | -2.33938 | 1.90868  |
| 9             | C    | 1.0312                              | -0.42576 | 0.95838  |
| 10            | C    | 1.06458                             | 1.09544  | 1.00369  |
| 11            | O    | 0.13964                             | 1.55434  | 0.01324  |
| 12            | C    | -0.74364                            | 0.46879  | -0.32029 |
| 13            | O    | -0.44941                            | 0.00786  | -1.63935 |
| 14            | C    | -1.0095                             | 0.85969  | -2.62827 |
| 15            | C    | 2.4458                              | 1.66318  | 0.84713  |
| 16            | C    | 3.03857                             | 2.21575  | -0.23247 |
| 17            | C    | 4.41271                             | 2.77497  | -0.13249 |
| 18            | O    | 5.00079                             | 2.57306  | 1.05998  |
| 19            | C    | 2.42467                             | 2.29839  | -1.59784 |
| 20            | O    | 5.00629                             | 3.36722  | -1.01691 |
| 21            | H    | -4.30184                            | -1.46805 | 0.16912  |
| 22            | H    | -3.43655                            | -1.07035 | 2.58195  |
| 23            | H    | -3.14973                            | 0.35885  | 1.57851  |
| 24            | H    | -1.03843                            | -0.29066 | 2.84787  |
| 25            | H    | -0.22899                            | -2.76907 | -0.19637 |
| 26            | H    | -3.6546                             | -2.94975 | -1.72289 |
| 27            | H    | -1.99761                            | -2.62774 | -2.25636 |
| 28            | H    | -2.34945                            | -4.0494  | -1.25103 |
| 29            | H    | 0.04324                             | -2.56476 | 2.34469  |
| 30            | H    | -1.64736                            | -3.06581 | 2.31677  |
| 31            | H    | 1.3955                              | -0.86715 | 1.89045  |
| 32            | H    | 1.6437                              | -0.8125  | 0.1341   |



|    |   |          |         |          |
|----|---|----------|---------|----------|
| 33 | H | 0.66661  | 1.44533 | 1.96513  |
| 34 | H | -1.77536 | 0.82785 | -0.26333 |
| 35 | H | -0.64024 | 1.88371 | -2.51933 |
| 36 | H | -0.71173 | 0.48527 | -3.61134 |
| 37 | H | -2.10216 | 0.84519 | -2.5692  |
| 38 | H | 3.00694  | 1.62341 | 1.78064  |
| 39 | H | 5.87756  | 2.99495 | 0.9488   |
| 40 | H | 1.87474  | 1.3856  | -1.84016 |
| 41 | H | 1.7519   | 3.15881 | -1.6651  |
| 42 | H | 3.18055  | 2.40097 | -2.38356 |
